# Supplementary material for: Role of mitochondrial metabolic disorder and immune infiltration in diabetic cardiomyopathy: new insights from bioinformatics analysis
Source: PubMed Central journal article supplement (PMC9893675; doi:10.1186/s12967-023-03928-8), 2023-02-01

**a GSE4745, selected samples**

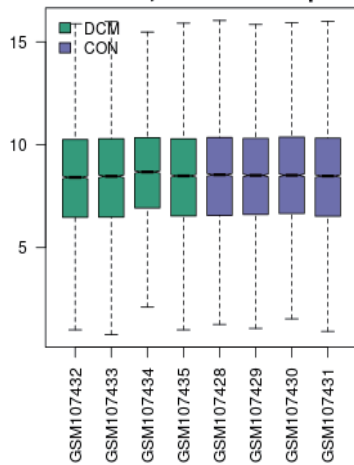

**b GSE5606**

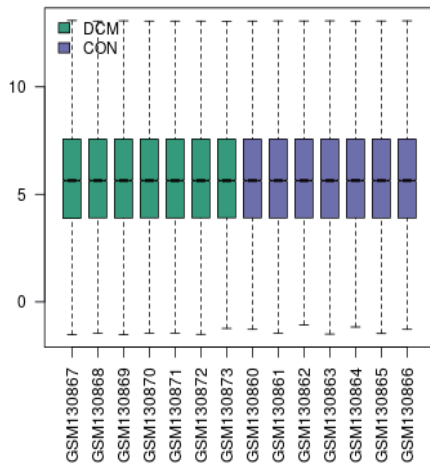

**c GSE6880**

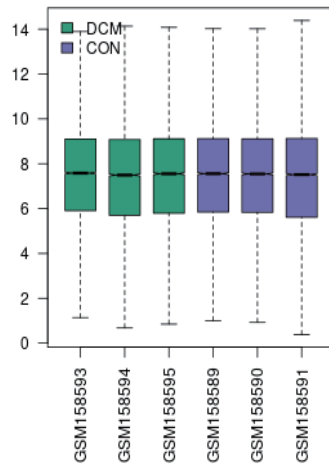

Supplement: 12967_2023_3928_MOESM1_ESM.pdf [file 12967_2023_3928_MOESM1_ESM.pdf]
