# Supplementary material for: Role of mitochondrial metabolic disorder and immune infiltration in diabetic cardiomyopathy: new insights from bioinformatics analysis
Source: J Transl Med. 2023 Feb 1;21:66. doi: 10.1186/s12967-023-03928-8 (PMC9893675; doi:10.1186/s12967-023-03928-8)
Supplement: Supplementary file 2 — Additional file 2: Table S1. Data cohort characteristics. [file 12967_2023_3928_MOESM2_ESM.xlsx]

## Sheet: Sheet1
Additional file 2: Table S1. Data cohort characteristics.
GEO	Platform	Tissue	Samples(number)			Experiment type	Author/ Reference
		Rattus norvegicus	Total	CON	DCM
GSE4745	GPL85	left ventricle	8(42day)	4(42day)	4(42day)	array	Gerber LK
GSE5606	GPL1355	left ventricle	14	7	7	array	Glyn-Jones S
GSE6880	GPL341	left ventricle	6	3	3	array	van Lunteren E
