# Supplementary material for: Role of mitochondrial metabolic disorder and immune infiltration in diabetic cardiomyopathy: new insights from bioinformatics analysis
Source: J Transl Med. 2023 Feb 1;21:66. doi: 10.1186/s12967-023-03928-8 (PMC9893675; doi:10.1186/s12967-023-03928-8)
Supplement: Supplementary file 4 — Additional file 4: Table S3. GO enrichment analyses of DEGs from GSE4745, GSE5606 and GSE6880. [file 12967_2023_3928_MOESM4_ESM.xlsx]

## Sheet: Sheet1
Additional file 4: Table S3. GO enrichment analyses of DEGs from GSE4745,GSE5606 and GSE6880.
GSE4745-GO terms	Ontology	ID	Description	GeneRatio	BgRatio	pvalue	p.adjust	qvalue	geneID	Count	zscore
	BP	GO:0001666	response to hypoxia	33/282	424/17962	3.29e-14	1.17e-10	7.70e-11	Acot2/Acsl6/Adora1/Adrb2/Aldoc/Aqp1/Bdnf/Cd24/Cst3/Cyp1a1/Dnm1l/Higd1a/Hk2/Igf1/Igfbp3/Itpr1/Kcnd2/Kdr/Lta/Myc/Nat2/Nppa/Nr4a2/Pam/Penk/Prkcd/Slc11a2/Slc2a1/Slc2a4/Tfrc/Tgfb2/Tgfbr1/Ucp3	33	0.870388
	BP	GO:0006631	fatty acid metabolic process	31/282	379/17962	5.47e-14	1.17e-10	7.70e-11	Acadsb/Acot1/Acot2/Acot7/Acsl6/Alox15/Cbr1/Cd36/Cd74/Cpt1a/Crem/Cyp2e1/Cyp4f1/Dbi/Decr1/Ephx2/Gpam/Gstp1/Hpgd/Hsd17b4/Insig1/Ivd/Mecr/Nr4a3/Pam/Pdk4/Pnpla3/Scd/Slc27a1/Snca/Ucp3	31	1.97566
	BP	GO:0032868	response to insulin	25/282	326/17962	6.86e-11	1.96e-08	1.29e-08	Acsl6/Ahsg/Apobec1/Apoe/Bdh1/Ccl5/Cd36/Cyp27b1/Gclc/Gpam/Gstp1/Hmgcs2/Igf1/Igfbp3/Insig1/Myc/Nppa/Pdk4/Prkcd/Ptpre/Slc27a1/Slc2a1/Slc2a4/Sp1/Ucp3	25	3
	BP	GO:0050727	regulation of inflammatory response	22/282	358/17962	5.67e-08	4.51e-06	2.96e-06	Adcyap1/Adora1/Adrb2/Ahsg/Apoe/C2cd4b/Calcrl/Ccl5/Cd24/Cd74/Igf1/Jak2/Lta/Mas1/Nppa/Nr1d1/Nr1d2/RT1-Db1/S100a8/S100a9/Snca/Wfdc1	22	0.852803
	BP	GO:0070230	positive regulation of lymphocyte apoptotic process	5/282	24/17962	3.06e-05	6.23e-04	4.09e-04	Ccl5/Cd24/Myc/P2rx7/Tgfb2	5	-0.447214
	BP	GO:0000302	response to reactive oxygen species	15/282	295/17962	7.00e-05	0.001	7.64e-04	Aqp1/Casp6/Cd36/Cst3/Cyp11a1/Cyp2e1/Ddit3/Dusp1/Gstp1/Hsph1/Met/Nr4a3/Prkcd/Txnip/Ucp3	15	0.258199
	BP	GO:0007204	positive regulation of cytosolic calcium ion concentration	16/282	353/17962	1.55e-04	0.002	0.001	Adcyap1/Adrb2/Agtr1a/Cacna1c/Cckar/Cd24/Cd36/Dbi/Ddit3/Itpr1/Jak2/Kdr/P2rx7/Ptgfr/Snca/Tgfb2	16	1.5
	BP	GO:0002495	antigen processing and presentation of peptide antigen via MHC class II	4/282	21/17962	2.88e-04	0.003	0.002	Cd74/RT1-Ba/RT1-Da/RT1-Db1	4	-2
	BP	GO:0008637	apoptotic mitochondrial changes	8/282	113/17962	4.12e-04	0.004	0.003	Camk2a/Cd24/Dnm1l/Gclc/Higd1a/Hk2/Hspa1a/Igf1	8	-1.41421
	CC	GO:0045121	membrane raft	27/280	396/18446	7.88e-11	1.64e-08	1.12e-08	Add1/Adrb2/Aqp1/Cacna1c/Cd24/Cd36/Chrna3/Dcc/Eno2/Gnai1/Hspa1a/Itpr1/Jak2/Kcnd2/Kcnd3/Kcne1/Kcnq1/Kdr/Mog/P2rx7/Pdzk1/Scarb1/Scn5a/Slc27a1/Slc2a1/Slc2a4/Tgfbr1	27	-0.96225
	CC	GO:0062023	collagen-containing extracellular matrix	16/280	217/18446	2.21e-07	8.72e-06	5.94e-06	Ahsg/Col1a2/Col3a1/Col5a2/Cst3/Entpd2/Gpc3/Igf1/Lad1/Lamb2/Lum/Pcsk6/Serpine2/Sparc/Tgfb2/Tnc	16	-1
	CC	GO:0042613	MHC class II protein complex	4/280	14/18446	4.61e-05	4.04e-04	2.75e-04	Cd74/RT1-Ba/RT1-Da/RT1-Db1	4	-2
	CC	GO:0005741	mitochondrial outer membrane	10/280	151/18446	1.06e-04	7.58e-04	5.16e-04	Acsl6/Cpt1a/Dnm1l/Gpam/Hk2/Maoa/Mgst1/Pi4kb/Slc11a2/Snca	10	0
	CC	GO:0042611	MHC protein complex	4/280	27/18446	6.92e-04	0.004	0.002	Cd74/RT1-Ba/RT1-Da/RT1-Db1	4	-2
	CC	GO:0005759	mitochondrial matrix	11/280	309/18446	0.008	0.029	0.020	Acadsb/Acot2/Bdh1/Gstk1/Hmgcs2/Ivd/Pc/Pdha2/Pdk4/Pdp2/Snca	11	-0.301511
	CC	GO:0005743	mitochondrial inner membrane	11/280	362/18446	0.023	0.075	0.051	Bdh1/Bdnf/Cyp11a1/Cyp1a1/Cyp27a1/Cyp2e1/Higd1a/Ndufa4l2/Slc27a1/Snca/Ucp3	11	0.301511
	MF	GO:0022839	ion gated channel activity	21/279	326/16882	1.20e-07	1.59e-05	1.19e-05	Aqp1/Cacna1c/Chrna3/Cnga1/Gabra4/Gabrb3/Gabrg2/Htr3a/Itpr1/Kcna4/Kcnc3/Kcnd2/Kcnd3/Kcne1/Kcnf1/Kcnn3/Kcnq1/P2rx7/Scn1a/Scn5a/Scn9a	21	-1.09109
	MF	GO:1901567	fatty acid derivative binding	7/279	37/16882	2.10e-06	1.54e-04	1.16e-04	Acot7/Cyp4f1/Dbi/Pnpla3/S100a8/S100a9/Snca	7	1.88982
	MF	GO:0016209	antioxidant activity	7/279	84/16882	4.78e-04	0.008	0.006	Apoe/Gstk1/Gstp1/Gstt2/Mgst1/S100a8/S100a9	7	1.88982
	MF	GO:0035325	Toll-like receptor binding	3/279	13/16882	0.001	0.015	0.011	Cd36/S100a8/S100a9	3	1.73205
GSE5606-GO terms	Ontology	ID	Description	GeneRatio	BgRatio	pvalue	p.adjust	qvalue	geneID	Count	zscore
	BP	GO:0001676	long-chain fatty acid metabolic process	16/472	97/17962	4.51e-09	1.99e-05	1.75e-05	Acot1/Acot2/Acot3/Acot4/Acsl6/Adtrp/Bdkrb1/Cpt1a/Cyp2a1/Cyp2b21/Cyp2e1/Elovl6/Gsta1/Lipe/Mgll/Pnpla3	16	1.5
	BP	GO:0006631	fatty acid metabolic process	28/472	379/17962	9.48e-07	0.002	0.002	Abhd1/Acot1/Acot2/Acot3/Acot4/Acox2/Acsl6/Adtrp/Atp6v1b1/Bdkrb1/Ceacam1/Cnr1/Cpt1a/Cyp2a1/Cyp2b21/Cyp2e1/Decr1/Elovl6/Gsta1/Hnf1a/Ivd/Lipe/Mgll/Nr4a3/Pdk4/Pnpla3/Twist1/Ucp3	28	0.755929
	BP	GO:0019216	regulation of lipid metabolic process	25/472	354/17962	8.01e-06	0.005	0.004	Abhd6/Angptl4/Apoh/Ccdc3/Ceacam1/Cnr1/Cpt1a/Disp3/F2/Fgf19/Fshb/Htr2b/Kcnma1/Mvk/Nr4a3/Pc/Pdk4/Ppp2r5a/Rora/Sik1/Socs7/Star/Tcf7l2/Twist1/Wnt4	25	0.6
	BP	GO:0008277	regulation of G protein-coupled receptor signaling pathway	13/472	132/17962	4.54e-05	0.008	0.007	Abhd6/Adcyap1/Aipl1/Alk/Apln/Aplp1/Arr3/Calcr/F2/Gprasp1/Htr2b/Mgll/Rgs8	13	0.27735
	BP	GO:0046486	glycerolipid metabolic process	22/472	335/17962	8.25e-05	0.012	0.011	Abhd6/Acsl6/Apoh/Cpt1a/Cwh43/Cyp2e1/Dgki/Dpep1/Htr2b/Impa2/Lipe/Mgll/Mttp/Pigp/Pigq/Pik3c2g/Pik3cd/Pnpla3/Sh3yl1/Sik1/Socs7/Tcf7l2	22	0.852803
	BP	GO:0042180	cellular ketone metabolic process	16/472	204/17962	1.02e-04	0.013	0.011	Cacna1h/Cbr3/Ceacam1/Cnr1/Cpt1a/Fgf19/Kcnma1/Kmo/Kyat3/Nr4a3/Oxct1/Pdk4/Srd5a2/Star/Twist1/Wnt4	16	-0.5
	BP	GO:0045956	positive regulation of calcium ion-dependent exocytosis	6/472	32/17962	1.62e-04	0.017	0.015	Cacna1h/Cadps/Cdk5r2/Cnr1/Syt2/Syt7	6	-1.63299
	BP	GO:0032967	positive regulation of collagen biosynthetic process	5/472	32/17962	0.001	0.054	0.048	F2/Scx/Serpine1/Ucn/Wnt4	5	-0.447214
	CC	GO:0097060	synaptic membrane	28/475	494/18446	8.82e-05	0.022	0.019	Abhd6/Atp1a3/Cacna1h/Camk2n1/Cnr1/Cntnap1/Cntnap2/Dgki/Drd5/Fosl1/Gabrb2/Glrb/Grik2/Grip2/Htr3b/Htr7/Kcna4/Kcnc3/Kcnj4/Kcnma1/Nrcam/Nrp2/Nrxn1/Ntrk2/Scn1a/Shisa7/Syt7/Unc13c	28	-1.13389
	CC	GO:1902495	transmembrane transporter complex	20/475	315/18446	2.07e-04	0.022	0.019	Abcg8/Abhd6/Atp1a3/Cacna1h/Cacna2d3/Cacng1/Catsper2/Cntnap1/Cntnap2/Dpp6/Gabrb2/Glrb/Grik2/Htr3b/Kcna4/Kcnc3/Kcnma1/Scn1a/Shisa7/Unc80	20	-0.894427
	CC	GO:0034703	cation channel complex	16/475	222/18446	2.16e-04	0.022	0.019	Abhd6/Cacna1h/Cacna2d3/Cacng1/Catsper2/Cntnap1/Cntnap2/Dpp6/Grik2/Htr3b/Kcna4/Kcnc3/Kcnma1/Scn1a/Shisa7/Unc80	16	-1
	CC	GO:0031012	extracellular matrix	21/475	362/18446	4.87e-04	0.024	0.021	Acan/Col11a1/Col6a6/Colq/Elfn2/F2/Gfod2/Gpc3/Hapln2/Il1rl1/Mmp19/Mmp3/Nepn/Ntn1/Podnl1/RGD1562885/Serpine1/Sfrp1/Sfrp2/Wnt11/Wnt4	21	1.52753
	CC	GO:0034702	ion channel complex	18/475	295/18446	6.77e-04	0.027	0.024	Abhd6/Cacna1h/Cacna2d3/Cacng1/Catsper2/Cntnap1/Cntnap2/Dpp6/Gabrb2/Glrb/Grik2/Htr3b/Kcna4/Kcnc3/Kcnma1/Scn1a/Shisa7/Unc80	18	-0.942809
	CC	GO:0005777	peroxisome	11/475	142/18446	0.001	0.034	0.030	Acot4/Acox2/Acsl6/Fndc5/Idi1/Mvk/Nudt7/Pex11a/Pxmp2/Pxmp4/Syt7	11	-0.904534
	MF	GO:0001653	peptide receptor activity	14/453	154/16882	7.06e-05	0.036	0.032	Bdkrb1/Bdkrb2/Calcr/Cckar/Ednra/Gcgr/Gpr75/Gucy2d/Hcrtr2/Npy2r/Npy5r/Prokr2/Sctr/Uts2r	14	-1.60357
	MF	GO:0008528	G protein-coupled peptide receptor activity	13/453	145/16882	1.46e-04	0.036	0.032	Bdkrb1/Bdkrb2/Calcr/Cckar/Ednra/Gcgr/Gpr75/Hcrtr2/Npy2r/Npy5r/Prokr2/Sctr/Uts2r	13	-1.38675
	MF	GO:1901681	sulfur compound binding	18/453	250/16882	1.48e-04	0.036	0.032	Aplp1/Apoh/Atp1a3/Col11a1/Colq/Cxcl11/Dbt/F2/Gpnmb/Gsta1/Nrp2/Pc/Pnpla3/RGD1562885/Sema5a/Sfrp1/Sult1a1/Zfp207	18	0.942809
	MF	GO:0047372	acylglycerol lipase activity	4/453	12/16882	2.13e-04	0.038	0.035	Abhd1/Abhd6/Lipe/Mgll	4	2
	MF	GO:0016289	CoA hydrolase activity	5/453	24/16882	3.79e-04	0.054	0.049	Acot1/Acot2/Acot3/Acot4/Nudt7	5	2.23607
	MF	GO:0005539	glycosaminoglycan binding	15/453	209/16882	5.37e-04	0.064	0.058	Acan/Aplp1/Apoh/Col11a1/Colq/Cxcl11/F2/Gpnmb/Hapln2/Nrp2/RGD1562885/Sema5a/Sfrp1/Trem2/Zfp207	15	0.774597
GSE6880-GO terms	Ontology	ID	Description	GeneRatio	BgRatio	pvalue	p.adjust	qvalue	geneID	Count	zscore
	BP	GO:0001666	response to hypoxia	35/430	424/17962	1.99e-10	8.69e-07	7.11e-07	Abat/Acot2/Aldoc/Alkbh5/Ang/Atp7a/Bcl2l1/Bdkrb2/Bnip3/Cited2/Crp/Cxcl12/Cyp1a1/Dpp4/Eif4ebp1/Fabp1/Fndc1/Fosl2/Hk2/Hp/Igfbp3/Lepr/Lipc/Ndrg1/Nos2/Nppa/Oprd1/Pak1/Pklr/Ptgis/S100b/Slc2a4/Slc9a1/Tgfbr3/Trpc6	35	2.87352
	BP	GO:0007218	neuropeptide signaling pathway	12/430	99/17962	4.28e-06	0.001	0.001	Gal/Glra2/Glrb/Nmur1/Npffr2/Nppa/Npy2r/Oprd1/Prlhr/Prok2/Prokr1/Sstr2	12	1.73205
	BP	GO:0000302	response to reactive oxygen species	21/430	295/17962	9.45e-06	0.002	0.002	Agap3/Arg1/Atp7a/Bcl2l1/Bnip3/Col1a1/Crp/Cyp2e1/Dnm2/Egfr/Erbb4/Fabp1/Fer/Fkbp1b/Hp/Olr1/Pdgfd/Sesn1/Star/Tpm1/Trpc6	21	2.4004
	BP	GO:1901654	response to ketone	22/430	391/17962	2.00e-04	0.010	0.008	Arg1/Bcl2l1/Bdh1/Cacna1b/Ccnd1/Ccnd2/Crp/Egfr/Eif4ebp1/Erbb4/Fibin/Fosl2/Hmgcs2/Ifnb1/Klf9/Lepr/Maob/Mstn/Nme1/Nos2/Star/Tgfbr3	22	0.852803
	BP	GO:0032868	response to insulin	19/430	326/17962	3.47e-04	0.014	0.011	Apobec1/Bdh1/Ccnd2/Eif4ebp1/Fer/Gal/Hmgcs2/Igfbp3/Inhbb/Insig1/Marcks/Mstn/Nppa/Pak1/Pklr/Slc27a1/Slc2a4/Slc9a1/Star	19	1.14708
	BP	GO:0003018	vascular process in circulatory system	14/430	209/17962	5.31e-04	0.016	0.013	Adra1b/Adra1d/Apln/Avpr2/Bdkrb2/Crp/Egfr/Fgb/Hrh1/Htr1d/Nppa/Olr1/Ptgis/Vip	14	0.534522
	BP	GO:0001676	long-chain fatty acid metabolic process	8/430	97/17962	0.002	0.042	0.035	Acot1/Acot2/Acot4/Alox15/Cyp2b21/Cyp2e1/Elovl6/Slc27a1	8	2.82843
	BP	GO:0008202	steroid metabolic process	16/430	298/17962	0.002	0.043	0.035	Cel/Cyp1a1/Cyp26b1/Cyp2e1/Cyp3a23/3a1/Cyp7b1/Gal/Hmgcs2/Hrh1/Insig1/Lepr/Lipc/Sqle/Star/Sult1a1/Sult1b1	16	1.5
	BP	GO:2001233	regulation of apoptotic signaling pathway	19/430	421/17962	0.006	0.078	0.064	Bcl2l1/Bdkrb2/Bik/Bnip3/Brca1/Casp8/Cd44/Cxcl12/Dapk1/Fgb/G0s2/Ifnb1/Inhbb/Itga6/Nrp1/Nupr1/Ret/St18/Tmbim1	19	1.14708
	CC	GO:0062023	collagen-containing extracellular matrix	28/439	217/18446	3.35e-13	1.50e-10	1.23e-10	Ang/Cask/Ccdc80/Col18a1/Col1a1/Col1a2/Col3a1/Col5a1/Col5a3/Colq/Entpd1/Fbn1/Fbn2/Gpc3/Impg2/Itga6/Kazald1/Lad1/Lama3/Lama4/Loxl1/Lum/Omd/Tgfbr3/Tnr/Vcan/Zp1/Zp3	28	-2.26779
	CC	GO:0031012	extracellular matrix	31/439	362/18446	8.14e-10	1.83e-07	1.49e-07	Ang/Cask/Ccdc80/Col18a1/Col1a1/Col1a2/Col3a1/Col5a1/Col5a3/Col6a3/Col8a1/Colq/Entpd1/Fbn1/Fbn2/Gpc3/Il1rl1/Impg2/Itga6/Kazald1/Lad1/Lama3/Lama4/Loxl1/Lum/Omd/Tgfbr3/Tnr/Vcan/Zp1/Zp3	31	-2.33487
	CC	GO:0045121	membrane raft	22/439	396/18446	2.21e-04	0.007	0.006	Adra1b/Atp7a/Cask/Casp8/Cel/Cnr1/Dpp4/Egfr/Erbb4/Kcnn4/Kcnq3/Myadm/Olr1/Oprd1/Prss8/Ptgis/Ret/Serpinh1/Slc27a1/Slc2a4/Slc9a1/Tnr	22	-1.70561
	CC	GO:0034702	ion channel complex	17/439	295/18446	7.48e-04	0.017	0.014	Cacna1b/Cacna1s/Chrna5/Chrnb1/Cnga4/Fkbp1b/Glra2/Glrb/Kcna6/Kcnb2/Kcnq3/Kcns2/Scn3a/Scn4b/Shank1/Shank2/Trpc6	17	0.727607
	CC	GO:0043292	contractile fiber	13/439	240/18446	0.005	0.055	0.044	Actg1/Ankrd23/Cacna1s/Fkbp1b/Homer1/Jph2/Myh1/Myh6/Myh7/Pak1/Pdlim2/Rpl7/Tpm1	13	0.83205
	CC	GO:0005741	mitochondrial outer membrane	9/439	151/18446	0.010	0.084	0.068	Arg1/Bcl2l1/Bnip3/Cnr1/Dmpk/Hk2/Maob/Mgst1/Nme1	9	-0.333333
	MF	GO:0046873	metal ion transmembrane transporter activity	28/409	428/16882	2.05e-06	7.34e-04	6.17e-04	Asic4/Atp1a4/Atp7a/Cacna1b/Cacna1s/Cnr1/Jph2/Kcna6/Kcnab3/Kcnb2/Kcnh6/Kcnj9/Kcnk12/Kcnn4/Kcnq3/Kcns2/Scn3a/Scn4b/Slc10a1/Slc12a1/Slc12a3/Slc13a1/Slc1a1/Slc23a2/Slc4a10/Slc9a1/Tpcn2/Trpc6	28	1.51186
	MF	GO:0005516	calmodulin binding	16/409	169/16882	3.63e-06	8.67e-04	7.29e-04	Cacna1s/Cask/Dapk1/Egfr/Gap43/Iqgap3/Kcnn4/Kcnq3/Marcks/Myh6/Myh7/Nos2/Plcb1/Scn3a/Slc9a1/Syt7	16	-0.5
	MF	GO:0022839	ion gated channel activity	22/409	326/16882	1.60e-05	0.003	0.002	Cacna1b/Cacna1s/Chrna5/Chrnb1/Cnga4/Cnr1/Gabrq/Glra2/Glrb/Jph2/Kcna6/Kcnab3/Kcnb2/Kcnh6/Kcnj9/Kcnk12/Kcnn4/Kcnq3/Kcns2/Scn3a/Scn4b/Tpcn2	22	0.852803
	MF	GO:0001664	G protein-coupled receptor binding	19/409	292/16882	9.77e-05	0.004	0.003	Apln/Arr3/Arrb1/Bdkrb2/Ccl22/Cxcl12/Cxcl3/Dnm2/Gal/Homer1/Magi3/Nes/Npffr2/Nppa/Prok2/Ramp3/Reep1/Sag/Shank1	19	-0.229416
	MF	GO:1901681	sulfur compound binding	16/409	250/16882	4.11e-04	0.010	0.009	Ang/Ccdc80/Col5a1/Col5a3/Colq/Fbn1/Gpnmb/Impg2/Lipc/Mgst1/Mstn/Nrp1/Pcolce/Ptprs/Sult1a1/Tgfbr3	16	0
