# Supplementary material for: Role of mitochondrial metabolic disorder and immune infiltration in diabetic cardiomyopathy: new insights from bioinformatics analysis
Source: J Transl Med. 2023 Feb 1;21:66. doi: 10.1186/s12967-023-03928-8 (PMC9893675; doi:10.1186/s12967-023-03928-8)
Supplement: Supplementary file 7 — Additional file 7: Table S6. Hub MitoDEGs explored by MCODE and CytoHubba. [file 12967_2023_3928_MOESM7_ESM.xlsx]

## Sheet: Sheet1
Additional file 7: Table S6. Hub MitoDEGs explored by MCODE and CytoHubba.
MCODE	MCODE::Clusters (1)	MCODE::Node Status (1)	MCODE::Score (1)	name	selected	shared name
	Cluster 1	Clustered	4	Acsl6	FALSE	Acsl6
	Cluster 1	Clustered	3.2381	Acadsb	FALSE	Acadsb
	Cluster 1	Clustered	3.2381	Decr1	FALSE	Decr1
	Cluster 1	Clustered	4	Ivd	FALSE	Ivd
	Cluster 1	Clustered	4	Oxct1	FALSE	Oxct1
	Cluster 1	Seed	4	Gpam	FALSE	Gpam
	Cluster 1	Clustered	4	Pdk4	FALSE	Pdk4
	Cluster 1	Clustered	3.2381	Hmgcs2	FALSE	Hmgcs2
	Cluster 1	Clustered	4	Acot2	FALSE	Acot2
HUBBA	Top 10 in network string_interactions_short.tsv ranked by MCC method
	Rank	Name	Score
	1	Cpt1a	94
	2	Hsd17b4	85
	3	Hmgcs2	65
	4	Acadsb	61
	5	Decr1	58
	6	Acot2	49
	7	Gpam	40
	8	Oxct1	39
	9	Acsl6	33
	10	Ivd	32
