# Supplementary material for: Role of mitochondrial metabolic disorder and immune infiltration in diabetic cardiomyopathy: new insights from bioinformatics analysis
Source: J Transl Med. 2023 Feb 1;21:66. doi: 10.1186/s12967-023-03928-8 (PMC9893675; doi:10.1186/s12967-023-03928-8)
Supplement: Supplementary file 9 — Additional file 9: Table S8. Hub MitoDEGs regulated by miRNAs. [file 12967_2023_3928_MOESM9_ESM.xlsx]

## Sheet: miRWalk_mRNA-miRNA预测
Additional file 9: Table S8. Hub MitoDEGs regulated by miRNAs.
mirnaid	refseqid	genesymbol	duplex	start	end	bindingp	energy	seed	accessibility	au	phylopstem	phylopflank	me	number_of_pairings	binding_region_length	longest_consecutive_pairings	position
rno-miR-150-3p	NM_001127580	Oxct1	CTGGTACAGGCCTGGGGGA#TGCCCCAGGCTGCTAA#.((((...(((((((((.(#).))))))))))))).	1678	1694	0.961538	-21.6	0	0.00478279	0.647	-0.0898837	0.640619	-9.55161	14	16	13	3UTR
rno-miR-331-3p	NM_001127580	Oxct1	GCCCCTGGGCCTATCCTAGAA#TCTATGTAGGACTGCTTTTTCTGGATGGCCACAGGGT#..(((((((((.((((.((((#.)))))))))))).))))).	2975	3012	0.980769	-25.7	1	0.000263458	0.515	-0.0534101	0.108846	-8.3038	17	20	12	3UTR
rno-miR-881-3p	NM_001127580	Oxct1	TAACTGTGGCATTTCTGAATAG#TCAGAAGTGGCCACAA#....((((((((((((((....#))))))))).))))).	2709	2725	0.991453	-20	0	0.000535852	0.5	0.0596528	-0.0419945	-9.54656	14	16	9	3UTR
rno-miR-330-3p	NM_001127580	Oxct1	GCAAAGCACAGGGCCTGCAGAGA#CTCAGATCGGAGTAGTCAGTTAGCAGGCTTTGTGTG#.....(((((((((((((.....#.))))))))))))).	2631	2667	1	-23.8	0	0.000435814	0.559	0.250153	0.153283	-13.6656	13	15	13	3UTR
rno-miR-331-3p	NM_001127580	Oxct1	GCCCCTGGGCCTATCCTAGAA#TGGGAAAGGCTCAGATCGGAGTA#((((((((((((.(((((...#))))).))))))))...)).)).	2622	2645	1	-22	1	0.000302835	0.5	0.264578	0.125969	-5.22671	17	23	8	3UTR
rno-miR-342-5p	NM_001127580	Oxct1	AGGGGTGCTATCTGTGATTGAG#TCACTCCAGAAGCACCCTTT#(((((((((.((((.((.(((.#))).))))))))))))))).	2747	2767	1	-23.1	1	0.0277679	0.471	0.20388	-0.0982539	-5.91553	18	20	15	3UTR
rno-miR-129-5p	NM_001127580	Oxct1	CTTTTTGCGGTCTGGGCTTGC#AGGCTCAGATCGGAGT#....((.((((((((((((..#)))))))))))).)).	2628	2644	1	-19.8	0	0.000272343	0.5	0.109661	0.143091	-11.0902	14	16	12	3UTR
rno-let-7i-5p	NM_001127580	Oxct1	TGAGGTAGTAGTTTGTGCTGTT#AGGGCATAGGCTCTACCA#...(((((.((((((((((.(.#).))))))))))))))).	2178	2196	1	-20.9	0	5.67255e-05	0.559	-0.160117	0.319747	-7.57093	16	18	15	3UTR
rno-let-7i-3p	NM_001127580	Oxct1	CTGCGCAAGCTACTGCCTTGCT#AGTAAACACAGTAGCTTGTGTT#..(((((((((((((..(((((#)))))...))))))))))))).	2671	2693	1	-23.3	1	6.01649e-05	0.529	-0.231533	0.0273106	-5.19005	18	22	13	3UTR
rno-miR-22-3p	NM_001127580	Oxct1	AAGCTGCCAGTTGAAGAACTGT#GACTGGACAGCTG#.(((((((((((..........#)))))).))))).	2804	2817	1	-17	1	6.78004e-06	0.544	0.177608	0.0925389	-6.90779	11	13	6	3UTR
rno-miR-24-1-5p	NM_001127580	Oxct1	GTGCCTACTGAGCTGATATCAG#CTGGTGTCTATACAGTGAAACATATTGTCCTTCTGGCACT#((((((((((....((((((((#))))))))....))))).................))))).	2814	2854	1	-19.7	1	0.000703783	0.632	0.136236	0.0741935	-12.2551	18	40	8	3UTR
rno-miR-26b-3p	NM_001127580	Oxct1	CCTGTTCTCCATTACTTGGCTC#AGCTAAGGATGGGAAGAGGA#(((.(((.(((((.(((((((.#))))))))))))))).))).	2265	2285	1	-22.6	0	0.000296923	0.574	0.171354	0.296138	-10.1401	18	20	15	3UTR
rno-miR-30c-1-3p	NM_001127580	Oxct1	CTGGGAGAGGGTTGTTTACTCC#AAGCATCCTCTGCCAGT#((((.((((((.(((((.....#))))))))))).)))).	3015	3032	1	-20.7	0	1.73318e-05	0.515	-0.145816	0.122707	-11.4034	15	17	11	3UTR
rno-miR-30b-3p	NM_001127580	Oxct1	CTGGGATGTGGATGTTTACGTC#GACGGCAAACAGGAGCATCCCT#..(((((((...(((((.((((#))))..)))))...))))))).	2131	2153	1	-21.6	1	0.000494496	0.574	-0.0433862	0.0147722	-12.3711	16	22	7	3UTR
rno-miR-31a-5p	NM_001127580	Oxct1	AGGCAAGATGCTGGCATAGCTG#GTGCTGGCATCCCACCAAATATTGCCTT#(((((((((((((((((.....#)))))))))))..........)))))).	2196	2224	1	-21.9	1	0.0548942	0.544	0.519673	0.0321166	-3.93757	17	28	11	3UTR
rno-miR-34b-5p	NM_001127580	Oxct1	AGGCAGTGTAATTAGCTGATTGT#GCTGGTTATGCTTGCCTC#((((((((((((((((.......#)))))))))))).)))).	2069	2087	1	-20.1	1	0.00368366	0.559	0.24844	0.0716232	-3.93757	16	18	12	3UTR
rno-miR-127-3p	NM_001127580	Oxct1	TCGGATCCGTCTGAGCTTGGCT#AGCCTTATCTGTGCTGGGAATGATGGGAAAGGCTCAGATCGGAG#.....(((((((((((((..((#.))..))))))))).)))).	2599	2643	1	-22.2	0	0.000244201	0.515	0.00948971	0.15206	-13.6656	15	20	9	3UTR
rno-miR-128-2-5p	NM_001127580	Oxct1	GGGGGCCGATGCACTGTAAGA#TCTACCAGTGCTGGCATCCCA#((((((((..((((((..(((#)))..)))))))))).)))).	2189	2210	1	-22.8	1	0.00153277	0.529	0.402616	0.168464	-6.23647	17	21	10	3UTR
rno-miR-130a-5p	NM_001127580	Oxct1	GCTCTTTTCACATTGTGCTACT#TAGCCACAGTTGACCTATACATGATGTGAAAGGAA#..(((((((((((((((.....#.))))))))))))))).	2915	2950	1	-18.8	1	0.0207679	0.603	0.122707	0.172444	-4.957	15	17	15	3UTR
rno-miR-141-5p	NM_001127580	Oxct1	TCCATCTTCCAGTGCAGTGTTG#TAACAAAGTGCTATTACTTTAGCCTTATCTGTGCTGGGAATGATGGGA#(((((((((((((((((.....#.)))))))))))..)))))).	2579	2627	1	-23.2	1	0.000835506	0.544	0.216087	0.207504	-3.93757	17	21	11	3UTR
rno-miR-145-5p	NM_001127580	Oxct1	GTCCAGTTTTCCCAGGAATCCCT#GGTGTCCTGAAGCTAGACTGGACA#(((((((((...(((((..((..#))..))))).....))))))))).	2789	2813	1	-23.6	1	0.000166796	0.559	-0.0606567	0.0990617	-11.3517	16	24	9	3UTR
rno-miR-150-3p	NM_001127580	Oxct1	CTGGTACAGGCCTGGGGGA#TCTCTCCAGTGTGATGTATCAGT#((((((((.((((((((((#)))).)))).))..)))))))).	1819	1842	1	-21.1	1	0.0143051	0.603	0.32874	0.201707	-4.99396	18	23	8	3UTR
rno-miR-152-3p	NM_001127580	Oxct1	TCAGTGCATGACAGAACTTGG#GGGTGTGCTATATCTTTGTATTCTGAAGACTCTGTTTCTGCATTGAG#((((((((.((((((......#.))))))..)))))))).	2329	2376	1	-17.9	1	0.00129279	0.662	0.195443	0.256149	-5.22701	14	18	8	3UTR
rno-miR-193a-5p	NM_001127580	Oxct1	TGGGTCTTTGCGGGCAAGATGA#CATTCTGCTCAGCAAAGATTG#..((((((((((((((.((((.#)))).))))).))))))))).	2508	2529	1	-21.3	1	0.0143788	0.603	0.0410364	0.126426	-4.957	18	21	9	3UTR
rno-miR-193a-5p	NM_001127580	Oxct1	TGGGTCTTTGCGGGCAAGATGA#CATCTTAGAAGGTCCAAGGCCCAT#((((((((...((((((((((.#)))))).....)))))))))))).	3048	3072	1	-20.5	1	0.000457663	0.574	-0.00557573	0.25031	-9.06125	18	24	12	3UTR
rno-miR-200b-5p	NM_001127580	Oxct1	CATCTTACTGGGCAGCATTGGA#TCCATTCTGCTCAGCAAAGATT#.(((((.((((((((.(.((((#)))).)))))))))..))))).	2506	2528	1	-19.6	0	0.0186696	0.603	-0.0891307	0.122238	-5.57006	18	22	9	3UTR
rno-miR-206-3p	NM_001127580	Oxct1	TGGAATGTAAGGAAGTGTGTGG#CATGCACTTGCTTATCATTCCAG#(((((((((((.(((((((((.#))))))))).)))).))))))).	3143	3166	1	-26.5	1	0.0518912	0.632	0.60431	0.196904	-7.28438	20	23	9	3UTR
rno-miR-208a-5p	NM_001127580	Oxct1	GAGCTTTTGGCCCGGGTTATAC#ATGGCCACAGGGTTGAAAGCATCC#((((((((((((((((((((..#)))))).).))))))))))).)).	2999	3023	1	-22	1	0.000577473	0.5	0.265642	0.0309797	-3.93757	20	24	11	3UTR
rno-miR-216a-5p	NM_001127580	Oxct1	TAATCTCAGCTGGCAACTGTGA#ACAGTTGCCAGG#.........(((((((((((..#))))))))))).	2730	2742	1	-20	0	0.0232726	0.485	-0.133463	-3.7875e-06	-20.4803	11	12	11	3UTR
rno-miR-222-5p	NM_001127580	Oxct1	GGCTCAGTAGCCAGTGTAGAT#ATGCTGGTTATGCTTGCCT#(((...(((((((((((....#)))))))))))....))).	2067	2086	1	-19.1	0	0.00308538	0.559	0.241432	0.13522	-12.9896	14	19	11	3UTR
rno-miR-291a-3p	NM_001127580	Oxct1	AAAGTGCTTCCACTTTGTGTGCC#GGCCACAGGGTTGAAAGCATC#...(((((((.((((((((.(((#))))))))))).))).)))).	3001	3022	1	-21.4	0	0.000735926	0.5	-0.0330256	0.0790855	-9.33931	18	21	11	3UTR
rno-miR-320-5p	NM_001127580	Oxct1	GCCTTCTCTTCCCGGTTCTTCC#AAGGATGGGAAGAGGATGGG#.((((((((((((.((((((..#)))))))))))))))).)).	2269	2289	1	-22.6	1	2.85996e-05	0.559	0.263265	0.162682	-4.65016	18	20	16	3UTR
rno-miR-383-5p	NM_001127580	Oxct1	CAGATCAGAAGGTGACTGTGG#CCACAGTTGACCTATACATGATGTGA#((.((((..((((((((((((#)))))))).)))).....)))).)).	2918	2944	1	-21.2	0	0.0236928	0.603	0.252662	0.176113	-8.86514	18	26	8	3UTR
rno-miR-501-3p	NM_001127580	Oxct1	AATGCACCCGGGCAAGGATTTGG#GTCTTTGTCATTGGTGCT#...(((((..(((((((((....#)))))))))...))))).	1904	1922	1	-19.1	0	0.000724104	0.618	0.406898	0.0248901	-8.81344	14	18	9	3UTR
rno-miR-377-5p	NM_001127580	Oxct1	AGAGGTTGCCCTTGGTGAATTC#TTGCCAGGGGCCATCA#...(((.(((((((((((....#))))))))))).))).	2734	2750	1	-21	0	3.02232e-05	0.5	-0.397341	0.00284994	-8.05823	14	16	11	3UTR
rno-miR-377-3p	NM_001127580	Oxct1	TGAATCACACAAAGGCAACTTTT#GAAGGTTGTCTTTGTCATTGGTGCTCAC#(((((((.(((((((((((((((#)))))))))))))))...))))..))).	1897	1925	1	-19.7	1	0.000742337	0.618	0.623596	0.0200721	-6.25121	22	28	15	3UTR
rno-miR-540-3p	NM_001127580	Oxct1	AGGTCAGAGGTCGATCCTGGGC#GCCACAGGGTTGAAAGCATCCTCTGCCA#.((.((((((((((((((((((#))).)))))))))......)))))))).	3002	3030	1	-29.1	0	3.66824e-05	0.529	0.202286	0.0986541	-6.82535	20	28	9	3UTR
rno-miR-493-5p	NM_001127580	Oxct1	TTGTACATGGTAGGCTTTCATT#AGGCTCTACCAGTGCT#..((((.((((((((((.....#)))).)))))))))).	2185	2201	1	-17.3	0	0.000509198	0.559	-0.0353769	0.300957	-6.50069	14	16	10	3UTR
rno-miR-20b-3p	NM_001127580	Oxct1	ACTGCAGTGTGAGCACTTCTGG#TCATTGGTGCTCACAGTGGAT#..(.((.((((((((((..(((#)))..)))))))))).)).).	1911	1932	1	-21.6	0	0.000251541	0.662	0.757214	0.0639152	-9.53271	16	21	10	3UTR
rno-miR-871-3p	NM_001127580	Oxct1	TGACTGGCACCATACTGGATAA#TCCAGTGTGATGTATCAGTTC#.((((((((.(((((((((...#))))))))).)))..))))).	1823	1844	1	-20.4	1	0.0471246	0.618	0.167072	0.21038	-5.03583	17	21	9	3UTR
rno-miR-881-3p	NM_001127580	Oxct1	TAACTGTGGCATTTCTGAATAG#TTCTGGATGGCCACAGG#...(((((((..(((.(((...#))).)))..))))))).	2993	3010	1	-18.5	0	0.000286653	0.515	0.193526	0.103546	-12.9192	13	17	7	3UTR
rno-miR-181d-3p	NM_001127580	Oxct1	CCACCGGGGGATGAATGTCA#TGATATTCCAAGAGATCCCCCT#.....(((((((((((((((#))))))))......))))))).	2475	2497	1	-19.9	0	0.00958536	0.618	-0.120474	0.251849	-13.6656	15	22	8	3UTR
rno-miR-673-3p	NM_001127580	Oxct1	TCCGGGACTGAGTTCTGTGCAC#GCATAGGCTCTACCAGTGCTGGC#.((((.((((.(((((((((..#)))))))....)))))).)))).	2181	2204	1	-21.3	0	2.5e-05	0.544	0.0290415	0.280721	-8.51906	17	23	7	3UTR
rno-miR-708-5p	NM_001127580	Oxct1	AAGGAGCTTACAATCTAGCTGGG#TCCAGTGTGATGTATCAGTTCCA#..(((((((((.(((..((((((#))))))..))))))..)))))).	1823	1846	1	-20.9	1	0.0361219	0.632	0.213401	0.150637	-8.53685	18	23	6	3UTR
rno-miR-551b-3p	NM_001127580	Oxct1	GGCGACCCATACTTGGTTTCAGT#GCTGAAGCTAAGGATGGGAAGA#..(..((((..((((((((((((#))))))))))))..))))..).	2260	2282	1	-24.9	0	0.00430382	0.559	-0.0534816	0.334682	-16.1753	17	22	12	3UTR
rno-miR-667-5p	NM_001127580	Oxct1	CGGTGCTGGTGGAGCAGTGAGCAC#GCATAGGCTCTACCAGTGCTGG#(((((((((((((((..((.((..#)).)).))))))))))))))).	2181	2203	1	-29.7	1	1.81828e-05	0.544	0.173925	0.29373	-4.17062	19	22	15	3UTR
rno-miR-496-5p	NM_001127580	Oxct1	AGGTTGTCCATGGTGTGTTC#ACCATGGGCAATTC#.(((((((((((((......#))))))))))))).	2418	2432	1	-19.3	1	0.00556991	0.618	0.393719	0.106794	-4.76182	13	14	13	3UTR
rno-miR-449c-5p	NM_001127580	Oxct1	AGGCAGTGCATTGCTAGCTGG#GCTGGTTATGCTTGCCTC#((((((.((((.((((((...#)))))).)))))))))).	2069	2087	1	-22.3	0	0.00368366	0.559	0.203473	0.0668054	-8.82806	16	18	10	3UTR
rno-miR-3550	NM_001127580	Oxct1	CCGAGCCCATCCCTGCCCTAG#GGGAAGAGGATGGGA#.....(((((((((.(((...#))).)).))))))).	2275	2290	1	-20.9	0	2.73899e-05	0.544	0.229169	0.14341	-14.401	12	15	7	3UTR
rno-miR-344b-5p	NM_001127580	Oxct1	AGTCAGGCTGCTGGTTATATTC#GAGTAAACACAGTAGCTTGT#...(((((((((((((.(((((#)))))))).)))))))))).	2670	2690	1	-20	0	2.11909e-06	0.544	0.11665	0.04321	-6.51454	18	20	10	3UTR
rno-miR-3558-3p	NM_001127580	Oxct1	ACTGTGGAGGGTTTCTATGT#TCCTCCATAGTA#(((((((((((.........#))))))))))).	2960	2972	1	-17.6	1	1.08764e-06	0.603	-0.189796	0.0835701	-10.3988	11	12	11	3UTR
rno-miR-3559-5p	NM_001127580	Oxct1	TGACAGACTTAGTACTACATGA#TCATGAGTGCTAAGAAGGTTGTCTTTGTCAT#((((((((((((((((.(((((#)))))))))))))).........))))))).	1884	1915	1	-21.4	1	0.00410513	0.588	0.475076	0.0446434	-3.93757	21	31	14	3UTR
rno-miR-3568	NM_001127580	Oxct1	TGTTCTTCCCGTGCAGAAGCAG#CTGTTTCTGCATTGAGCT#.((((.....((((((((((((#)))))))))))).)))).	2360	2378	1	-19.2	0	0.00112168	0.647	0.0300278	0.326491	-11.8505	16	18	12	3UTR
rno-miR-1949	NM_001127580	Oxct1	TATACCAGGATGTCAGCATAGTT#GGCTCTACCAGTGCTGGCATCCC#.......((((((((((((....#.)))))))))))).	2186	2209	1	-21.4	0	0.00163753	0.529	-0.0566927	0.267713	-17.1102	12	14	12	3UTR
rno-miR-3068-5p	NM_001127580	Oxct1	TTGGAGTTCATGCAAGTTCTAACCA#TGCATTGAGCTCCAGT#((((((((((((((...........#))))).))))))))).	2367	2383	1	-19.3	1	5.94095e-05	0.632	-0.0162232	0.246513	-4.90607	14	16	9	3UTR
rno-miR-3473	NM_001127580	Oxct1	TCTAGGGCTGGAGAGATGGCTA#GGGCATAGGCTCTACCAGTGCTGGC#.((((.((((((((((((.((.#)).)))...)))).))))).)))).	2179	2204	1	-22.3	0	2.5e-05	0.544	0.0364537	0.27494	-5.69428	18	25	5	3UTR
rno-miR-6318	NM_001127580	Oxct1	CTGCCTGGCGCAGGGCCTGTAG#GCAGGCTTTGTGTGACAGAGTAA#.(((((((((((((((((((..#)))))))))))))..))).))).	2653	2676	1	-25.6	1	0.000131736	0.544	0.148206	0.105585	-3.79332	19	23	13	3UTR
rno-miR-1298	NM_001127580	Oxct1	TTCATTCGGCTGTCCAGATGTA#TAGACTGGACAGCTGGTGTCTATACAGTGAAA#(((((((((((((((((.(.((#)).)))))))))))))..........))))).	2802	2834	1	-21.7	1	0.0183467	0.574	0.132612	0.0778625	-3.93757	20	32	13	3UTR
rno-miR-6325	NM_001127580	Oxct1	AAAGTCAGACAGAGACTCTGCAG#CGGAGTAGTCAGTTAGCAGGCTTTGTGTGACA#...((((.((((((.(.((((..#.))))))))))).)))).	2638	2670	1	-21.3	0	8.56809e-05	0.559	-0.265402	0.186305	-9.56362	15	18	11	3UTR
rno-miR-148a-5p	NM_001127580	Oxct1	AAAGTTCTGAGACACTCTGACTC#GACAAGGAGGTTCTTAGAACA#...(((((((((..((((.....#.))))..))))))))).	3179	3200	1	-17.9	0	0.000274517	0.647	0.196632	0.331438	-8.66051	13	17	9	3UTR
rno-miR-193b-5p	NM_001127580	Oxct1	GGGGTTTTGAGGGCGAGA#CCTCAAAACCTG#.(((((((((((......#))))))))))).	3207	3219	1	-17.7	1	0.0901314	0.662	-0.177936	0.354675	-6.90779	11	12	11	3UTR
rno-miR-676	NM_001127580	Oxct1	CCGTCCTGAGCTTGTCGAGCTA#AGCTGAAGCTAAGGATGGG#(((((((.((((..((.((((.#)))))))))).))))))).	2259	2278	1	-21.5	1	0.00493184	0.574	-0.335215	0.30192	-8.39718	17	19	10	3UTR
rno-miR-486	NM_001127580	Oxct1	TCCTGTACTGAGCTGCCCCGAG#TCGGAGTAGTCAGTTAGCAGGC#.((((((((((.((((.((((.#)))).)))))))))..))))).	2637	2659	1	-23.5	1	0.00612947	0.529	0.0389974	0.14146	-7.14013	18	22	9	3UTR
rno-miR-194-3p	NM_012592	Ivd	CCAGTGGGGCTGCTGTTATCT#AGAGACGTGGCAGCCCTCTGA#.(((.((((((((((((.(((#))))))..)))))))))))).	1326	1347	0.969231	-22.1	0	0.00196438	0.441	-0.191512	0.093562	-7.91236	18	21	12	3UTR
rno-miR-345-3p	NM_012592	Ivd	CCCTGAACTAGGGGTCTGGAGA#TCGTGGGCAAGCCTCTGGCAGGGG#(((((..((((((((.((....#.)).))))))))))))).	1642	1666	0.974359	-21.4	0	1.88374e-05	0.456	-0.171387	-0.128411	-7.61527	15	18	13	3UTR
rno-miR-327	NM_012592	Ivd	CCTTGAGGGGCATGAGGGT#GCCCTCTGCTCTTCGTGA#.(.(((((((((.((((((#))))))))))))))).).	1391	1409	1	-23.3	0	0.0251594	0.397	-0.00274811	-0.207835	-6.63999	16	18	15	3UTR
rno-miR-327	NM_012592	Ivd	CCTTGAGGGGCATGAGGGT#CCTCACCCTCTGGGG#(((.(((((...(((((..#)))))))))).))).	1599	1614	1	-20.1	0	1.21861e-05	0.544	-0.446649	0.0152034	-14.3837	13	15	10	3UTR
rno-miR-328a-3p	NM_012592	Ivd	CTGGCCCTCTCTGCCCTTCCGT#GGACTTTGGCTTTTCTGGGGTTTGCAGGGAGGGTAACAGT#((((((((((((((..(((((.#.)))))...)))))))))))..))).	1523	1563	1	-25.9	1	4.23491e-07	0.5	0.282849	-0.138203	-4.90607	19	26	11	3UTR
rno-miR-346	NM_012592	Ivd	TGTCTGCCTGAGTGCCTGCCTCT#GGGCAAGCCTCTGGCAGGGGA#(.((((((.(((.((.(((((..#))))).))))).)))))).).	1646	1667	1	-25.6	1	1.6415e-05	0.471	0.403435	-0.0576918	-7.67982	17	21	6	3UTR
rno-miR-10a-5p	NM_012592	Ivd	TACCCTGTAGATCCGAATTTGTG#GCTTTTCTGGGGTTTGCAGGGA#..((((((((((((.(.......#.).)))))))))))).	1531	1553	1	-21.3	1	1.97836e-05	0.485	0.356288	-0.0979477	-5.69245	13	16	12	3UTR
rno-miR-30c-1-3p	NM_012592	Ivd	CTGGGAGAGGGTTGTTTACTCC#GTGGGCAAGCCTCTGGCAGG#(((..(((((.((((((((...#)))))))).)))))..))).	1644	1664	1	-22.1	0	3.73878e-06	0.471	-0.0408281	-0.0963157	-13.9134	16	20	8	3UTR
rno-miR-125a-5p	NM_012592	Ivd	TCCCTGAGACCCTTTAACCTGTGA#AGGACTTTGGCTTTTCTGGGGTTTGCAGGGAG#(((((((((((((...........#.))))))).)))))).	1522	1554	1	-20.8	1	6.23965e-06	0.5	-0.108439	-0.176827	-5.76291	13	16	7	3UTR
rno-miR-128-1-5p	NM_012592	Ivd	CGGGGCCGTAGCACTGTCTGA#CAGGGAGGGTAACAGTGTCTGCGCCCTT#.((((.(((((((((((....#.)))))).))))))))).	1547	1575	1	-22.8	0	0.00777134	0.5	0.0443976	-0.177371	-5.69428	15	18	9	3UTR
rno-miR-139-3p	NM_012592	Ivd	TGGAGACGCGGCCCTGTTGGAG#CTCTGGCAGGGGAGCTCTTTC#.(((((.((..(((((((((((#)))))))))))..))))))).	1654	1675	1	-24.3	0	6.17e-05	0.471	0.305845	-0.0821717	-9.40429	18	21	11	3UTR
rno-miR-150-3p	NM_012592	Ivd	CTGGTACAGGCCTGGGGGA#TTCTCCAGCCGTGCCAGC#(((((((.((.((((((((#))))))))))))))))).	1416	1434	1	-24.4	1	0.0530801	0.5	-0.318266	-0.152891	-9.07598	17	18	17	3UTR
rno-miR-298-5p	NM_012592	Ivd	GGCAGAGGAGGGCTGTTCTTCCC#AACTGCCCTCCTCTTGCCA#(((((((((((((.(((......#))).)))))))))).))).	1372	1391	1	-29.3	1	0.0433571	0.441	-0.17061	-0.272435	-4.79441	16	19	10	3UTR
rno-miR-448-5p	NM_012592	Ivd	AACATCCTGCATAGTGCTGCCA#GGTAGCATATGACAGGT#.....(((((((.((((((((.#))))))))))).)))).	1612	1629	1	-21.6	0	0.00111914	0.485	0.236609	-0.0484442	-14.9547	15	17	11	3UTR
rno-miR-370-5p	NM_012592	Ivd	CAGGTCACGTCTCTGCAGTTACAC#GCTCCCAGCAGCAGGAGACCTTTGGAAGCAGAGACGTGGCA#...(((((((((((((........#.))))))))))))).	1297	1338	1	-26.2	0	0.000150896	0.412	0.233971	0.584155	-6.51454	13	15	13	3UTR
rno-miR-664-1-5p	NM_012592	Ivd	CTGGCTGGGGAAAAAGATTGG#CCAGCCCTCTGCTCTTCGTGAAGTCGGATTCTCCAGCCGT#.(((((((((((...((((..#.))))...))))))))))).	1388	1428	1	-22	1	0.00206425	0.471	-0.105613	-0.208379	-6.67474	15	20	11	3UTR
rno-miR-664-2-5p	NM_012592	Ivd	CTGGCTGGGGAAAATGATTGG#CCAGCCCTCTGCTCTTCGTGAAGTCGGATTCTCCAGCCGT#.(((((((((((..(((((..#.)))))..))))))))))).	1388	1428	1	-22.8	1	0.00206425	0.471	-0.105613	-0.208379	-5.9393	16	20	11	3UTR
rno-miR-196c-5p	NM_012592	Ivd	TAGGTAGTTTCGTGTTGTTGGG#CCCAGCAGCAGGAGACC#......(((((.((((((((((#)))))))))).))))).	1300	1317	1	-23.9	0	0.000196118	0.368	0.455949	0.529327	-18.9134	15	17	10	3UTR
rno-miR-532-3p	NM_012592	Ivd	CCTCCCACACCCAAGGCTTGCA#GCAAGCCTCTGGCAGGGGAGC#.(((((.(..(((((((((((.#)))))))).)))..)))))).	1648	1669	1	-27.6	0	8.26541e-06	0.471	0.0589042	-0.116443	-7.63591	17	21	8	3UTR
rno-miR-652-5p	NM_012592	Ivd	ACAACCCTAGGAGGGGGTGCCAT#ATGGCTGCTAAAAGGACTTTGGCTTTTCTGGGGTTT#..(((((((((((((((((((((#))))).))).............))))))))))))).	1510	1546	1	-22.8	1	0.000574735	0.5	0.106672	-0.244283	-4.957	21	36	13	3UTR
rno-miR-665	NM_012592	Ivd	ACCAGGAGGCTGAGGTCCCTTA#GGACTTTGGCTTTTCTGGG#.(((((((((((((((((....#))))))))))))).)))).	1523	1542	1	-24.6	1	0.000678364	0.485	-0.0535211	-0.157243	-3.79332	17	19	13	3UTR
rno-miR-935	NM_012592	Ivd	CCAGTTACCGCTTCCGCTACCGC#GGGGTTTGCAGGGAGGGTAACA#...((((((.(((((((.(((.(#).)))..)).))))))))))).	1539	1561	1	-22.5	0	6.50458e-07	0.485	-0.225786	-0.153979	-7.75705	17	22	11	3UTR
rno-miR-667-5p	NM_012592	Ivd	CGGTGCTGGTGGAGCAGTGAGCAC#TGCTCAACTGCCCTCCTCTTGCCAGCCCT#.((.(((((((((((((((((((.#)))))).))))..)))....)))))))).	1367	1396	1	-29.9	0	0.0397424	0.412	0.0173379	-0.205559	-6.82535	21	29	8	3UTR
rno-miR-764-3p	NM_012592	Ivd	GAGGAGGCCATAGTGGCAACTGT#TGCTGCTCAACTGCCCTCCTCT#(((((((.((.(((((((.....#)))))))....)).))))))).	1364	1386	1	-21.3	1	0.102385	0.412	0.00346857	-0.0171668	-9.07598	16	22	7	3UTR
rno-miR-666-5p	NM_012592	Ivd	AGCGGGCACGGCTGTGAGAG#TTCTCCAGCCGTGCCAGCC#.((.((((((((((.(((((#))))))))))))))).)).	1416	1435	1	-30.6	0	0.0538349	0.485	-0.342202	-0.217627	-7.5608	17	19	15	3UTR
rno-miR-3550	NM_012592	Ivd	CCGAGCCCATCCCTGCCCTAG#CTGGGGTTTGCAGGGAGGGTA#....((((.((((((((((((#)))))....))))))))))).	1537	1558	1	-25.3	0	8.03161e-07	0.5	0.15229	-0.151259	-10.603	16	21	11	3UTR
rno-miR-702-5p	NM_012592	Ivd	GTGAGTGGGGTGGTTGGCATG#TGCTCAACTGCCCTCCTCT#..(((.(((((((((((((..#))).)))))))))).))).	1367	1386	1	-23.7	0	0.102385	0.412	0.0127945	-0.0809839	-6.85796	16	19	10	3UTR
rno-miR-1306-5p	NM_012592	Ivd	CCACCTCCCCTGCAAACGTCCA#TGGCTGCTAAAAGGACTTTGGCTTTTCTGGGGTTTGCAGGGAGGGTA#..((((.((((((((((.((((#.)))))))))))))).)))).	1511	1558	1	-27.7	0	8.03161e-07	0.5	0.0277152	-0.209467	-6.50069	18	21	14	3UTR
rno-miR-3099	NM_012592	Ivd	TAGGCTAGAAAGAGGTTGGGGA#TCTCCAGCCGTGCCAGCCA#..((((.(.....(((((((((#)))))))))...).)))).	1417	1436	1	-20.6	0	0.0571901	0.485	-0.201004	-0.115355	-16.2603	14	19	9	3UTR
rno-miR-6316	NM_012592	Ivd	CATGTCTGTCTCTGTGGCACACA#TGGAAGCAGAGACGTGGCAG#..(((((((((((((..(.((..#)))..))))))))).)))).	1319	1339	1	-20	1	0.000121052	0.412	-0.135752	0.0742455	-5.19005	16	20	9	3UTR
rno-miR-1843b-5p	NM_012592	Ivd	ATGGAGGTCTCTGTCTGACTTAG#AGCAGCAGGAGACCTTTG#..((((((((((..(((.((...#)))))..)))))))))).	1303	1321	1	-18.9	1	0.00408725	0.382	0.396498	0.302919	-7.10297	15	18	10	3UTR
rno-miR-1956-3p	NM_012592	Ivd	TGGCTGGCACCTGGACGT#CGTGAAGTCGGATTCTCCAGCCGTGCCAGCCAG#(((((((((((((((...#.)))))..)))))))))).	1404	1437	1	-27.5	1	0.0568717	0.471	-0.317626	-0.156155	-4.17062	15	19	10	3UTR
rno-miR-337-3p	XM_006231625	Gpam	TTCAGCTCCTATATGATGCCTTT#CGTGAGGAGCTGAT#.(((((((((.((((........#))))))))))))).	3329	3343	1	-18.5	1	5.51698e-05	0.441	0	0	-6.85115	13	14	13	3UTR
rno-miR-760-3p	XM_006231625	Gpam	CGGCTCTGGGTCTGTGGGGA#CTCCAGTCTGACCCAGAGTGGC#(.((((((((((..(((((.#)))))....)))))))))).).	3357	3379	1	-27.9	1	2.45593e-05	0.46	0	0	-7.24722	16	22	10	3UTR
rno-miR-6326	XM_006231625	Gpam	CTGGTCTGTAAAGGGACACAGCA#GCTGATGAGTCCTTTGCAGACTCCAGT#(((((((((((((((.((((((.#)))).))..)))))))))))..)))).	3337	3364	1	-26.3	1	8.91583e-06	0.446	0	0	-4.17062	21	27	11	3UTR
rno-miR-1247-3p	XM_006231625	Gpam	CGGGAACGTCGAGACTGGAGC#CTCCAGTCTGACCCAGAGTGGCAAGTTTCCT#.(((((((((.(((((((((.#))))))))))))............)))))).	3357	3388	1	-23.4	1	4.29294e-05	0.463	0	0	-6.6181	18	31	12	3UTR
rno-miR-23a-3p	NM_024392	Hsd17b4	ATCACATTGCCAGGGATTTCC#GATCCACGGTAATGTGC#..(((((((((..(((((...#)))))..))))))))).	2335	2352	1	-18.7	1	0.0027717	0.588	-0.124936	0.267764	-9.59293	14	17	9	3UTR
rno-miR-23b-3p	NM_024392	Hsd17b4	ATCACATTGCCAGGGATTACC#GATCCACGGTAATGTGC#..(((((((((..(((((...#)))))..))))))))).	2335	2352	1	-19.3	1	0.0027717	0.588	-0.124936	0.267764	-9.59293	14	17	9	3UTR
rno-miR-32-5p	NM_024392	Hsd17b4	TATTGCACATTACTAAGTTGCA#CGATCCACGGTAATGTGCAGC#..((((((((((((........#.)))))))))))).	2334	2355	1	-16.4	1	0.000793748	0.588	0.0274933	0.236955	-5.9255	12	14	12	3UTR
rno-miR-99b-3p	NM_024392	Hsd17b4	CAAGCTCGTGTCTGTGGGTCCG#GGACCCACTGCGTGCTTT#.((((.((((...((((((((.#)))))))))))).)))).	2258	2276	1	-23.9	0	0.0222933	0.574	-0.24378	0.863596	-13.155	16	18	12	3UTR
rno-miR-122-5p	NM_024392	Hsd17b4	TGGAGTGTGACAATGGTGTTTG#GTCATGCTCCAG#(((((((((((...........#))))))))))).	2310	2322	1	-18.1	1	0.00758706	0.529	-0.379063	0.0666341	-10.3988	11	12	11	3UTR
rno-miR-124-3p	NM_024392	Hsd17b4	TAAGGCACGCGGTGAATGCC#GGACCCACTGCGTGCTTTAA#((((((((((((((......#.)))))))))))))).	2258	2278	1	-23.9	1	0.0445705	0.559	-0.213885	0.824649	-4.90607	14	16	14	3UTR
rno-miR-497-5p	NM_024392	Hsd17b4	CAGCAGCACACTGTGGTTTGTA#ACGATCCACGGTAATGTGCAGCA#..((.(((((((((((.((((.#)))).)))))))...)))).)).	2333	2356	1	-21.5	0	0.000658879	0.603	-0.0278685	0.302061	-9.07604	17	23	7	3UTR
rno-miR-672-5p	NM_024392	Hsd17b4	TGAGGTTGGTGTACTGTGTGTGA#TCATTACGTTCTGTCTACGCAGTCATGCTCCAGCCTTC#.((((((((.((((((((((.((#.))))))))))...)).)))))))).	2289	2327	1	-23.4	1	0.0278538	0.529	0.378658	0.267182	-5.03583	20	26	10	3UTR
rno-miR-3558-3p	NM_024392	Hsd17b4	ACTGTGGAGGGTTTCTATGT#GAAACGATCCACGGTA#((((((((..(((((.....#)))))..)))))))).	2330	2346	1	-18.9	1	0.0197062	0.559	0.0294309	0.243349	-6.46952	13	16	8	3UTR
rno-miR-3473	NM_024392	Hsd17b4	TCTAGGGCTGGAGAGATGGCTA#AGTCATGCTCCAGCCTTC#...((((((((((..((((((.#)))))).)))))))))).	2309	2327	1	-24.9	0	0.0278538	0.529	-0.49025	0.183475	-8.10683	16	18	10	3UTR
rno-miR-192-3p	XM_006230695	Cpt1a	CTGCCAGTTCCATAGGTCACAG#TGTGAGCGAATGTAGCTGGCC#..(((((((.(((.(.(((((.#))))).)..))).))))))).	4521	4542	0.974359	-21.3	1	0.0014454	0.647	0	0	-7.2894	16	21	7	3UTR
rno-miR-188-3p	XM_006230695	Cpt1a	CTCCCACATGCAGGGTTTGC#GCCATCCCTCAGTGGGAGT#(((((((.((.((((...((#))...))))))))))))).	3760	3779	0.974359	-21.6	1	8.6642e-06	0.5	0	0	-9.30903	15	19	13	3UTR
rno-miR-410-5p	XM_006230695	Cpt1a	AGGTTGTCTGTGATGAGTTCG#TGAGACCCTGGTCACCAAGTCAGACATACTGACACAGGCAGCCA#.(((((((((((.(.(((...#.))).)))))))))))).	3537	3581	0.974359	-21.8	1	6.97037e-05	0.471	0	0	-5.81791	15	18	12	3UTR
rno-miR-125a-5p	XM_006230695	Cpt1a	TCCCTGAGACCCTTTAACCTGTGA#CACAGAGGGAGGGGCTTGGT#...(((((.((((((...(((((.#)))))...))))))))))).	3443	3463	0.991453	-20	0	0.000212998	0.485	0	0	-7.80398	16	20	11	3UTR
rno-miR-761	XM_006230695	Cpt1a	GCAGCAGGGTGAAACTGACACA#GTGTGAGCATCACCTTGTGGA#.(.(((((((((..((.((((.#)))).))..))))))))).).	2993	3014	0.991453	-22.4	0	0.000889839	0.471	0	0	-7.49683	16	21	9	3UTR
rno-miR-325-5p	XM_006230695	Cpt1a	CCTAGTAGGTGCTCAGTAAGTGT#CTTACTGGTTCCTGCA#....(((((.((.(((((((...#))))))))).))))).	3304	3320	1	-18.9	0	0.00109057	0.515	0	0	-12.0782	14	16	9	3UTR
rno-miR-326-3p	XM_006230695	Cpt1a	CCTCTGGGCCCTTCCTCCAGT#CTGTGCCAGAAGTGGCCCAGAA#..((((((((((((..((((.#))).)...)))).)))))))).	3967	3989	1	-22.9	1	0.000118337	0.412	0	0	-5.9255	16	22	8	3UTR
rno-miR-328a-5p	XM_006230695	Cpt1a	GGGGGGCAGGAGGGGCTCA#GTGCCCCTTTGGCCTTGTTTGATTCCTGCCCCTG#.(((((((((((((((.(.#).)))))................)))))))))).	3936	3970	1	-30.7	1	0.0567545	0.412	0	0	-3.79332	16	34	10	3UTR
rno-miR-328a-3p	XM_006230695	Cpt1a	CTGGCCCTCTCTGCCCTTCCGT#GGGGTGGGGTGACCAGCAGTGCAGAGAGGTGCTGGC#(((((((((((((((((.((.(#).)).)))............))))))))).))))).	3993	4029	1	-26.8	1	7.60076e-05	0.456	0	0	-3.93757	20	36	9	3UTR
rno-miR-330-3p	XM_006230695	Cpt1a	GCAAAGCACAGGGCCTGCAGAGA#TCTCTCAGGTTTCCAGTGTCCTTGCT#((((.((((.(((((((.(((((#))))))))))..)).))))..)))).	4275	4301	1	-22.8	0	0.000720033	0.5	0	0	-9.29912	20	26	10	3UTR
rno-miR-331-3p	XM_006230695	Cpt1a	GCCCCTGGGCCTATCCTAGAA#TCTGTAACACACTAATGGAATGGTTAGGCCTGGGGA#..(((((((((((.((.....#.)).))))))))))).	3064	3100	1	-25	1	0.000121075	0.544	0	0	-5.81384	13	16	11	3UTR
rno-miR-342-5p	XM_006230695	Cpt1a	AGGGGTGCTATCTGTGATTGAG#TTCTGGCAGATACACCCCTG#(((((((.(((((((.(.....#.).)))))))))))))).	3624	3644	1	-23.3	1	0.00100334	0.529	0	0	-6.48426	15	18	14	3UTR
rno-miR-345-5p	XM_006230695	Cpt1a	TGCTGACCCCTAGTCCAGTGC#CTGGATTCTGGGGGTTG#....((((((((((((((...#)))))..))))))))).	2896	2913	1	-22	0	0.00122675	0.544	0	0	-9.54656	14	17	9	3UTR
rno-miR-129-5p	XM_006230695	Cpt1a	CTTTTTGCGGTCTGGGCTTGC#GCAAGCGGGACCATAGAGAAGA#((((((..(((((..((((((#)))))).)))))...)))))).	3233	3255	1	-21	0	0.0253986	0.485	0	0	-9.38719	17	22	6	3UTR
rno-miR-129-2-3p	XM_006230695	Cpt1a	AAGCCCTTACCCCAAAAAGCAT#GGGAGGGGCTTG#((((((((.(((..........#))))))))))).	3449	3461	1	-17.8	1	0.000471307	0.5	0	0	-8.10843	11	12	11	3UTR
rno-let-7i-3p	XM_006230695	Cpt1a	CTGCGCAAGCTACTGCCTTGCT#CAAGGCAGAAGAGTGGGCT#..((.((..((.((((((((..#)))))))).))..)).)).	4339	4358	1	-21.9	0	0.000791002	0.544	0	0	-15.7929	14	19	8	3UTR
rno-let-7i-3p	XM_006230695	Cpt1a	CTGCGCAAGCTACTGCCTTGCT#AGCGGGAGAGTGTGGCTTGCTGTAT#.((((((((((((..(((((((#)))))).)...))))))))).))).	3489	3514	1	-21.7	1	4.32171e-05	0.471	0	0	-5.38561	19	25	9	3UTR
rno-miR-21-3p	XM_006230695	Cpt1a	CAACAGCAGTCGATGGGCTGTC#GCGGCCTGACTCTCGCTGCTGTG#..(((((((.(((((((((((.#))))))))....)))))))))).	4193	4216	1	-24.4	1	1.17574e-05	0.471	0	0	-6.19951	18	23	10	3UTR
rno-miR-23a-5p	XM_006230695	Cpt1a	GGGGTTCCTGGGGATGGGATTT#GTCCCTTTGGAAGTTCACATTTCCAGGAAGCAGAGTACCACCTCCCCA#((((((((((((((((((((((#.)))))).))))))))))))..............)))).	3129	3177	1	-27.4	1	0.0115239	0.5	0	0	-3.93757	22	39	12	3UTR
rno-miR-23a-3p	XM_006230695	Cpt1a	ATCACATTGCCAGGGATTTCC#GGTGACCCTGTGAATACTTGGGCGTCTGACTCCACCCAGGCAGTGTGAG#.((((((((((.(((......#.))).)))))))))).	2951	3000	1	-22.6	1	4.09119e-05	0.5	0	0	-7.37318	13	16	10	3UTR
rno-miR-23b-3p	XM_006230695	Cpt1a	ATCACATTGCCAGGGATTACC#GTGAATACTTGGGCGTCTGACTCCACCCAGGCAGTGTGAG#.((((((((((.(((......#.))).)))))))))).	2960	3000	1	-22.6	1	4.09119e-05	0.5	0	0	-7.37318	13	16	10	3UTR
rno-miR-24-3p	XM_006230695	Cpt1a	TGGCTCAGTTCAGCAGGAACAG#TGTCCTTGCTGCTCCTGAGCA#..((((((..(((((((.(((.#))).)))))))...)))))).	4291	4312	1	-22.6	1	4.82526e-06	0.515	0	0	-7.2559	16	21	7	3UTR
rno-miR-27b-3p	XM_006230695	Cpt1a	TTCACAGTGGCTAAGTTCTGC#GACTTAGCATCTGTGAAG#(((((((..((((((((....#))))))))..))))))).	3253	3271	1	-20	1	0.00148134	0.485	0	0	-7.3076	15	18	8	3UTR
rno-miR-27a-5p	XM_006230695	Cpt1a	AGGGCTTAGCTGCTTGTGAGCA#CACAGGCAGCCAAAGCCTC#.((((((.((((((((((....#))))))))))..)))))).	3569	3588	1	-26.1	1	0.000384372	0.5	0	0	-6.10696	16	19	10	3UTR
rno-miR-30c-5p	XM_006230695	Cpt1a	TGTAAACATCCTACACTCTCAGC#GCCCAGAAGTGAGGGGTGGGGTGACCAGCAG#(((...((((((((.((((((..#.))))))))))))))....))).	3981	4012	1	-21	0	0.000113181	0.412	0	0	-13.725	17	23	14	3UTR
rno-miR-30c-1-3p	XM_006230695	Cpt1a	CTGGGAGAGGGTTGTTTACTCC#GAGTAGCCCGGCTAGTGCCCGAGTGGGACATTCCTCTCTCAGG#(((((((((((.(((((((((.#.)))))).))).))))))))))).	4241	4284	1	-28.7	1	9.28649e-05	0.397	0	0	-7.28438	20	24	11	3UTR
rno-miR-103-3p	XM_006230695	Cpt1a	AGCAGCATTGTACAGGGCTATGA#TAGCATCTGTGAAGCCTTTGGGTGGATATGTGAGGATGCTGCTT#(((((((((.(((((((((....#.)))))...........))))..))))))))).	3257	3301	1	-21.2	1	0.000764004	0.515	0	0	-5.18008	18	33	9	3UTR
rno-miR-106b-3p	XM_006230695	Cpt1a	CCGCACTGTGGGTACTTGCTGC#CGGCTAGTGCCCGAGTGGGA#((.((((.((((((((.((((.#)))).)))))))))))))).	4249	4269	1	-25.6	0	5.96428e-06	0.456	0	0	-7.80875	18	20	14	3UTR
rno-miR-107-3p	XM_006230695	Cpt1a	AGCAGCATTGTACAGGGCTATCA#TGAAGCCTTTGGGTGGATATGTGAGGATGCTGCTT#(((((((((.((((...(((((.#.)))))...))))..))))))))).	3266	3301	1	-22.3	1	0.000764004	0.515	0	0	-6.14858	18	25	9	3UTR
rno-miR-125b-2-3p	XM_006230695	Cpt1a	ACAAGTCAGGCTCTTGGGACCT#GGTCACCAAGTCAGACATACTGACACAGGCAGCCAAAGCCTCACGGAGCCAGGAGATATAGATAGATACTGGCTTGTA#(((((((((.(((((((..((.#.))..))))))).............))))))))).	3546	3624	1	-23.2	1	0.00126861	0.515	0	0	-5.18008	18	35	9	3UTR
rno-miR-125b-2-3p	XM_006230695	Cpt1a	ACAAGTCAGGCTCTTGGGACCT#GTCAGAGCGGCCTGACTC#...((((((((((((..(((..#))).))).))))))))).	4187	4205	1	-20.4	0	1.18592e-06	0.471	0	0	-6.74759	15	18	9	3UTR
rno-miR-129-1-3p	XM_006230695	Cpt1a	AAGCCCTTACCCCAAAAAG#GGGAGGGGCTTG#((((((((.(((.......#))))))))))).	3449	3461	1	-17.8	1	0.000471307	0.5	0	0	-8.10843	11	12	11	3UTR
rno-miR-129-1-3p	XM_006230695	Cpt1a	AAGCCCTTACCCCAAAAAG#GGGGTGGGGTG#..((((.((((((......#)))))))))).	3993	4004	1	-18.1	0	0.0123799	0.368	0	0	-8.32603	10	11	10	3UTR
rno-miR-134-5p	XM_006230695	Cpt1a	TGTGACTGGTTGACCAGAGGGG#CCCTGGTCACCAAGTCAGAC#(.(((((((.(((((((.((..#)))))))))))).)))).).	3542	3562	1	-23.7	1	0.000238201	0.441	0	0	-6.34376	17	20	12	3UTR
rno-miR-135a-3p	XM_006230695	Cpt1a	TGTAGGGATGGAAGCCATGAAA#TCAGGTTTCCAGTGTCCTTGCT#.(((((((((((((((.(((..#)))))))))))...))))))).	4279	4301	1	-23	1	0.000720033	0.5	0	0	-3.79332	18	22	11	3UTR
rno-miR-183-5p	XM_006230695	Cpt1a	TATGGCACTGGTAGAATTCACT#CTGCCAGTTCCATT#.((((.((((((((........#)))))))).)))).	3403	3417	1	-17.6	0	0.00387139	0.485	0	0	-6.66278	12	14	8	3UTR
rno-miR-186-3p	XM_006230695	Cpt1a	GCCCAAAGGTGAATTTTTTGG#CCATAGAGAAGACTTAGCATCTGTGAAGCCTTTGGGTG#((((((((((........((.#.))........)))))))))).	3243	3281	1	-17.7	1	0.000349104	0.529	0	0	-13.2236	12	22	10	3UTR
rno-miR-194-3p	XM_006230695	Cpt1a	CCAGTGGGGCTGCTGTTATCT#AGGTGACAGACTTCCTCAGTGGT#(((.(((((..((((((((((#))))))))).)..))))).))).	2931	2954	1	-24.1	0	0.000128852	0.485	0	0	-11.0369	18	23	9	3UTR
rno-miR-199a-3p	XM_006230695	Cpt1a	ACAGTAGTCTGCACATTGGTTA#ACCAAGTCAGACATACTGA#.((((((((((.((.(((((..#)))))))))))).))))).	3550	3569	1	-19	1	0.000154737	0.426	0	0	-7.87558	17	19	12	3UTR
rno-miR-216a-5p	XM_006230695	Cpt1a	TAATCTCAGCTGGCAACTGTGA#TCACGGAGCCAGGAGATA#..(((((..(((((..((((((#)))))).)))))))))).	3586	3604	1	-19.7	0	0.0342529	0.485	0	0	-9.29552	16	18	10	3UTR
rno-miR-216a-5p	XM_006230695	Cpt1a	TAATCTCAGCTGGCAACTGTGA#CAGAGAGGTGCTGGCTGAA#.....((((((((((.((.((.#)).))...)))))))))).	4014	4033	1	-18.8	0	0.000258114	0.471	0	0	-13.8986	14	19	10	3UTR
rno-miR-218a-1-3p	XM_006230695	Cpt1a	AAACATGGTTCCGTCAAGCAC#GCAAGCGGGACCATA#....((((((((((...((..#))..)))))))))).	3233	3248	1	-17.7	0	0.000618041	0.485	0	0	-10.5151	12	15	10	3UTR
rno-miR-221-3p	XM_006230695	Cpt1a	AGCTACATTGTCTGCTGGGTTTC#AGAGCCAGCAGAGGCAACAGCTGTAGCTA#((((((((((((((((((.(((.#))).)))))))).....))).))))))).	3030	3059	1	-25.5	1	0.000414464	0.544	0	0	-3.93757	21	29	8	3UTR
rno-miR-221-3p	XM_006230695	Cpt1a	AGCTACATTGTCTGCTGGGTTTC#GGACAACAGCGGGAGAGTGTGGCTT#(((((((((.(((((((.((((.#))))..)))))).).))))))))).	3482	3507	1	-23.3	1	0.00463213	0.471	0	0	-5.18008	20	25	9	3UTR
rno-miR-222-3p	XM_006230695	Cpt1a	AGCTACATCTGGCTACTGGGT#GCCCCTGTGCCAGAAGTGGCC#.(((((.((((((.((.((((#))))..)))))))).))))).	3963	3984	1	-25.3	0	2.8425e-06	0.397	0	0	-6.19385	17	21	8	3UTR
rno-miR-365-5p	XM_006230695	Cpt1a	GAGGGACTTTCAGGGGC#CCCCTGAGCCACACGGAAGGAAAACGGACCCTCG#(((((.((((((((((.#)))))))).................)).))))).	2615	2649	1	-21	0	0.00155405	0.529	0	0	-5.83853	15	34	8	3UTR
rno-miR-383-3p	XM_006230695	Cpt1a	CCACAGCACTGCCTGGTCAGA#TGACCCTGTGAATACTTGGGCGTCTGACTCCACCCAGGCAGTGTGAGCATCACCTTGTGGA#(((((((((((((((((((((#.)))))......)))))))))))...........))))).	2953	3014	1	-29.7	1	0.000889839	0.471	0	0	-3.93757	21	40	11	3UTR
rno-miR-370-5p	XM_006230695	Cpt1a	CAGGTCACGTCTCTGCAGTTACAC#GTGAAGGCAGGGATGCTGGAGTCTCATTGCCTGC#((((((((((((((((..((((..#))))..))))))))).))..........))))).	3373	3407	1	-23.5	1	0.000544807	0.485	0	0	-3.93757	20	34	9	3UTR
rno-miR-543-3p	XM_006230695	Cpt1a	AAACATTCGCGGTGCACTTCT#AGAAGTGCATGTGTGAGCGAATGTA#..((((((((.((((((((((#))))))))))......)))))))).	4510	4535	1	-23.3	1	0.000670901	0.662	0	0	-7.78178	18	25	10	3UTR
rno-miR-487b-5p	XM_006230695	Cpt1a	AGTGGTTATCCCTGTCCTCTTCG#GAAGTGGCCCAGAAGTGAGGGGTGGGGTGACCAG#..((((((((((...((((((..#.)))))).)))))))))).	3975	4009	1	-23.6	1	4.45611e-05	0.397	0	0	-7.83842	16	19	10	3UTR
rno-miR-487b-3p	XM_006230695	Cpt1a	AATCGTACAGGGTCATCCACTT#AGGTGACAGACTTCCTCAGTGGTGACCCTGTGA#.....((((((((((.(((((.#.))))))))))))))).	2931	2964	1	-25.1	0	0.000868341	0.441	0	0	-13.8986	15	17	15	3UTR
rno-miR-20b-3p	XM_006230695	Cpt1a	ACTGCAGTGTGAGCACTTCTGG#CCAGAAGTGGCCCAGAAGTGAGGGGTGGGGTGACCAGCAGTGCAGA#.(((((.(((...(((((((((#.)))))))))................))).))))).	3972	4018	1	-24.4	0	0.00798123	0.412	0	0	-12.7977	17	36	9	3UTR
rno-miR-503-5p	XM_006230695	Cpt1a	TAGCAGCGGGAACAGTACTGCAG#GCAGAAACAAACTGTTGTAAGTCAGAGCGGCCTGACTCTCGCTGCTGT#(((((((((((.(((..((((..#.)))).)))..))))))))))).	4167	4215	1	-25.8	1	1.46234e-05	0.471	0	0	-7.51743	18	23	11	3UTR
rno-miR-378a-3p	XM_006230695	Cpt1a	ACTGGACTTGGAGTCAGAAGG#CCTCAGTGGTGACCCTGTGAATACTTGGGCGTCTGACTCCACCCAGG#.((((...((((((((((...#.)))))))))).)))).	2944	2991	1	-23.4	0	2.2642e-05	0.456	0	0	-9.55161	14	17	10	3UTR
rno-miR-505-5p	XM_006230695	Cpt1a	GGGAGCCAGGAAGTATTGATGTT#ACATCCAGAGATGCCTTGGCTCCA#.(((((((((..((((((((((.#)))))....)))))))))))))).	2795	2819	1	-23	1	0.000704531	0.5	0	0	-9.9649	19	24	14	3UTR
rno-miR-664-1-5p	XM_006230695	Cpt1a	CTGGCTGGGGAAAAAGATTGG#TAGTCTTACCGCAGCCAA#.((((((.((...(((((((.#))))))).)).)))))).	4424	4442	1	-20.6	1	0.00230502	0.647	0	0	-13.5677	15	18	7	3UTR
rno-miR-883-5p	XM_006230695	Cpt1a	TGCTGAGAGAAGTAGCAGTTACT#GGTGACAGACTTCCTCAGTG#.((((((.(((((....((((((#))))))..))))))))))).	2932	2952	1	-19.7	1	8.23594e-05	0.5	0	0	-7.9323	17	20	11	3UTR
rno-miR-883-5p	XM_006230695	Cpt1a	TGCTGAGAGAAGTAGCAGTTACT#TTGCTGCTCCTGAGCAG#((((.((.(.((((((((.....#))))))))))).)))).	4296	4313	1	-18.6	0	4.38254e-06	0.529	0	0	-11.6128	15	17	11	3UTR
rno-miR-17-2-3p	XM_006230695	Cpt1a	ACTGCACTGCAAGCACTTCTTAC#GGGGTGACCAGCAGTGCAGA#.(((((((((..(((((((....#)))))).)..))))))))).	3998	4018	1	-24.6	1	0.00798123	0.412	0	0	-9.9649	16	20	9	3UTR
rno-miR-384-5p	XM_006230695	Cpt1a	TGTAAACAATTCCTAGGCAATGT#GCCTGGGGATTAAGGTTCTGCT#.(((((((((((((((((.....#)))))))))))...))).))).	3091	3113	1	-18.8	1	0.000420616	0.515	0	0	-3.79332	17	22	11	3UTR
rno-miR-423-5p	XM_006230695	Cpt1a	TGAGGGGCAGAGAGCGAGACTTTT#AGTGTCCTTGCTGCTCCTGAG#(.((((((((.(((.((.(((...#))).))))).)))))))).).	4289	4310	1	-22.4	1	3.53042e-06	0.529	0	0	-8.66147	17	21	8	3UTR
rno-miR-532-3p	XM_006230695	Cpt1a	CCTCCCACACCCAAGGCTTGCA#TGTGAAGCCTTTGGGTGGATATGTGAGGA#((((.(((((((((((((((((#))).))))))).)))))....)).)))).	3264	3293	1	-25.4	0	0.000466082	0.515	0	0	-8.05661	21	29	7	3UTR
rno-miR-674-5p	XM_006230695	Cpt1a	GCACTGAGATGGGAGTGGTGTA#TACCACCTCCCCAGTGCC#((((((....((((((((((..#)))))).)))))))))).	3164	3182	1	-23.2	0	0.0197143	0.485	0	0	-10.0938	16	18	10	3UTR
rno-miR-873-5p	XM_006230695	Cpt1a	GCAGGAACTTGTGAGTCTCCT#AGGATGCTGCTTCCCCTTACTGGTTCCTGCA#(((((((((.(((((......#.))))).))))))))).	3289	3320	1	-22.6	1	0.00109057	0.515	0	0	-5.41313	14	17	9	3UTR
rno-miR-146b-5p	XM_006230695	Cpt1a	TGAGAACTGAATTCCATAGGCTGT#ACTAATGGAATGGTTAGGCCTGGGGATTAAGGTTCTG#..((((((.((((((.((((((..#.))))))))))))..)))))).	3074	3111	1	-22	1	0.000138096	0.515	0	0	-6.24644	18	22	12	3UTR
rno-miR-362-5p	XM_006230695	Cpt1a	AATCCTTGGAACCTAGGTGTGAAT#TTAGGCCTGGGGATTAAGGT#...((((((..(((((((.(((..#))).)))))))..)))))).	3087	3107	1	-21.3	0	0.000196827	0.529	0	0	-10.5818	16	20	7	3UTR
rno-miR-615	XM_006230695	Cpt1a	GGGGGTCCCCGGTGCTCGGATC#CTGAGCCACACGGAAGGAAAACGGACCCTCG#(((((((((((((((((((...#)))))).)).))).........)))))))).	2618	2649	1	-29.1	1	0.00155405	0.529	0	0	-3.93757	19	31	8	3UTR
rno-miR-653-3p	XM_006230695	Cpt1a	TTCACTGGGGTTTGTTTCACTA#AGGAAAACGGACCCTCGTGAT#.((((.(((((((((((..((.#))..))))))))))).)))).	2632	2653	1	-22.4	0	0.00472286	0.5	0	0	-5.69428	17	21	11	3UTR
rno-miR-802-3p	XM_006230695	Cpt1a	ACGGAGAGTCTTTGTCACTCAGT#TGAGTGACAGCCACTGTCCC#..(((.(((..((((((((((..#))))))))))..))).))).	3114	3134	1	-23.1	0	5.72601e-05	0.515	0	0	-10.9252	16	20	10	3UTR
rno-miR-935	XM_006230695	Cpt1a	CCAGTTACCGCTTCCGCTACCGC#GTGCATGTGTGAGCGAATGTAGCTGGC#(((((((((((((.(((...(((#)))...))).)))))...)))))))).	4514	4541	1	-21.6	1	0.00141147	0.662	0	0	-4.79441	19	27	8	3UTR
rno-miR-465-3p	XM_006230695	Cpt1a	TGATCAGTGCCTTTCTGAGTAG#CAGAGAGGTGCTGGC#...((((((((((((((.....#)))))))))))))).	4014	4029	1	-21.4	0	7.60076e-05	0.456	0	0	-6.51454	14	15	14	3UTR
rno-miR-761	XM_006230695	Cpt1a	GCAGCAGGGTGAAACTGACACA#CAGTGTCCTTGCTGCT#(((((((((....((((.....#))))..))))))))).	4288	4304	1	-21.4	1	0.000405335	0.5	0	0	-12.6408	13	16	9	3UTR
rno-miR-764-5p	XM_006230695	Cpt1a	GGTGCTCACATGTCCTCCTCCA#GGGTGGATATGTGAGGATG#.((.(((((((((((.(((...#))).))))))))))).)).	3276	3295	1	-24.2	0	0.000452213	0.529	0	0	-7.0584	16	19	11	3UTR
rno-miR-764-3p	XM_006230695	Cpt1a	GAGGAGGCCATAGTGGCAACTGT#CAGTGCCCCTTTGGCCTTGTTT#((.(((((((.((.(((.((((.#))))))).)).))))))).)).	3934	3956	1	-25	0	0.018336	0.5	0	0	-9.17673	18	22	7	3UTR
rno-miR-3550	XM_006230695	Cpt1a	CCGAGCCCATCCCTGCCCTAG#AGGGAGGGGCTTGGT#((((((((.(((((.......#))))).)))))))).	3448	3463	1	-24.7	1	0.000212998	0.485	0	0	-5.96246	13	15	8	3UTR
rno-miR-344b-5p	XM_006230695	Cpt1a	AGTCAGGCTGCTGGTTATATTC#TGTAAGTCAGAGCGGCCTGACTC#((((((((((((..(((((...#))))).....)))))))))))).	4182	4205	1	-23.5	1	1.18592e-06	0.471	0	0	-6.08354	17	23	12	3UTR
rno-miR-3552	XM_006230695	Cpt1a	AGGCTGCAGGCCCACTTCCCT#AGAGGGAGGGGCTTGGTAGTCA#.((((((((((((.(((((((#)).)))))))))))).))))).	3446	3468	1	-26.8	1	0.000344157	0.426	0	0	-4.65016	19	22	12	3UTR
rno-miR-3557-5p	XM_006230695	Cpt1a	GCCTTCTGACTCCAAGTCCAGT#GGGCTTGGTAGTCAAAGGCT#(((((.(((((((((((((...#)))))))).)))))))))).	3454	3474	1	-28.7	0	0.000241204	0.426	0	0	-5.83853	18	20	10	3UTR
rno-miR-3557-3p	XM_006230695	Cpt1a	ACACAGGACCTGGAGTCAGGAG#CCTGACTCTCGCTGCTGTGA#.(((((.(.(.(((((((((..#))))))))).).).))))).	4197	4217	1	-24.3	0	1.31176e-05	0.471	0	0	-9.21818	16	20	9	3UTR
rno-miR-3559-3p	XM_006230695	Cpt1a	ATGTAGTACTGAGTCTGTCGTG#CTAGGTCATTTTGGCGACAGACTCAGG#........(((((((((((((.#.))))))))))))).	3702	3729	1	-24.8	0	0.00519815	0.529	0	0	-19.4239	13	15	13	3UTR
rno-miR-3562	XM_006230695	Cpt1a	TTGGGGCAGTGGCTGGATGGGA#CCTGGGGATTAAGGTTCTGCTATGAGTGACAGCCACTGTCCCT#..(((((((((((((.......#.))))))))))))).	3092	3135	1	-28.7	1	6.263e-05	0.515	0	0	-5.19005	13	15	13	3UTR
rno-miR-3569	XM_006230695	Cpt1a	GGAGGACAGCAGACTCAGGTC#GCCTTTGGGTGGATATGTGAGGATGCTGCTTCCC#(((((.(((((..((((.((.#.)).))))..)))))))))).	3270	3304	1	-24.2	0	0.00122566	0.5	0	0	-10.4745	16	21	10	3UTR
rno-miR-3573-5p	XM_006230695	Cpt1a	TGAGGGGCAGTGATAGAAAGGA#CCTTTGGCCTTGTTTGATTCCTGCCCCTG#..((((((((.((((((((((.#.)))).))))..)))))))))).	3941	3970	1	-21.9	1	0.0567545	0.412	0	0	-7.78178	18	23	10	3UTR
rno-miR-1912-3p	XM_006230695	Cpt1a	CACAGAACATGCAGTGAGA#TCTCACTGTATGTG#......(((((((((((((#))))))))))))).	4357	4371	1	-20.3	0	2.83243e-05	0.559	0	0	-15.5666	13	14	13	3UTR
rno-miR-409b	XM_006230695	Cpt1a	AGGGGTTCACCGAGCAACATTCG#GGATTTAAATGCTGGTGAATTCCTG#(((((((((((.((((.......#.))))))))))))))).	2874	2899	1	-22	1	0.000171637	0.574	0	0	-7.28438	15	17	15	3UTR
rno-miR-3596b	XM_006230695	Cpt1a	AACTATGCAACCTACTACCT#GGTAGTCAAAGGCTGCATAGC#..(((((((.(((((((((.#))))))...))).))))))).	3460	3481	1	-21.4	1	1.29265e-06	0.412	0	0	-6.19951	16	21	7	3UTR
rno-miR-3584-3p	XM_006230695	Cpt1a	GCCCGCATCTCTGGATCCC#GGCTTCACGTGTGAATTGTGACCCTACTACATCCAGAGATGCCTTGGCTCCAGGAATATTGGGCA#((((((((((((((((...#.))))))))))))..................)))).	2767	2832	1	-26.7	1	3.04654e-05	0.485	0	0	-3.93757	16	36	12	3UTR
rno-miR-702-5p	XM_006230695	Cpt1a	GTGAGTGGGGTGGTTGGCATG#CCAGTGCCACCTTCCTCACA#(((((.(((((((((((....#)))..)))))))).))))).	3174	3194	1	-23.2	0	0.0700693	0.485	0	0	-5.83853	16	20	8	3UTR
rno-miR-702-3p	XM_006230695	Cpt1a	TGCCCACCCTTTACCCCACTCCA#GGGGTGGGGTGACCAGCAGTGCAGAGAGGTGCTGGCT#.(((((((((((((((((((((.#))))))))))))............)).))))..))).	3993	4030	1	-31.4	1	0.000117009	0.456	0	0	-3.79332	21	37	12	3UTR
rno-miR-3590-5p	XM_006230695	Cpt1a	TGCCCTTTTAACATTGCACTG#CAGTGCCTTAAAGAAGGGGCC#.((((((((......((((((#))))))......)))))))).	3207	3228	1	-20.1	1	4.72525e-05	0.5	0	0	-14.0888	14	21	8	3UTR
rno-miR-3594-3p	XM_006230695	Cpt1a	CACACCGCCTCTGCCCGCTAGT#ACAGCGGGAGAGTGTGGC#....((((((((.((((((.((#)))))))))))).)))).	3487	3505	1	-23.4	0	0.000448962	0.471	0	0	-10.8357	16	18	12	3UTR
rno-miR-328b-3p	XM_006230695	Cpt1a	CTGGCCCTCTCTGCCCTA#TGGGGTGACCAGCAGTGCAGAGAGGTGCTGGC#((((((((((((((.((.#.)).))))))))).))))).	3997	4029	1	-24.8	1	7.60076e-05	0.456	0	0	-4.67302	16	20	9	3UTR
rno-miR-6216	XM_006230695	Cpt1a	GATACACAGAGGCAGGAGGAGAA#TTTTCCAGTGCCCCTTTGGCCTTGTTTGATTCCTGCCCCTGTGC#....(((((.((((((((..(((#.)))..)))))))).))))).	3929	3973	1	-24.1	0	0.0142129	0.382	0	0	-10.7891	16	21	8	3UTR
rno-miR-3102	XM_006230695	Cpt1a	CTCTACTCCCTGCCCCAGCCA#GGTCCTTGGTGAAGGCAGGGATGCTGGAGT#((((((((((((((...((((#.))))...)))))))).).))))).	3365	3395	1	-26.6	1	0.000387784	0.485	0	0	-4.90607	18	25	8	3UTR
rno-miR-3102	XM_006230695	Cpt1a	CTCTACTCCCTGCCCCAGCCA#GCTGTTGGCAAGAGGAGTGAGA#(((.((((((((((.((((..#))))..)))).).)))))))).	3520	3542	1	-22.5	0	0.0172263	0.5	0	0	-7.70505	17	22	8	3UTR
rno-miR-344g	XM_006230695	Cpt1a	AGTCAGGCTCCTGGCAGGAGTC#GACTCCACCCAGGCAGTGTGAG#..(((.((((((((..((((((#))))))..))))).))).))).	2978	3000	1	-26.7	0	4.09119e-05	0.5	0	0	-7.82646	17	22	6	3UTR
rno-miR-344g	XM_006230695	Cpt1a	AGTCAGGCTCCTGGCAGGAGTC#GATTCCTGCCCCTGTGCCAGAAGTGGCCCAGAAGTGAGGGGTGGGGTGACCAGCAGTGCAGAGAGGTGCTGGCTG#((((((((((((((((((((((#))))))))))..........................))))))..........................)))))).	3956	4031	1	-26.1	1	0.000167689	0.456	0	0	-3.93757	22	75	10	3UTR
rno-miR-6316	XM_006230695	Cpt1a	CATGTCTGTCTCTGTGGCACACA#GTGTCTTCAGAGCCAGCAGAGGCAACAG#..(((.((((((((((((((((.#)))).......)))).))))))))))).	3022	3050	1	-22.7	0	0.000132051	0.544	0	0	-6.85796	19	28	11	3UTR
rno-miR-6317	XM_006230695	Cpt1a	GTGAACCTGAGAGAAAGGCTC#AGCTTAGCTCTCCGAGGTTTACA#(((((((((((((..(((((.#)))))..)))))..)))))))).	3895	3918	1	-23.4	1	0.00806407	0.544	0	0	-5.52986	18	23	8	3UTR
rno-miR-6324	XM_006230695	Cpt1a	TCAGTAGGCCAGACAGCAAGCAC#GCTTGTATTCTGGCAGATACA#...(((.((((((..((((((..#))))))..))))))...))).	3617	3638	1	-21.7	0	0.00569688	0.559	0	0	-9.65052	15	21	6	3UTR
rno-miR-3072	XM_006230695	Cpt1a	TGCCCCCTCCAGGAAGCCTTCTT#GGTGAATTCCTGGATTCTGGGGGTT#.(((((((((((((((((.....#)))...))))))))....)))))).	2887	2912	1	-26.8	1	0.000711623	0.544	0	0	-3.79332	17	25	8	3UTR
rno-miR-7578	XM_006230695	Cpt1a	CGTGGCTCGTCTTCTGCCTCAGA#AGGCAGAAGAGTGGGCTCTCACT#.((((((((((((((((((....#)))))))))).)))))...))).	4341	4364	1	-24.8	1	0.000121977	0.544	0	0	-3.79332	18	23	10	3UTR
rno-miR-148a-5p	XM_006230695	Cpt1a	AAAGTTCTGAGACACTCTGACTC#AGTGTCTTCAGAGCC#...(((((((((((((.......#))))))).)))))).	3021	3036	1	-17.9	0	0.00671428	0.515	0	0	-6.51454	13	15	7	3UTR
rno-miR-3084b-3p	XM_006230695	Cpt1a	CTGCCAGTTCCCTTCAGACAA#GGAGGGGCTTGGTAGT#(((((((.(((((((......#))))))).))))))).	3450	3466	1	-20.9	1	0.000174986	0.441	0	0	-6.48426	14	16	7	3UTR
rno-miR-199a-3p	NM_053551	Pdk4	ACAGTAGTCTGCACATTGGTTA#GTGTGTGGACTCTTGTT#((((.(((((((((((......#))))))))))).)))).	1397	1414	0.974359	-16.9	0	8.4396e-05	0.5	-0.245165	-0.0779741	-8.05661	15	17	11	3UTR
rno-miR-100-5p	NM_053551	Pdk4	AACCCGTAGATCCGAACTTGTG#AAGTGGGTCTACGGC#...((((((((((..((((...#)))))))))))))).	1365	1380	1	-18.6	0	6.39096e-05	0.441	-0.276708	0.199316	-8.10683	14	15	14	3UTR
rno-miR-543-3p	NM_053551	Pdk4	AAACATTCGCGGTGCACTTCT#GGATCAAAGTGGGTCTACGGCAGTGCTGCTTCGTGAATGTG#..((((((((((((((((.((#.)).))))).))..))))))))).	1359	1400	1	-19.3	1	0.0015553	0.516	-0.324952	0.342875	-4.957	18	24	9	3UTR
rno-miR-541-3p	NM_053551	Pdk4	AGTGGCGAACACAGAATCCATAC#GTGTGGACTCTTGTTTCCGCA#.((((.(((((.(((.(((((((#))))))).)))))))))))).	1399	1420	1	-20.9	0	7.97331e-06	0.523	-0.292245	-0.0520803	-9.27414	19	21	12	3UTR
rno-miR-497-5p	NM_053551	Pdk4	CAGCAGCACACTGTGGTTTGTA#GCACTTTACGGGATCAAAGTGGGTCTACGGCAGTGCTGCTT#.((((((((.((((((......#.))))))..)))))))).	1349	1390	1	-20.6	1	4.53721e-05	0.485	0.0249525	0.388113	-5.03583	14	18	8	3UTR
rno-miR-665	NM_053551	Pdk4	ACCAGGAGGCTGAGGTCCCTTA#GGGGATCTCGCCTGGC#.(((((....((((((((((..#))))))))))))))).	1335	1351	1	-23.2	0	2.66234e-06	0.426	0.432779	0.350567	-9.94954	15	16	15	3UTR
rno-miR-465-5p	NM_053551	Pdk4	TATTTAGAACGGTGCTGGTGTG#TACGGCAGTGCTGCTTCGTGAATGT#(((((((((((((((((.((((#)))).)))))))).))).)))))).	1374	1399	1	-19.2	1	0.00143158	0.508	-0.128705	0.102922	-3.93757	21	25	8	3UTR
rno-miR-135b-3p	NM_057197	Decr1	ATGTAGGGCTAAAAGCCATGGG#TTCATGGCTTCCTCTGCG#..((((((....((((((((((#)))))))))).)))))).	1057	1075	1	-18.6	1	0.00174167	0.588	0.450551	0.424819	-13.4275	16	18	10	3UTR
rno-miR-135a-3p	NM_057197	Decr1	TGTAGGGATGGAAGCCATGAAA#TTCATGGCTTCCTCTGCGA#((((((...((((((((((((.#)))))))))))))))))).	1057	1076	1	-25.3	0	0.0017363	0.574	0.359911	0.421749	-8.85129	18	19	18	3UTR
rno-miR-376a-3p	NM_057197	Decr1	ATCGTAGAGGAAAATCCACGT#ACGTTCATGGCTTCCTCTGCGAC#.(((((((((((...(((...#.))).))))))))))).	1054	1077	1	-20	1	0.00152232	0.574	0.436198	0.373335	-6.67474	14	17	11	3UTR
rno-miR-485-5p	NM_057197	Decr1	AGAGGCTGGCCGTGATGAATTC#TCATGGCTTCCTCTG#(((((..((((((((.......#)))))))).))))).	1058	1073	1	-20	0	0.00384154	0.588	0.516338	0.386193	-7.61527	13	15	8	3UTR
rno-miR-6215	NM_057197	Decr1	TTTAGGGTTGCAGAGCCAGG#TGGCTTCCTCTGCGACAAACTAAAG#(((((.((((((((((((..#))))....))))))))...))))).	1061	1086	1	-19	0	0.00569592	0.588	0.261961	0.396452	-5.83853	17	25	8	3UTR
rno-miR-3547	XM_006246221	Acsl6	TGAGCACCACCCCTCTCTCAGAT#ATTTGAGGGAGGGTACTCAGTGTTTTCTCAGGGTGGGCA#...((.(((((((((((((((((#)))))))))))))...................)))))).	3170	3209	0.961538	-26.1	0	3.10216e-05	0.485	0	0	-8.4155	19	39	13	3UTR
rno-miR-3547	XM_006246222	Acsl6	TGAGCACCACCCCTCTCTCAGAT#ATTTGAGGGAGGGTACTCAGTGTTTTCTCAGGGTGGGCA#...((.(((((((((((((((((#)))))))))))))...................)))))).	3171	3210	0.961538	-26.1	0	3.10216e-05	0.485	0	0	-8.4155	19	39	13	3UTR
rno-miR-3547	XM_006246223	Acsl6	TGAGCACCACCCCTCTCTCAGAT#ATTTGAGGGAGGGTACTCAGTGTTTTCTCAGGGTGGGCA#...((.(((((((((((((((((#)))))))))))))...................)))))).	3358	3397	0.961538	-26.1	0	3.10216e-05	0.485	0	0	-8.4155	19	39	13	3UTR
rno-miR-652-3p	XM_006246221	Acsl6	AATGGCGCCACTAGGGTTGTG#CACAACCTGTGTGGGGACCATC#.(((((.((((..((((((((#))))))))..)))).).)))).	4559	4581	0.980769	-27	0	9.45473e-06	0.515	0	0	-9.97295	17	22	8	3UTR
rno-miR-652-3p	XM_006246222	Acsl6	AATGGCGCCACTAGGGTTGTG#CACAACCTGTGTGGGGACCATC#.(((((.((((..((((((((#))))))))..)))).).)))).	4560	4582	0.980769	-27	0	9.45473e-06	0.515	0	0	-9.97295	17	22	8	3UTR
rno-miR-652-3p	XM_006246223	Acsl6	AATGGCGCCACTAGGGTTGTG#CACAACCTGTGTGGGGACCATC#.(((((.((((..((((((((#))))))))..)))).).)))).	4747	4769	0.980769	-27	0	9.45473e-06	0.515	0	0	-9.97295	17	22	8	3UTR
rno-let-7d-5p	XM_006246221	Acsl6	AGAGGTAGTAGGTTGCATAGTT#CTAGGCAACGTGGACTACCTCA#.((((((((..(((((.(((..#))).)))))....)))))))).	2759	2781	1	-22.3	1	0.00486253	0.559	0	0	-7.86061	16	22	8	3UTR
rno-miR-336-5p	XM_006246221	Acsl6	TCACCCTTCCATATCTAGTCT#GACTCAGATATCTATGTTATTGGAAGGGC#...(((((((((((((((((.#)))).)))))..........)))))))).	4301	4330	1	-20.8	0	0.000736164	0.676	0	0	-6.51454	17	29	8	3UTR
rno-miR-342-5p	XM_006246221	Acsl6	AGGGGTGCTATCTGTGATTGAG#TACAGAAGCACTTCTT#(((((((((.((((((......#))))))))))))))).	3396	3412	1	-18.7	1	0.00788522	0.588	0	0	-5.18008	15	16	15	3UTR
rno-miR-342-3p	XM_006246221	Acsl6	TCTCACACAGAAATCGCACCCGT#TGCATTTCTGGTGAGGC#((((((.(((((((.(((.....#)))))))))))))))).	4193	4210	1	-19	0	9.52513e-05	0.574	0	0	-6.21671	16	17	16	3UTR
rno-miR-346	XM_006246221	Acsl6	TGTCTGCCTGAGTGCCTGCCTCT#GAGGGAGGGTACTCAGTGTTTTCTCAGGGTGGGCAA#(((((((((((((((((.((((.#))))..)))))))))............)))))))).	3174	3210	1	-29.1	1	8.76121e-05	0.471	0	0	-3.93757	21	36	9	3UTR
rno-miR-346	XM_006246221	Acsl6	TGTCTGCCTGAGTGCCTGCCTCT#GGGGGCAGGACTCTGAAAGTATGCAGAGAA#(.((((((.((((.(((((((((#))))))))))))).).......))))).).	3664	3694	1	-26.6	1	0.000158211	0.471	0	0	-7.01448	20	30	13	3UTR
rno-miR-129-5p	XM_006246221	Acsl6	CTTTTTGCGGTCTGGGCTTGC#GCAAATAACACCTTGAAAGCCCAGATCTGAGGAGC#(((((((.(((((((((((..#.)))))))))))))))))).	4208	4243	1	-23.2	1	0.000151944	0.618	0	0	-6.25121	18	20	18	3UTR
rno-let-7a-5p	XM_006246221	Acsl6	TGAGGTAGTAGGTTGTATAGTT#GACTAATAACCAGGTACAGTGAAAGTCTAGGCAACGTGGACTACCTCAT#(((((((((..(((((.(((..#.))).)))))....))))))))).	2733	2782	1	-21.5	1	0.00624741	0.574	0	0	-8.00486	17	24	9	3UTR
rno-let-7c-5p	XM_006246221	Acsl6	TGAGGTAGTAGGTTGTATGGTT#CTAGGCAACGTGGACTACCTCAT#(((((((((..(((((.(((..#))).)))))....))))))))).	2759	2782	1	-21.1	1	0.00624741	0.574	0	0	-8.00486	17	23	9	3UTR
rno-miR-10a-3p	XM_006246221	Acsl6	CAAATTCGTATCTAGGGGAATA#GTTCCCCTAGAAACCTATGGAA#....(((((((((((((((((.#)))))))))))....)))))).	3416	3438	1	-21.2	0	0.00152498	0.559	0	0	-9.54656	17	22	11	3UTR
rno-miR-17-5p	XM_006246221	Acsl6	CAAAGTGCTTACAGTGCAGGTAG#CTGCTCTGCTGAGCTCCACTTCCAGCGCTGTGTGCATTAACTTTGA#((((((((.((((((((.((.((#.)).)).)))))))).))....)))))).	4145	4191	1	-21.9	1	0.00214445	0.529	0	0	-4.99396	20	29	8	3UTR
rno-miR-23a-3p	XM_006246221	Acsl6	ATCACATTGCCAGGGATTTCC#GAAATCCCTGCTAATGG#....(((((.((((((((((.#)))))))))).))))).	3450	3467	1	-20.7	0	0.00293543	0.559	0	0	-10.7891	15	17	10	3UTR
rno-miR-24-3p	XM_006246221	Acsl6	TGGCTCAGTTCAGCAGGAACAG#TGTTTCTGCTAGAGTCTTTGCCT#.(((..(((((((((((((((.#)))))))))).))).))..))).	3225	3248	1	-22.7	0	0.0656911	0.515	0	0	-9.81332	18	23	10	3UTR
rno-miR-25-5p	XM_006246221	Acsl6	AGGCGGAGACACGGGCAATTGC#GCAACAGTCCGCGTACCCATGTTTCTGCTA#.(((((((((((((((..((((#))))..)))))........)))))))))).	3206	3236	1	-23.2	1	0.0278119	0.485	0	0	-3.79332	19	30	10	3UTR
rno-miR-27b-3p	XM_006246221	Acsl6	TTCACAGTGGCTAAGTTCTGC#GCAGAGCTTGGCCAGGTGTGGT#.(((((.((((((((((((((#))))))))))))))..))))).	5066	5088	1	-29.3	0	8.32541e-07	0.406	0	0	-5.33701	19	22	14	3UTR
rno-miR-30c-2-3p	XM_006246221	Acsl6	CTGGGAGAAGGCTGTTTACTCT#AGGGTACTCAGTGTTTTCTCAGG#(((((((((.((((..((((((#))))))..)))).))))))))).	3179	3202	1	-25.4	1	0.000263993	0.456	0	0	-6.14858	19	23	9	3UTR
rno-miR-92a-2-5p	XM_006246221	Acsl6	AGGTGGGGATTAGTGCCATTAC#TAATGGCCTAATTCCATTCCTA#(((..((((((((.(((((((.#)))))))))))))))...))).	3461	3483	1	-22.8	0	0.0554743	0.559	0	0	-11.9455	18	22	15	3UTR
rno-miR-92a-2-5p	XM_006246221	Acsl6	AGGTGGGGATTAGTGCCATTAC#GTAGTTATCCGGGTACTTTTTCCCCCA#.((.(((((..((((((.....#.))))))..))))))).	3975	4002	1	-21.3	0	0.0050038	0.574	0	0	-10.8926	13	17	7	3UTR
rno-miR-98-5p	XM_006246221	Acsl6	TGAGGTAGTAAGTTGTATTGTT#GACTAATAACCAGGTACAGTGAAAGTCTAGGCAACGTGGACTACCTCAT#(((((((((..(((((......#.)))))....))))))))).	2733	2782	1	-19.9	1	0.00624741	0.574	0	0	-8.00486	14	20	9	3UTR
rno-miR-125b-5p	XM_006246221	Acsl6	TCCCTGAGACCCTAACTTGTGA#GAGGGAGGGTACTCAGTGTTTTCTCAGGGT#.((((((((((((..(((....#)))..))))............)))))))).	3174	3204	1	-21.8	1	1.75843e-05	0.471	0	0	-5.38561	15	30	8	3UTR
rno-miR-125b-1-3p	XM_006246221	Acsl6	ACGGGTTAGGCTCTTGGGAGCT#AGTTCCCACGTGACCCGA#.(((((((.(....((((((((#))))))))).))))))).	2868	2886	1	-23.6	1	0.0045855	0.485	0	0	-13.1673	16	18	9	3UTR
rno-miR-134-5p	XM_006246221	Acsl6	TGTGACTGGTTGACCAGAGGGG#CCTCATTAAATAACGATTGTCACCAGTCACAG#(((((((((.((((..((((..#))))..............))))))))))))).	2776	2808	1	-22.9	1	0.00263337	0.603	0	0	-6.14858	17	32	13	3UTR
rno-miR-135a-3p	XM_006246221	Acsl6	TGTAGGGATGGAAGCCATGAAA#ATGGCCTAATTCCATTCCTAGAA#(.((((((((((((((((....#)))))....))))))))))).).	3463	3486	1	-22.2	1	0.148434	0.574	0	0	-5.10125	17	23	11	3UTR
rno-miR-192-3p	XM_006246221	Acsl6	CTGCCAGTTCCATAGGTCACAG#CTGTGATGGGTATGGCAGG#((((((..((((....((((((#))))))))))..)))))).	3727	3746	1	-21.6	0	0.0023022	0.515	0	0	-10.9094	16	19	10	3UTR
rno-miR-196a-5p	XM_006246221	Acsl6	TAGGTAGTTTCATGTTGTTGGG#CCAGGTACAGTGAAAGTCTAGGCAACGTGGACTACCTC#.((((((.((((((((((((((#.))))).))))))))))))))).	2742	2780	1	-21.8	1	0.00344594	0.559	0	0	-6.10696	20	23	15	3UTR
rno-miR-200c-3p	XM_006246221	Acsl6	TAATACTGCCGGGTAATGATG#CGTCATTACCTGACTCAGA#.....(((.((((((((((((#))))))))))))...))).	4290	4309	1	-18.5	0	0.00309924	0.647	0	0	-14.722	15	19	12	3UTR
rno-miR-204-3p	XM_006246221	Acsl6	GCTGGGAAGGCAAAGGGACGTT#AACAGTCCGCGTACCCATGTTTCTGCTAGAGTCTTTGCCTTTCCCAC#..(((((((((((((((((((.#.)))).))).................)))))))).)))).	3208	3255	1	-23.4	1	0.0294006	0.515	0	0	-4.957	19	40	8	3UTR
rno-miR-211-3p	XM_006246221	Acsl6	GGCAAGGACAGCAAAGGGGG#CCCATGTTTCTGCTAGAGTCTTTGCCT#(((((((((((((((.((((#))).).))..))))...))))))))).	3221	3248	1	-20.7	1	0.0656911	0.515	0	0	-4.17062	19	27	9	3UTR
rno-miR-216a-3p	XM_006246221	Acsl6	CACAGTGGTCTCTGGGATTATG#TCCAGAGACCATG#....((((((((((((......#)))))))))))).	4851	4864	1	-21.1	0	0.00279461	0.544	0	0	-9.54656	12	13	12	3UTR
rno-miR-222-3p	XM_006246221	Acsl6	AGCTACATCTGGCTACTGGGT#TGGCCAGGTGTGGTA#.((((((((((((((......#)))))))))))))).	5074	5089	1	-23.2	1	8.83439e-07	0.413	0	0	-4.02637	14	15	14	3UTR
rno-miR-222-3p	XM_006246221	Acsl6	AGCTACATCTGGCTACTGGGT#CCCAGTGGCCACCAGCTA#((((.....(((((((((((.#)))))))))))..)))).	4823	4841	1	-23.9	0	9.11628e-05	0.515	0	0	-14.8713	15	18	11	3UTR
rno-miR-296-3p	XM_006246221	Acsl6	GAGGGTTGGGTGGAGGCTCTCC#GGAGGCCCTTCTCAGCCCA#..((((((((.((.(((.((((#))))))))).)))))))).	2370	2389	1	-27.7	1	0.000910116	0.574	0	0	-8.63862	17	19	9	3UTR
rno-miR-300-3p	XM_006246221	Acsl6	TATGCAAGGGCAAGCTCTCTTC#GAGATGTCCCCTGGAAACAGCAGAGCTTGGCCAGGTGTGG#(((((..((.((((((((((..#.)).)))))))).))..))))).	5047	5087	1	-22.1	0	9.24679e-07	0.415	0	0	-8.62473	17	23	8	3UTR
rno-miR-196b-5p	XM_006246221	Acsl6	TAGGTAGTTTCCTGTTGTTGGG#CCCAACATAGAGAAATCCCTGC#((((..((((((((.(((((((#)))))))))).))))).)))).	3439	3461	1	-19	0	0.0242424	0.574	0	0	-10.693	19	22	10	3UTR
rno-miR-196b-3p	XM_006246221	Acsl6	TCGACAGCACGACACTGCCTTCA#TGGGGGCAGGACTCTGAAAGTATGCAGAGAACTCGTGCAGGTCA#..(((.((((((..(((((((((#))))))))).......................))))))..))).	3663	3707	1	-23.8	0	0.000434885	0.5	0	0	-9.00393	18	44	9	3UTR
rno-miR-448-3p	XM_006246221	Acsl6	TTGCATATGTAGGATGTCCCA#TGGGCCTTAAATGCATCCTACGTC#......(((((((((((((((#))))........))))))))))).	4623	4647	1	-18.7	0	0.03427	0.544	0	0	-15.5666	15	24	11	3UTR
rno-miR-224-3p	XM_006246221	Acsl6	AAATGGTGCCCTAGTGACTACA#TGTAGTTATCCGGGTACTT#....(((((((..(((((((((#)))))))))..))))))).	3974	3993	1	-21.3	0	0.00153146	0.559	0	0	-14.1825	16	19	9	3UTR
rno-miR-20b-5p	XM_006246221	Acsl6	CAAAGTGCTCATAGTGCAGGTAG#CTGCTCTGCTGAGCTCCACTTCCAGCGCTGTGTGCATTAACTTTGA#((((((((.((((((((.((.((#.)).)).)))))))).))....)))))).	4145	4191	1	-22.3	1	0.00214445	0.529	0	0	-4.99396	20	29	8	3UTR
rno-miR-872-3p	XM_006246221	Acsl6	TGAACTATTGCAGTAGCCTCCT#GGGAGGGTACTCAGTGTTTT#.((((.((((.((((.((((((#)))))).)))))))))))).	3176	3196	1	-21	0	0.00319517	0.456	0	0	-8.75211	18	20	12	3UTR
rno-miR-880-3p	XM_006246221	Acsl6	TACTCCATTCATTCTGAGTAGA#TCTTGAGAGAAAGGAGTCAGAATGCCACAGCTCAGAGTGAACGAGC#..(((..((((((((((((...#.)))))))))))).))).	2417	2463	1	-20	0	8.02474e-05	0.559	0	0	-8.40165	15	18	12	3UTR
rno-miR-881-3p	XM_006246221	Acsl6	TAACTGTGGCATTTCTGAATAG#TTATTCTTGAGAGAAAGGAGTCAGAATGCCACAGC#...((((((((.((((((....#.)))))))))))))).	2413	2448	1	-21.8	0	0.0182489	0.603	0	0	-9.86134	14	16	14	3UTR
rno-miR-17-2-3p	XM_006246221	Acsl6	ACTGCACTGCAAGCACTTCTTAC#AGCGTTTTGAGCAGTGCAGTT#((((((((((((((.((......#)).))))...)))))))))).	4412	4433	1	-19.6	1	0.00393598	0.588	0	0	-4.67302	16	21	10	3UTR
rno-miR-181d-3p	XM_006246221	Acsl6	CCACCGGGGGATGAATGTCA#GACATTCATCTCCCC#.....((((((((((((((.#)))))))))))))).	4997	5012	1	-25.6	0	0.00819654	0.603	0	0	-13.6656	14	15	14	3UTR
rno-miR-425-5p	XM_006246221	Acsl6	AATGACACGATCACTCCCGTTGA#TCAGGCAGGCCTGTTGGATGGTCTGTGTCATTG#(((((((((((((.(((......#.)))))))).)))))))).	3891	3924	1	-18.9	1	0.00030281	0.544	0	0	-4.79441	16	19	8	3UTR
rno-miR-455-5p	XM_006246221	Acsl6	TATGTGCCTTTGGACTACATCG#TGATGTAGTTATCCGGGTACT#...((((((...((((((((((#))))))))))....)))))).	3971	3992	1	-20.5	0	0.00176312	0.559	0	0	-13.9286	16	21	10	3UTR
rno-miR-500-5p	XM_006246221	Acsl6	AATCCTTGCTATCTGGGTGCTTAG#GCGCTCAGAAAGTAAA#.....(((((.(((((((((....#))))))))).))))).	4604	4620	1	-19.7	0	0.0125592	0.544	0	0	-16.4904	14	16	9	3UTR
rno-miR-672-5p	XM_006246221	Acsl6	TGAGGTTGGTGTACTGTGTGTGA#GCGCTGTGTGCATTAACTTTG#.(((((((((((((...((((..#))))...))))))))))))).	4169	4190	1	-19.8	1	0.00267812	0.544	0	0	-4.76182	17	21	13	3UTR
rno-miR-758-5p	XM_006246221	Acsl6	TGGTTGACCAGAGAGCACACG#TGCATTTCTGGTGAGGCAA#((.((.(((((((((((....#))).)))))))).)).)).	4193	4212	1	-18.8	0	0.000209175	0.588	0	0	-7.39607	15	19	8	3UTR
rno-miR-652-3p	XM_006246221	Acsl6	AATGGCGCCACTAGGGTTGTG#CACGATCCCAGTGGCCACCAG#..(((.((((((.((((((((#)))))))).))))))..))).	4817	4838	1	-24.4	0	8.97738e-05	0.515	0	0	-8.14709	17	21	8	3UTR
rno-miR-511-5p	XM_006246221	Acsl6	CATGCCTTTTGCTCTGCACTC#GCAGAGCTTGGCCAGGTGTGG#(((((((...(((((((....#)))))))......))))))).	5066	5087	1	-21.2	1	9.24679e-07	0.415	0	0	-8.55011	14	21	7	3UTR
rno-miR-615	XM_006246221	Acsl6	GGGGGTCCCCGGTGCTCGGATC#ATCCGGGTACTTTTTCCCCCA#(((((.....(((((((((((.#)))))))))))....))))).	3981	4002	1	-27.9	0	0.0050038	0.574	0	0	-11.9948	16	21	11	3UTR
rno-miR-653-3p	XM_006246221	Acsl6	TTCACTGGGGTTTGTTTCACTA#TGGTGAGGCAAATAACACCTTGAAAGCCCAGATCTGAGG#((((((((((((((((((((((#))))))))))))).............)))))...)))).	4201	4240	1	-20.9	1	0.000729822	0.603	0	0	-3.93757	22	39	13	3UTR
rno-miR-668	XM_006246221	Acsl6	TGTCACTCGGCTCGGCCCACTACC#GTGGTAGGGCATGAGTCAGTGGA#..(((((.(((((((((((((((.#))))).)))).))))))))))).	4687	4710	1	-27.2	0	0.000779643	0.544	0	0	-7.27064	20	23	11	3UTR
rno-miR-675-5p	XM_006246221	Acsl6	TGGTGCGGAAAGGGCCCACAGT#ACAGTGGGCCTTAAATGCATCC#.((((((...(((((((((.((#)).)))))))))...)))))).	4619	4641	1	-25.2	1	0.00418532	0.529	0	0	-8.40586	17	22	9	3UTR
rno-miR-675-3p	XM_006246221	Acsl6	TGTATGCCCTAACCGCTCAGT#CTGTAGAACACTACCTAGTACAAGAGAAAGTGGTAGGGCATGA#..((((((((.((((((....#.)))))))))))))).	4658	4701	1	-21.7	1	0.00132461	0.559	0	0	-7.78178	14	16	14	3UTR
rno-miR-294	XM_006246221	Acsl6	CTCAAAATGGAGGCCCTATCT#AGGTAGGGGTTGCATTTA#....(((((.((.((((((((#)))))))).)).))))).	3078	3096	1	-19.3	0	0.00447933	0.603	0	0	-12.0782	15	18	8	3UTR
rno-miR-465-5p	XM_006246221	Acsl6	TATTTAGAACGGTGCTGGTGTG#CACTTCCAGCGCTGTG#........((((((((((.(((#)))..)))))))))).	4161	4177	1	-19.8	0	0.00645396	0.515	0	0	-19.4239	13	16	10	3UTR
rno-miR-344b-5p	XM_006246221	Acsl6	AGTCAGGCTGCTGGTTATATTC#GAGTGAACGAGCACCTGATTT#(((((((.((((.(((.(((((#)))))))).))))))))))).	2451	2472	1	-20.8	1	0.00653886	0.559	0	0	-7.54034	19	21	11	3UTR
rno-miR-3558-5p	XM_006246221	Acsl6	CCATAGAAGTCATCCCACAGTGCC#GGCCTGTTGGATGGTCTGTGT#.((((((..((((((.((((.(((#))))))).)))))))))))).	3898	3919	1	-23.9	1	8.63248e-05	0.529	0	0	-7.3964	19	21	12	3UTR
rno-miR-3558-3p	XM_006246221	Acsl6	ACTGTGGAGGGTTTCTATGT#CAAGGAGGCCCTTCTCAGC#.(((.(((((((((((.((.#)).))))))))))).))).	2367	2386	1	-21.7	0	0.000574336	0.544	0	0	-7.91236	16	19	11	3UTR
rno-miR-3561-3p	XM_006246221	Acsl6	TATCCAGGGTAGACACTCAGA#TCGAGATGTCCCCTGGAA#..(((((((..(((((((.((#))))).))))))))))).	5045	5063	1	-20	1	0.00114524	0.5	0	0	-9.02428	16	18	11	3UTR
rno-miR-3564	XM_006246221	Acsl6	TGGGAAATGCAAAGAGGGAAG#CCCATGTTTCTGCTAGAGTCTTTGCCTTTCCCAC#(((((((.((((((((((...#)))...............))))))).))))))).	3221	3255	1	-21.2	1	0.0294006	0.515	0	0	-6.25121	17	34	7	3UTR
rno-miR-3574	XM_006246221	Acsl6	TCAGCCGCTGTCACACGCACAG#TGTCTGTGACAGGTCTGGGAAACGCAATACGGCTGAA#(((((((((((((((.(((...#))).)))))))).................))))))).	3263	3300	1	-24.3	1	0.00589835	0.574	0	0	-4.17062	18	37	8	3UTR
rno-miR-3574	XM_006246221	Acsl6	TCAGCCGCTGTCACACGCACAG#TGTGCGTCGGCGGCG#...(((((((....(((((((.#)))))))))))))).	3131	3146	1	-23.9	0	0.000134313	0.5	0	0	-14.8321	14	15	14	3UTR
rno-miR-3596b	XM_006246221	Acsl6	AACTATGCAACCTACTACCT#AGGTAGGGGTTGCATT#....(((((((((.((((((#))))))))))))))).	3078	3094	1	-21.3	0	0.00395737	0.588	0	0	-10.4034	15	16	15	3UTR
rno-miR-3596c	XM_006246221	Acsl6	ACTATACAACCTCCTACCTCA#AGGTAGGGGTTGC#......(((((.(((((((..#)))))))))))).	3078	3091	1	-18.9	0	0.00363118	0.603	0	0	-18.9134	12	13	12	3UTR
rno-miR-3590-5p	XM_006246221	Acsl6	TGCCCTTTTAACATTGCACTG#GTGCACCTGAGGAGGGGCAA#(((((((((.....(((((..#))))).....))))))))).	3616	3636	1	-19.9	1	0.000884471	0.471	0	0	-13.4976	14	20	9	3UTR
rno-miR-3595	XM_006246221	Acsl6	GTGGATTTTCCTCTACGAT#GTATGGCAGGACAAGAACTCCTTAGCTCTGAGGGAAATCCAA#.((((((((((((...((.#.)).)))))))))))).	3736	3778	1	-17.9	1	0.000269403	0.574	0	0	-5.61866	14	17	12	3UTR
rno-miR-1843a-3p	XM_006246221	Acsl6	TCTGATCGTTCACCTCCATACA#TGTATGTGAGTGAACGTTCTCAGTCAGAA#((((((((((((.(((((((((#)))))).)))))))))......)))))).	3849	3878	1	-22.4	1	0.00439017	0.471	0	0	-5.22671	21	29	9	3UTR
rno-miR-6318	XM_006246221	Acsl6	CTGCCTGGCGCAGGGCCTGTAG#CAGGACCTCGCACAGGCTAGGCAA#.((((((((((.(((((((...#)))).))).))....)))))))).	4118	4142	1	-25.4	1	7.67862e-05	0.426	0	0	-7.14013	17	24	8	3UTR
rno-miR-6321	XM_006246221	Acsl6	TACTGCAGTGAGTTCTATGAAGC#GCAGGACTCTGAAAGTATGCAGAGAACTCGTGCAGG#..(((((.((((((((.((....#.)).))))))))))))).	3668	3704	1	-19.8	0	1.21264e-05	0.485	0	0	-7.27064	15	18	13	3UTR
rno-miR-1247-3p	XM_006246221	Acsl6	CGGGAACGTCGAGACTGGAGC#GCAACAGTCCGCGTACCCA#.(((.(((.((.(((((..((#))..)))))))))).))).	3206	3225	1	-21.4	0	0.00177743	0.485	0	0	-12.3156	15	19	10	3UTR
rno-miR-1896	XM_006246221	Acsl6	TGGTGGGTGAGGAGGAGG#CCTGCCTCATCCATCAG#(((((((((((((((...#))).)))))))))))).	3878	3895	1	-24.5	1	0.00259109	0.471	0	0	-4.17062	15	17	12	3UTR
rno-miR-3084a-3p	XM_006246221	Acsl6	TTCTGCCAGTCCCCTTCAGACA#TCTGTGATGGGTATGGCAGGAC#((((((((..(((...((((..#))))....)))..)))))))).	3726	3748	1	-22.9	1	0.00548957	0.515	0	0	-8.06181	15	22	8	3UTR
rno-miR-3084a-5p	XM_006246221	Acsl6	GTTGAAGGTTAATTAGCAGAGT#GCTCTGCTGAGCTCCACTTCCAGCG#((((.((((...((((((((((#)))))))))).....)))).)))).	4147	4172	1	-21.1	0	0.00134884	0.515	0	0	-15.4707	18	25	10	3UTR
rno-miR-486	XM_006246221	Acsl6	TCCTGTACTGAGCTGCCCCGAG#CTCTTCCGTGGGGGCAGGACTCTGAAAGTATGCAGAGAACTCGTGCAGGT#.(((((((.((((((((((.(.#.).)))))))......................)))))))))).	3655	3705	1	-26.3	1	3.63934e-05	0.5	0	0	-4.84971	18	43	10	3UTR
rno-let-7d-5p	XM_006246222	Acsl6	AGAGGTAGTAGGTTGCATAGTT#CTAGGCAACGTGGACTACCTCA#.((((((((..(((((.(((..#))).)))))....)))))))).	2760	2782	1	-22.3	1	0.00486253	0.559	0	0	-7.86061	16	22	8	3UTR
rno-miR-336-5p	XM_006246222	Acsl6	TCACCCTTCCATATCTAGTCT#GACTCAGATATCTATGTTATTGGAAGGGC#...(((((((((((((((((.#)))).)))))..........)))))))).	4302	4331	1	-20.8	0	0.000736164	0.676	0	0	-6.51454	17	29	8	3UTR
rno-miR-342-3p	XM_006246222	Acsl6	TCTCACACAGAAATCGCACCCGT#TGCATTTCTGGTGAGGC#((((((.(((((((.(((.....#)))))))))))))))).	4194	4211	1	-19	0	9.52513e-05	0.574	0	0	-6.21671	16	17	16	3UTR
rno-miR-346	XM_006246222	Acsl6	TGTCTGCCTGAGTGCCTGCCTCT#GAGGGAGGGTACTCAGTGTTTTCTCAGGGTGGGCAA#(((((((((((((((((.((((.#))))..)))))))))............)))))))).	3175	3211	1	-29.1	1	8.76121e-05	0.471	0	0	-3.93757	21	36	9	3UTR
rno-miR-346	XM_006246222	Acsl6	TGTCTGCCTGAGTGCCTGCCTCT#GGGGGCAGGACTCTGAAAGTATGCAGAGAA#(.((((((.((((.(((((((((#))))))))))))).).......))))).).	3665	3695	1	-26.6	1	0.000158211	0.471	0	0	-7.01448	20	30	13	3UTR
rno-miR-129-5p	XM_006246222	Acsl6	CTTTTTGCGGTCTGGGCTTGC#GCAAATAACACCTTGAAAGCCCAGATCTGAGGAGC#(((((((.(((((((((((..#.)))))))))))))))))).	4209	4244	1	-23.2	1	0.000151944	0.618	0	0	-6.25121	18	20	18	3UTR
rno-let-7a-5p	XM_006246222	Acsl6	TGAGGTAGTAGGTTGTATAGTT#GACTAATAACCAGGTACAGTGAAAGTCTAGGCAACGTGGACTACCTCAT#(((((((((..(((((.(((..#.))).)))))....))))))))).	2734	2783	1	-21.5	1	0.00624741	0.574	0	0	-8.00486	17	24	9	3UTR
rno-let-7c-5p	XM_006246222	Acsl6	TGAGGTAGTAGGTTGTATGGTT#CTAGGCAACGTGGACTACCTCAT#(((((((((..(((((.(((..#))).)))))....))))))))).	2760	2783	1	-21.1	1	0.00624741	0.574	0	0	-8.00486	17	23	9	3UTR
rno-miR-10a-3p	XM_006246222	Acsl6	CAAATTCGTATCTAGGGGAATA#GTTCCCCTAGAAACCTATGGAA#....(((((((((((((((((.#)))))))))))....)))))).	3417	3439	1	-21.2	0	0.00152498	0.559	0	0	-9.54656	17	22	11	3UTR
rno-miR-17-5p	XM_006246222	Acsl6	CAAAGTGCTTACAGTGCAGGTAG#CTGCTCTGCTGAGCTCCACTTCCAGCGCTGTGTGCATTAACTTTGA#((((((((.((((((((.((.((#.)).)).)))))))).))....)))))).	4146	4192	1	-21.9	1	0.00214445	0.529	0	0	-4.99396	20	29	8	3UTR
rno-miR-23a-3p	XM_006246222	Acsl6	ATCACATTGCCAGGGATTTCC#GAAATCCCTGCTAATGG#....(((((.((((((((((.#)))))))))).))))).	3451	3468	1	-20.7	0	0.00293543	0.559	0	0	-10.7891	15	17	10	3UTR
rno-miR-24-3p	XM_006246222	Acsl6	TGGCTCAGTTCAGCAGGAACAG#TGTTTCTGCTAGAGTCTTTGCCT#.(((..(((((((((((((((.#)))))))))).))).))..))).	3226	3249	1	-22.7	0	0.0656911	0.515	0	0	-9.81332	18	23	10	3UTR
rno-miR-25-5p	XM_006246222	Acsl6	AGGCGGAGACACGGGCAATTGC#GCAACAGTCCGCGTACCCATGTTTCTGCTA#.(((((((((((((((..((((#))))..)))))........)))))))))).	3207	3237	1	-23.2	1	0.0278119	0.485	0	0	-3.79332	19	30	10	3UTR
rno-miR-27b-3p	XM_006246222	Acsl6	TTCACAGTGGCTAAGTTCTGC#GCAGAGCTTGGCCAGGTGTGGT#.(((((.((((((((((((((#))))))))))))))..))))).	5067	5089	1	-29.3	0	8.32541e-07	0.406	0	0	-5.33701	19	22	14	3UTR
rno-miR-30c-2-3p	XM_006246222	Acsl6	CTGGGAGAAGGCTGTTTACTCT#AGGGTACTCAGTGTTTTCTCAGG#(((((((((.((((..((((((#))))))..)))).))))))))).	3180	3203	1	-25.4	1	0.000263993	0.456	0	0	-6.14858	19	23	9	3UTR
rno-miR-92a-2-5p	XM_006246222	Acsl6	AGGTGGGGATTAGTGCCATTAC#TAATGGCCTAATTCCATTCCTA#(((..((((((((.(((((((.#)))))))))))))))...))).	3462	3484	1	-22.8	0	0.0554743	0.559	0	0	-11.9455	18	22	15	3UTR
rno-miR-92a-2-5p	XM_006246222	Acsl6	AGGTGGGGATTAGTGCCATTAC#GTAGTTATCCGGGTACTTTTTCCCCCA#.((.(((((..((((((.....#.))))))..))))))).	3976	4003	1	-21.3	0	0.0050038	0.574	0	0	-10.8926	13	17	7	3UTR
rno-miR-98-5p	XM_006246222	Acsl6	TGAGGTAGTAAGTTGTATTGTT#GACTAATAACCAGGTACAGTGAAAGTCTAGGCAACGTGGACTACCTCAT#(((((((((..(((((......#.)))))....))))))))).	2734	2783	1	-19.9	1	0.00624741	0.574	0	0	-8.00486	14	20	9	3UTR
rno-miR-125b-5p	XM_006246222	Acsl6	TCCCTGAGACCCTAACTTGTGA#GAGGGAGGGTACTCAGTGTTTTCTCAGGGT#.((((((((((((..(((....#)))..))))............)))))))).	3175	3205	1	-21.8	1	1.75843e-05	0.471	0	0	-5.38561	15	30	8	3UTR
rno-miR-125b-1-3p	XM_006246222	Acsl6	ACGGGTTAGGCTCTTGGGAGCT#AGTTCCCACGTGACCCGA#.(((((((.(....((((((((#))))))))).))))))).	2869	2887	1	-23.6	1	0.0045855	0.485	0	0	-13.1673	16	18	9	3UTR
rno-miR-134-5p	XM_006246222	Acsl6	TGTGACTGGTTGACCAGAGGGG#CCTCATTAAATAACGATTGTCACCAGTCACAG#(((((((((.((((..((((..#))))..............))))))))))))).	2777	2809	1	-22.9	1	0.00263337	0.603	0	0	-6.14858	17	32	13	3UTR
rno-miR-135a-3p	XM_006246222	Acsl6	TGTAGGGATGGAAGCCATGAAA#ATGGCCTAATTCCATTCCTAGAA#(.((((((((((((((((....#)))))....))))))))))).).	3464	3487	1	-22.2	1	0.148434	0.574	0	0	-5.10125	17	23	11	3UTR
rno-miR-192-3p	XM_006246222	Acsl6	CTGCCAGTTCCATAGGTCACAG#CTGTGATGGGTATGGCAGG#((((((..((((....((((((#))))))))))..)))))).	3728	3747	1	-21.6	0	0.0023022	0.515	0	0	-10.9094	16	19	10	3UTR
rno-miR-196a-5p	XM_006246222	Acsl6	TAGGTAGTTTCATGTTGTTGGG#CCAGGTACAGTGAAAGTCTAGGCAACGTGGACTACCTC#.((((((.((((((((((((((#.))))).))))))))))))))).	2743	2781	1	-21.8	1	0.00344594	0.559	0	0	-6.10696	20	23	15	3UTR
rno-miR-200c-3p	XM_006246222	Acsl6	TAATACTGCCGGGTAATGATG#CGTCATTACCTGACTCAGA#.....(((.((((((((((((#))))))))))))...))).	4291	4310	1	-18.5	0	0.00309924	0.647	0	0	-14.722	15	19	12	3UTR
rno-miR-204-3p	XM_006246222	Acsl6	GCTGGGAAGGCAAAGGGACGTT#AACAGTCCGCGTACCCATGTTTCTGCTAGAGTCTTTGCCTTTCCCAC#..(((((((((((((((((((.#.)))).))).................)))))))).)))).	3209	3256	1	-23.4	1	0.0294006	0.515	0	0	-4.957	19	40	8	3UTR
rno-miR-211-3p	XM_006246222	Acsl6	GGCAAGGACAGCAAAGGGGG#CCCATGTTTCTGCTAGAGTCTTTGCCT#(((((((((((((((.((((#))).).))..))))...))))))))).	3222	3249	1	-20.7	1	0.0656911	0.515	0	0	-4.17062	19	27	9	3UTR
rno-miR-216a-3p	XM_006246222	Acsl6	CACAGTGGTCTCTGGGATTATG#TCCAGAGACCATG#....((((((((((((......#)))))))))))).	4852	4865	1	-21.1	0	0.00279461	0.544	0	0	-9.54656	12	13	12	3UTR
rno-miR-222-3p	XM_006246222	Acsl6	AGCTACATCTGGCTACTGGGT#TGGCCAGGTGTGGTA#.((((((((((((((......#)))))))))))))).	5075	5090	1	-23.2	1	8.83439e-07	0.413	0	0	-4.02637	14	15	14	3UTR
rno-miR-222-3p	XM_006246222	Acsl6	AGCTACATCTGGCTACTGGGT#CCCAGTGGCCACCAGCTA#((((.....(((((((((((.#)))))))))))..)))).	4824	4842	1	-23.9	0	9.11628e-05	0.515	0	0	-14.8713	15	18	11	3UTR
rno-miR-296-3p	XM_006246222	Acsl6	GAGGGTTGGGTGGAGGCTCTCC#GGAGGCCCTTCTCAGCCCA#..((((((((.((.(((.((((#))))))))).)))))))).	2371	2390	1	-27.7	1	0.000910116	0.574	0	0	-8.63862	17	19	9	3UTR
rno-miR-300-3p	XM_006246222	Acsl6	TATGCAAGGGCAAGCTCTCTTC#GAGATGTCCCCTGGAAACAGCAGAGCTTGGCCAGGTGTGG#(((((..((.((((((((((..#.)).)))))))).))..))))).	5048	5088	1	-22.1	0	9.24679e-07	0.415	0	0	-8.62473	17	23	8	3UTR
rno-miR-196b-5p	XM_006246222	Acsl6	TAGGTAGTTTCCTGTTGTTGGG#CCCAACATAGAGAAATCCCTGC#((((..((((((((.(((((((#)))))))))).))))).)))).	3440	3462	1	-19	0	0.0242424	0.574	0	0	-10.693	19	22	10	3UTR
rno-miR-196b-3p	XM_006246222	Acsl6	TCGACAGCACGACACTGCCTTCA#TGGGGGCAGGACTCTGAAAGTATGCAGAGAACTCGTGCAGGTCA#..(((.((((((..(((((((((#))))))))).......................))))))..))).	3664	3708	1	-23.8	0	0.000434885	0.5	0	0	-9.00393	18	44	9	3UTR
rno-miR-448-3p	XM_006246222	Acsl6	TTGCATATGTAGGATGTCCCA#TGGGCCTTAAATGCATCCTACGTC#......(((((((((((((((#))))........))))))))))).	4624	4648	1	-18.7	0	0.03427	0.544	0	0	-15.5666	15	24	11	3UTR
rno-miR-224-3p	XM_006246222	Acsl6	AAATGGTGCCCTAGTGACTACA#TGTAGTTATCCGGGTACTT#....(((((((..(((((((((#)))))))))..))))))).	3975	3994	1	-21.3	0	0.00153146	0.559	0	0	-14.1825	16	19	9	3UTR
rno-miR-20b-5p	XM_006246222	Acsl6	CAAAGTGCTCATAGTGCAGGTAG#CTGCTCTGCTGAGCTCCACTTCCAGCGCTGTGTGCATTAACTTTGA#((((((((.((((((((.((.((#.)).)).)))))))).))....)))))).	4146	4192	1	-22.3	1	0.00214445	0.529	0	0	-4.99396	20	29	8	3UTR
rno-miR-872-3p	XM_006246222	Acsl6	TGAACTATTGCAGTAGCCTCCT#GGGAGGGTACTCAGTGTTTT#.((((.((((.((((.((((((#)))))).)))))))))))).	3177	3197	1	-21	0	0.00319517	0.456	0	0	-8.75211	18	20	12	3UTR
rno-miR-880-3p	XM_006246222	Acsl6	TACTCCATTCATTCTGAGTAGA#TCTTGAGAGAAAGGAGTCAGAATGCCACAGCTCAGAGTGAACGAGC#..(((..((((((((((((...#.)))))))))))).))).	2418	2464	1	-20	0	8.02474e-05	0.559	0	0	-8.40165	15	18	12	3UTR
rno-miR-881-3p	XM_006246222	Acsl6	TAACTGTGGCATTTCTGAATAG#TTATTCTTGAGAGAAAGGAGTCAGAATGCCACAGC#...((((((((.((((((....#.)))))))))))))).	2414	2449	1	-21.8	0	0.0182489	0.603	0	0	-9.86134	14	16	14	3UTR
rno-miR-17-2-3p	XM_006246222	Acsl6	ACTGCACTGCAAGCACTTCTTAC#AGCGTTTTGAGCAGTGCAGTT#((((((((((((((.((......#)).))))...)))))))))).	4413	4434	1	-19.6	1	0.00393598	0.588	0	0	-4.67302	16	21	10	3UTR
rno-miR-181d-3p	XM_006246222	Acsl6	CCACCGGGGGATGAATGTCA#GACATTCATCTCCCC#.....((((((((((((((.#)))))))))))))).	4998	5013	1	-25.6	0	0.00819654	0.603	0	0	-13.6656	14	15	14	3UTR
rno-miR-425-5p	XM_006246222	Acsl6	AATGACACGATCACTCCCGTTGA#TCAGGCAGGCCTGTTGGATGGTCTGTGTCATTG#(((((((((((((.(((......#.)))))))).)))))))).	3892	3925	1	-18.9	1	0.00030281	0.544	0	0	-4.79441	16	19	8	3UTR
rno-miR-455-5p	XM_006246222	Acsl6	TATGTGCCTTTGGACTACATCG#TGATGTAGTTATCCGGGTACT#...((((((...((((((((((#))))))))))....)))))).	3972	3993	1	-20.5	0	0.00176312	0.559	0	0	-13.9286	16	21	10	3UTR
rno-miR-500-5p	XM_006246222	Acsl6	AATCCTTGCTATCTGGGTGCTTAG#GCGCTCAGAAAGTAAA#.....(((((.(((((((((....#))))))))).))))).	4605	4621	1	-19.7	0	0.0125592	0.544	0	0	-16.4904	14	16	9	3UTR
rno-miR-672-5p	XM_006246222	Acsl6	TGAGGTTGGTGTACTGTGTGTGA#GCGCTGTGTGCATTAACTTTG#.(((((((((((((...((((..#))))...))))))))))))).	4170	4191	1	-19.8	1	0.00267812	0.544	0	0	-4.76182	17	21	13	3UTR
rno-miR-758-5p	XM_006246222	Acsl6	TGGTTGACCAGAGAGCACACG#TGCATTTCTGGTGAGGCAA#((.((.(((((((((((....#))).)))))))).)).)).	4194	4213	1	-18.8	0	0.000209175	0.588	0	0	-7.39607	15	19	8	3UTR
rno-miR-652-3p	XM_006246222	Acsl6	AATGGCGCCACTAGGGTTGTG#CACGATCCCAGTGGCCACCAG#..(((.((((((.((((((((#)))))))).))))))..))).	4818	4839	1	-24.4	0	8.97738e-05	0.515	0	0	-8.14709	17	21	8	3UTR
rno-miR-511-5p	XM_006246222	Acsl6	CATGCCTTTTGCTCTGCACTC#GCAGAGCTTGGCCAGGTGTGG#(((((((...(((((((....#)))))))......))))))).	5067	5088	1	-21.2	1	9.24679e-07	0.415	0	0	-8.55011	14	21	7	3UTR
rno-miR-615	XM_006246222	Acsl6	GGGGGTCCCCGGTGCTCGGATC#ATCCGGGTACTTTTTCCCCCA#(((((.....(((((((((((.#)))))))))))....))))).	3982	4003	1	-27.9	0	0.0050038	0.574	0	0	-11.9948	16	21	11	3UTR
rno-miR-653-3p	XM_006246222	Acsl6	TTCACTGGGGTTTGTTTCACTA#TGGTGAGGCAAATAACACCTTGAAAGCCCAGATCTGAGG#((((((((((((((((((((((#))))))))))))).............)))))...)))).	4202	4241	1	-20.9	1	0.000729822	0.603	0	0	-3.93757	22	39	13	3UTR
rno-miR-668	XM_006246222	Acsl6	TGTCACTCGGCTCGGCCCACTACC#GTGGTAGGGCATGAGTCAGTGGA#..(((((.(((((((((((((((.#))))).)))).))))))))))).	4688	4711	1	-27.2	0	0.000779643	0.544	0	0	-7.27064	20	23	11	3UTR
rno-miR-675-5p	XM_006246222	Acsl6	TGGTGCGGAAAGGGCCCACAGT#ACAGTGGGCCTTAAATGCATCC#.((((((...(((((((((.((#)).)))))))))...)))))).	4620	4642	1	-25.2	1	0.00418532	0.529	0	0	-8.40586	17	22	9	3UTR
rno-miR-675-3p	XM_006246222	Acsl6	TGTATGCCCTAACCGCTCAGT#CTGTAGAACACTACCTAGTACAAGAGAAAGTGGTAGGGCATGA#..((((((((.((((((....#.)))))))))))))).	4659	4702	1	-21.7	1	0.00132461	0.559	0	0	-7.78178	14	16	14	3UTR
rno-miR-294	XM_006246222	Acsl6	CTCAAAATGGAGGCCCTATCT#AGGTAGGGGTTGCATTTA#....(((((.((.((((((((#)))))))).)).))))).	3079	3097	1	-19.3	0	0.00447933	0.603	0	0	-12.0782	15	18	8	3UTR
rno-miR-465-5p	XM_006246222	Acsl6	TATTTAGAACGGTGCTGGTGTG#CACTTCCAGCGCTGTG#........((((((((((.(((#)))..)))))))))).	4162	4178	1	-19.8	0	0.00645396	0.515	0	0	-19.4239	13	16	10	3UTR
rno-miR-344b-5p	XM_006246222	Acsl6	AGTCAGGCTGCTGGTTATATTC#GAGTGAACGAGCACCTGATTT#(((((((.((((.(((.(((((#)))))))).))))))))))).	2452	2473	1	-20.8	1	0.00653886	0.559	0	0	-7.54034	19	21	11	3UTR
rno-miR-3558-5p	XM_006246222	Acsl6	CCATAGAAGTCATCCCACAGTGCC#GGCCTGTTGGATGGTCTGTGT#.((((((..((((((.((((.(((#))))))).)))))))))))).	3899	3920	1	-23.9	1	8.63248e-05	0.529	0	0	-7.3964	19	21	12	3UTR
rno-miR-3558-3p	XM_006246222	Acsl6	ACTGTGGAGGGTTTCTATGT#CAAGGAGGCCCTTCTCAGC#.(((.(((((((((((.((.#)).))))))))))).))).	2368	2387	1	-21.7	0	0.000574336	0.544	0	0	-7.91236	16	19	11	3UTR
rno-miR-3561-3p	XM_006246222	Acsl6	TATCCAGGGTAGACACTCAGA#TCGAGATGTCCCCTGGAA#..(((((((..(((((((.((#))))).))))))))))).	5046	5064	1	-20	1	0.00114524	0.5	0	0	-9.02428	16	18	11	3UTR
rno-miR-3564	XM_006246222	Acsl6	TGGGAAATGCAAAGAGGGAAG#CCCATGTTTCTGCTAGAGTCTTTGCCTTTCCCAC#(((((((.((((((((((...#)))...............))))))).))))))).	3222	3256	1	-21.2	1	0.0294006	0.515	0	0	-6.25121	17	34	7	3UTR
rno-miR-3574	XM_006246222	Acsl6	TCAGCCGCTGTCACACGCACAG#TGTCTGTGACAGGTCTGGGAAACGCAATACGGCTGAA#(((((((((((((((.(((...#))).)))))))).................))))))).	3264	3301	1	-24.3	1	0.00589835	0.574	0	0	-4.17062	18	37	8	3UTR
rno-miR-3574	XM_006246222	Acsl6	TCAGCCGCTGTCACACGCACAG#TGTGCGTCGGCGGCG#...(((((((....(((((((.#)))))))))))))).	3132	3147	1	-23.9	0	0.000134313	0.5	0	0	-14.8321	14	15	14	3UTR
rno-miR-3596b	XM_006246222	Acsl6	AACTATGCAACCTACTACCT#AGGTAGGGGTTGCATT#....(((((((((.((((((#))))))))))))))).	3079	3095	1	-21.3	0	0.00395737	0.588	0	0	-10.4034	15	16	15	3UTR
rno-miR-3596c	XM_006246222	Acsl6	ACTATACAACCTCCTACCTCA#AGGTAGGGGTTGC#......(((((.(((((((..#)))))))))))).	3079	3092	1	-18.9	0	0.00363118	0.603	0	0	-18.9134	12	13	12	3UTR
rno-miR-3590-5p	XM_006246222	Acsl6	TGCCCTTTTAACATTGCACTG#GTGCACCTGAGGAGGGGCAA#(((((((((.....(((((..#))))).....))))))))).	3617	3637	1	-19.9	1	0.000884471	0.471	0	0	-13.4976	14	20	9	3UTR
rno-miR-3595	XM_006246222	Acsl6	GTGGATTTTCCTCTACGAT#GTATGGCAGGACAAGAACTCCTTAGCTCTGAGGGAAATCCAA#.((((((((((((...((.#.)).)))))))))))).	3737	3779	1	-17.9	1	0.000269403	0.574	0	0	-5.61866	14	17	12	3UTR
rno-miR-1843a-3p	XM_006246222	Acsl6	TCTGATCGTTCACCTCCATACA#TGTATGTGAGTGAACGTTCTCAGTCAGAA#((((((((((((.(((((((((#)))))).)))))))))......)))))).	3850	3879	1	-22.4	1	0.00439017	0.471	0	0	-5.22671	21	29	9	3UTR
rno-miR-3099	XM_006246222	Acsl6	TAGGCTAGAAAGAGGTTGGGGA#CCTCGATTTCTTTTCCTAT#((((...((((((((((((((.#)))))))))))))))))).	3312	3331	1	-19.8	0	0.00199664	0.603	0	0	-11.5013	18	19	18	3UTR
rno-miR-6318	XM_006246222	Acsl6	CTGCCTGGCGCAGGGCCTGTAG#CAGGACCTCGCACAGGCTAGGCAA#.((((((((((.(((((((...#)))).))).))....)))))))).	4119	4143	1	-25.4	1	7.67862e-05	0.426	0	0	-7.14013	17	24	8	3UTR
rno-miR-6321	XM_006246222	Acsl6	TACTGCAGTGAGTTCTATGAAGC#GCAGGACTCTGAAAGTATGCAGAGAACTCGTGCAGG#..(((((.((((((((.((....#.)).))))))))))))).	3669	3705	1	-19.8	0	1.21264e-05	0.485	0	0	-7.27064	15	18	13	3UTR
rno-miR-1247-3p	XM_006246222	Acsl6	CGGGAACGTCGAGACTGGAGC#GCAACAGTCCGCGTACCCA#.(((.(((.((.(((((..((#))..)))))))))).))).	3207	3226	1	-21.4	0	0.00177743	0.485	0	0	-12.3156	15	19	10	3UTR
rno-miR-1896	XM_006246222	Acsl6	TGGTGGGTGAGGAGGAGG#CCTGCCTCATCCATCAG#(((((((((((((((...#))).)))))))))))).	3879	3896	1	-24.5	1	0.00259109	0.471	0	0	-4.17062	15	17	12	3UTR
rno-miR-3084a-3p	XM_006246222	Acsl6	TTCTGCCAGTCCCCTTCAGACA#TCTGTGATGGGTATGGCAGGAC#((((((((..(((...((((..#))))....)))..)))))))).	3727	3749	1	-22.9	1	0.00548957	0.515	0	0	-8.06181	15	22	8	3UTR
rno-miR-3084a-5p	XM_006246222	Acsl6	GTTGAAGGTTAATTAGCAGAGT#GCTCTGCTGAGCTCCACTTCCAGCG#((((.((((...((((((((((#)))))))))).....)))).)))).	4148	4173	1	-21.1	0	0.00134884	0.515	0	0	-15.4707	18	25	10	3UTR
rno-miR-486	XM_006246222	Acsl6	TCCTGTACTGAGCTGCCCCGAG#CTCTTCCGTGGGGGCAGGACTCTGAAAGTATGCAGAGAACTCGTGCAGGT#.(((((((.((((((((((.(.#.).)))))))......................)))))))))).	3656	3706	1	-26.3	1	3.63934e-05	0.5	0	0	-4.84971	18	43	10	3UTR
rno-let-7d-5p	XM_006246223	Acsl6	AGAGGTAGTAGGTTGCATAGTT#CTAGGCAACGTGGACTACCTCA#.((((((((..(((((.(((..#))).)))))....)))))))).	2947	2969	1	-22.3	1	0.00486253	0.559	0	0	-7.86061	16	22	8	3UTR
rno-miR-336-5p	XM_006246223	Acsl6	TCACCCTTCCATATCTAGTCT#GACTCAGATATCTATGTTATTGGAAGGGC#...(((((((((((((((((.#)))).)))))..........)))))))).	4489	4518	1	-20.8	0	0.000736164	0.676	0	0	-6.51454	17	29	8	3UTR
rno-miR-342-5p	XM_006246223	Acsl6	AGGGGTGCTATCTGTGATTGAG#TACAGAAGCACTTCTT#(((((((((.((((((......#))))))))))))))).	3584	3600	1	-18.7	1	0.00788522	0.588	0	0	-5.18008	15	16	15	3UTR
rno-miR-342-3p	XM_006246223	Acsl6	TCTCACACAGAAATCGCACCCGT#TGCATTTCTGGTGAGGC#((((((.(((((((.(((.....#)))))))))))))))).	4381	4398	1	-19	0	9.52513e-05	0.574	0	0	-6.21671	16	17	16	3UTR
rno-miR-346	XM_006246223	Acsl6	TGTCTGCCTGAGTGCCTGCCTCT#GAGGGAGGGTACTCAGTGTTTTCTCAGGGTGGGCAA#(((((((((((((((((.((((.#))))..)))))))))............)))))))).	3362	3398	1	-29.1	1	8.76121e-05	0.471	0	0	-3.93757	21	36	9	3UTR
rno-miR-346	XM_006246223	Acsl6	TGTCTGCCTGAGTGCCTGCCTCT#GGGGGCAGGACTCTGAAAGTATGCAGAGAA#(.((((((.((((.(((((((((#))))))))))))).).......))))).).	3852	3882	1	-26.6	1	0.000158211	0.471	0	0	-7.01448	20	30	13	3UTR
rno-miR-129-5p	XM_006246223	Acsl6	CTTTTTGCGGTCTGGGCTTGC#GCAAATAACACCTTGAAAGCCCAGATCTGAGGAGC#(((((((.(((((((((((..#.)))))))))))))))))).	4396	4431	1	-23.2	1	0.000151944	0.618	0	0	-6.25121	18	20	18	3UTR
rno-let-7a-5p	XM_006246223	Acsl6	TGAGGTAGTAGGTTGTATAGTT#GACTAATAACCAGGTACAGTGAAAGTCTAGGCAACGTGGACTACCTCAT#(((((((((..(((((.(((..#.))).)))))....))))))))).	2921	2970	1	-21.5	1	0.00624741	0.574	0	0	-8.00486	17	24	9	3UTR
rno-let-7c-5p	XM_006246223	Acsl6	TGAGGTAGTAGGTTGTATGGTT#CTAGGCAACGTGGACTACCTCAT#(((((((((..(((((.(((..#))).)))))....))))))))).	2947	2970	1	-21.1	1	0.00624741	0.574	0	0	-8.00486	17	23	9	3UTR
rno-miR-10a-3p	XM_006246223	Acsl6	CAAATTCGTATCTAGGGGAATA#GTTCCCCTAGAAACCTATGGAA#....(((((((((((((((((.#)))))))))))....)))))).	3604	3626	1	-21.2	0	0.00152498	0.559	0	0	-9.54656	17	22	11	3UTR
rno-miR-17-5p	XM_006246223	Acsl6	CAAAGTGCTTACAGTGCAGGTAG#CTGCTCTGCTGAGCTCCACTTCCAGCGCTGTGTGCATTAACTTTGA#((((((((.((((((((.((.((#.)).)).)))))))).))....)))))).	4333	4379	1	-21.9	1	0.00214445	0.529	0	0	-4.99396	20	29	8	3UTR
rno-miR-23a-3p	XM_006246223	Acsl6	ATCACATTGCCAGGGATTTCC#GAAATCCCTGCTAATGG#....(((((.((((((((((.#)))))))))).))))).	3638	3655	1	-20.7	0	0.00293543	0.559	0	0	-10.7891	15	17	10	3UTR
rno-miR-24-3p	XM_006246223	Acsl6	TGGCTCAGTTCAGCAGGAACAG#TGTTTCTGCTAGAGTCTTTGCCT#.(((..(((((((((((((((.#)))))))))).))).))..))).	3413	3436	1	-22.7	0	0.0656911	0.515	0	0	-9.81332	18	23	10	3UTR
rno-miR-25-5p	XM_006246223	Acsl6	AGGCGGAGACACGGGCAATTGC#GCAACAGTCCGCGTACCCATGTTTCTGCTA#.(((((((((((((((..((((#))))..)))))........)))))))))).	3394	3424	1	-23.2	1	0.0278119	0.485	0	0	-3.79332	19	30	10	3UTR
rno-miR-27b-3p	XM_006246223	Acsl6	TTCACAGTGGCTAAGTTCTGC#GCAGAGCTTGGCCAGGTGTGGT#.(((((.((((((((((((((#))))))))))))))..))))).	5254	5276	1	-29.3	0	8.32541e-07	0.406	0	0	-5.33701	19	22	14	3UTR
rno-miR-30c-2-3p	XM_006246223	Acsl6	CTGGGAGAAGGCTGTTTACTCT#AGGGTACTCAGTGTTTTCTCAGG#(((((((((.((((..((((((#))))))..)))).))))))))).	3367	3390	1	-25.4	1	0.000263993	0.456	0	0	-6.14858	19	23	9	3UTR
rno-miR-92a-1-5p	XM_006246223	Acsl6	AGGTTGGGATTTGTCGCAATGCT#TTGCCGACACGATGCCAACTC#.((((((.(((((((((((....#)))).)))).))).)))))).	3099	3120	1	-19.1	1	0.263389	0.574	0	0	-6.10696	17	21	6	3UTR
rno-miR-92a-2-5p	XM_006246223	Acsl6	AGGTGGGGATTAGTGCCATTAC#TAATGGCCTAATTCCATTCCTA#(((..((((((((.(((((((.#)))))))))))))))...))).	3649	3671	1	-22.8	0	0.0554743	0.559	0	0	-11.9455	18	22	15	3UTR
rno-miR-92a-2-5p	XM_006246223	Acsl6	AGGTGGGGATTAGTGCCATTAC#GTAGTTATCCGGGTACTTTTTCCCCCA#.((.(((((..((((((.....#.))))))..))))))).	4163	4190	1	-21.3	0	0.0050038	0.574	0	0	-10.8926	13	17	7	3UTR
rno-miR-98-5p	XM_006246223	Acsl6	TGAGGTAGTAAGTTGTATTGTT#GACTAATAACCAGGTACAGTGAAAGTCTAGGCAACGTGGACTACCTCAT#(((((((((..(((((......#.)))))....))))))))).	2921	2970	1	-19.9	1	0.00624741	0.574	0	0	-8.00486	14	20	9	3UTR
rno-miR-125a-3p	XM_006246223	Acsl6	ACAGGTGAGGTTCTTGGGAGCC#GCTTCTGTTGAACTTCACAACCTGTG#(((((((((((((.(((((((.#)))))))..)))))))...)))))).	4732	4758	1	-23.6	1	0.000663438	0.544	0	0	-4.79441	20	26	7	3UTR
rno-miR-125b-5p	XM_006246223	Acsl6	TCCCTGAGACCCTAACTTGTGA#GAGGGAGGGTACTCAGTGTTTTCTCAGGGT#.((((((((((((..(((....#)))..))))............)))))))).	3362	3392	1	-21.8	1	1.75843e-05	0.471	0	0	-5.38561	15	30	8	3UTR
rno-miR-134-5p	XM_006246223	Acsl6	TGTGACTGGTTGACCAGAGGGG#CCTCATTAAATAACGATTGTCACCAGTCACAG#(((((((((.((((..((((..#))))..............))))))))))))).	2964	2996	1	-22.9	1	0.00263337	0.603	0	0	-6.14858	17	32	13	3UTR
rno-miR-135a-3p	XM_006246223	Acsl6	TGTAGGGATGGAAGCCATGAAA#ATGGCCTAATTCCATTCCTAGAA#(.((((((((((((((((....#)))))....))))))))))).).	3651	3674	1	-22.2	1	0.148434	0.574	0	0	-5.10125	17	23	11	3UTR
rno-miR-181b-5p	XM_006246223	Acsl6	AACATTCATTGCTGTCGGTGGGT#CGGCGACAGCAAATGGAC#....(((((((((((((.((...#)).))))))))).)))).	3329	3347	1	-19.9	0	0.00405462	0.456	0	0	-9.54656	15	18	9	3UTR
rno-miR-187-3p	XM_006246223	Acsl6	TCGTGTCTTGTGTTGCAGCCGG#TCGGCGGCGACAGCAAATGGACTCTTGGCGAA#((((((((((((((((.(((((#))))).)))))).))...)))).....)))).	3325	3357	1	-22	1	0.0332426	0.471	0	0	-3.93757	21	32	6	3UTR
rno-miR-192-3p	XM_006246223	Acsl6	CTGCCAGTTCCATAGGTCACAG#CTGTGATGGGTATGGCAGG#((((((..((((....((((((#))))))))))..)))))).	3915	3934	1	-21.6	0	0.0023022	0.515	0	0	-10.9094	16	19	10	3UTR
rno-miR-196a-5p	XM_006246223	Acsl6	TAGGTAGTTTCATGTTGTTGGG#CTAATAACCAGGTACAGTGAAAGTCTAGGCAACGTGGACTACCTC#.((((((.((((((((((((((#.))))).))))))))))))))).	2923	2968	1	-21.8	1	0.00344594	0.559	0	0	-6.10696	20	23	15	3UTR
rno-miR-200c-3p	XM_006246223	Acsl6	TAATACTGCCGGGTAATGATG#CGTCATTACCTGACTCAGA#.....(((.((((((((((((#))))))))))))...))).	4478	4497	1	-18.5	0	0.00309924	0.647	0	0	-14.722	15	19	12	3UTR
rno-miR-204-3p	XM_006246223	Acsl6	GCTGGGAAGGCAAAGGGACGTT#AACAGTCCGCGTACCCATGTTTCTGCTAGAGTCTTTGCCTTTCCCAC#..(((((((((((((((((((.#.)))).))).................)))))))).)))).	3396	3443	1	-23.4	1	0.0294006	0.515	0	0	-4.957	19	40	8	3UTR
rno-miR-211-3p	XM_006246223	Acsl6	GGCAAGGACAGCAAAGGGGG#CCCATGTTTCTGCTAGAGTCTTTGCCT#(((((((((((((((.((((#))).).))..))))...))))))))).	3409	3436	1	-20.7	1	0.0656911	0.515	0	0	-4.17062	19	27	9	3UTR
rno-miR-222-3p	XM_006246223	Acsl6	AGCTACATCTGGCTACTGGGT#TGGCCAGGTGTGGTA#.((((((((((((((......#)))))))))))))).	5262	5277	1	-23.2	1	8.83439e-07	0.413	0	0	-4.02637	14	15	14	3UTR
rno-miR-222-3p	XM_006246223	Acsl6	AGCTACATCTGGCTACTGGGT#CCCAGTGGCCACCAGCTA#((((.....(((((((((((.#)))))))))))..)))).	5011	5029	1	-23.9	0	9.11628e-05	0.515	0	0	-14.8713	15	18	11	3UTR
rno-miR-296-3p	XM_006246223	Acsl6	GAGGGTTGGGTGGAGGCTCTCC#GGAGGCCCTTCTCAGCCCA#..((((((((.((.(((.((((#))))))))).)))))))).	2558	2577	1	-27.7	1	0.000910116	0.574	0	0	-8.63862	17	19	9	3UTR
rno-miR-300-3p	XM_006246223	Acsl6	TATGCAAGGGCAAGCTCTCTTC#AGCAGAGCTTGGCCAGGTGTGG#(((((..((.((((((((((..#)).)))))))).))..))))).	5253	5275	1	-21.6	0	9.24679e-07	0.415	0	0	-8.62473	17	22	8	3UTR
rno-miR-196b-5p	XM_006246223	Acsl6	TAGGTAGTTTCCTGTTGTTGGG#CCCAACATAGAGAAATCCCTGC#((((..((((((((.(((((((#)))))))))).))))).)))).	3627	3649	1	-19	0	0.0242424	0.574	0	0	-10.693	19	22	10	3UTR
rno-miR-196b-3p	XM_006246223	Acsl6	TCGACAGCACGACACTGCCTTCA#TGGGGGCAGGACTCTGAAAGTATGCAGAGAACTCGTGCAGGTCA#..(((.((((((..(((((((((#))))))))).......................))))))..))).	3851	3895	1	-23.8	0	0.000434885	0.5	0	0	-9.00393	18	44	9	3UTR
rno-miR-448-3p	XM_006246223	Acsl6	TTGCATATGTAGGATGTCCCA#TGGGCCTTAAATGCATCCTACGTC#......(((((((((((((((#))))........))))))))))).	4811	4835	1	-18.7	0	0.03427	0.544	0	0	-15.5666	15	24	11	3UTR
rno-miR-224-3p	XM_006246223	Acsl6	AAATGGTGCCCTAGTGACTACA#TGTAGTTATCCGGGTACTT#....(((((((..(((((((((#)))))))))..))))))).	4162	4181	1	-21.3	0	0.00153146	0.559	0	0	-14.1825	16	19	9	3UTR
rno-miR-409a-3p	XM_006246223	Acsl6	AATGTTGCTCGGTGAACCCC#GTTCACCGAAACATTC#((((((..(((((((((...#))))))))))))))).	3229	3245	1	-17.6	0	0.106278	0.618	0	0	-7.7949	15	16	15	3UTR
rno-miR-20b-5p	XM_006246223	Acsl6	CAAAGTGCTCATAGTGCAGGTAG#CTGCTCTGCTGAGCTCCACTTCCAGCGCTGTGTGCATTAACTTTGA#((((((((.((((((((.((.((#.)).)).)))))))).))....)))))).	4333	4379	1	-22.3	1	0.00214445	0.529	0	0	-4.99396	20	29	8	3UTR
rno-miR-872-3p	XM_006246223	Acsl6	TGAACTATTGCAGTAGCCTCCT#GGGAGGGTACTCAGTGTTTT#.((((.((((.((((.((((((#)))))).)))))))))))).	3364	3384	1	-21	0	0.00319517	0.456	0	0	-8.75211	18	20	12	3UTR
rno-miR-880-3p	XM_006246223	Acsl6	TACTCCATTCATTCTGAGTAGA#TCTTGAGAGAAAGGAGTCAGAATGCCACAGCTCAGAGTGAACGAGC#..(((..((((((((((((...#.)))))))))))).))).	2605	2651	1	-20	0	8.02474e-05	0.559	0	0	-8.40165	15	18	12	3UTR
rno-miR-881-3p	XM_006246223	Acsl6	TAACTGTGGCATTTCTGAATAG#TTATTCTTGAGAGAAAGGAGTCAGAATGCCACAGC#...((((((((.((((((....#.)))))))))))))).	2601	2636	1	-21.8	0	0.0182489	0.603	0	0	-9.86134	14	16	14	3UTR
rno-miR-17-2-3p	XM_006246223	Acsl6	ACTGCACTGCAAGCACTTCTTAC#AGCGTTTTGAGCAGTGCAGTT#((((((((((((((.((......#)).))))...)))))))))).	4600	4621	1	-19.6	1	0.00393598	0.588	0	0	-4.67302	16	21	10	3UTR
rno-miR-181d-3p	XM_006246223	Acsl6	CCACCGGGGGATGAATGTCA#GACATTCATCTCCCC#.....((((((((((((((.#)))))))))))))).	5185	5200	1	-25.6	0	0.00819654	0.603	0	0	-13.6656	14	15	14	3UTR
rno-miR-425-5p	XM_006246223	Acsl6	AATGACACGATCACTCCCGTTGA#TCAGGCAGGCCTGTTGGATGGTCTGTGTCATTG#(((((((((((((.(((......#.)))))))).)))))))).	4079	4112	1	-18.9	1	0.00030281	0.544	0	0	-4.79441	16	19	8	3UTR
rno-miR-455-5p	XM_006246223	Acsl6	TATGTGCCTTTGGACTACATCG#TGATGTAGTTATCCGGGTACT#...((((((...((((((((((#))))))))))....)))))).	4159	4180	1	-20.5	0	0.00176312	0.559	0	0	-13.9286	16	21	10	3UTR
rno-miR-758-5p	XM_006246223	Acsl6	TGGTTGACCAGAGAGCACACG#TGCATTTCTGGTGAGGCAA#((.((.(((((((((((....#))).)))))))).)).)).	4381	4400	1	-18.8	0	0.000209175	0.588	0	0	-7.39607	15	19	8	3UTR
rno-miR-652-3p	XM_006246223	Acsl6	AATGGCGCCACTAGGGTTGTG#CACGATCCCAGTGGCCACCAG#..(((.((((((.((((((((#)))))))).))))))..))).	5005	5026	1	-24.4	0	8.97738e-05	0.515	0	0	-8.14709	17	21	8	3UTR
rno-miR-511-5p	XM_006246223	Acsl6	CATGCCTTTTGCTCTGCACTC#GCAGAGCTTGGCCAGGTGTGG#(((((((...(((((((....#)))))))......))))))).	5254	5275	1	-21.2	1	9.24679e-07	0.415	0	0	-8.55011	14	21	7	3UTR
rno-miR-615	XM_006246223	Acsl6	GGGGGTCCCCGGTGCTCGGATC#ATCCGGGTACTTTTTCCCCCA#(((((.....(((((((((((.#)))))))))))....))))).	4169	4190	1	-27.9	0	0.0050038	0.574	0	0	-11.9948	16	21	11	3UTR
rno-miR-653-3p	XM_006246223	Acsl6	TTCACTGGGGTTTGTTTCACTA#TGGTGAGGCAAATAACACCTTGAAAGCCCAGATCTGAGG#((((((((((((((((((((((#))))))))))))).............)))))...)))).	4389	4428	1	-20.9	1	0.000729822	0.603	0	0	-3.93757	22	39	13	3UTR
rno-miR-668	XM_006246223	Acsl6	TGTCACTCGGCTCGGCCCACTACC#GTGGTAGGGCATGAGTCAGTGGA#..(((((.(((((((((((((((.#))))).)))).))))))))))).	4875	4898	1	-27.2	0	0.000779643	0.544	0	0	-7.27064	20	23	11	3UTR
rno-miR-675-5p	XM_006246223	Acsl6	TGGTGCGGAAAGGGCCCACAGT#ACAGTGGGCCTTAAATGCATCC#.((((((...(((((((((.((#)).)))))))))...)))))).	4807	4829	1	-25.2	1	0.00418532	0.529	0	0	-8.40586	17	22	9	3UTR
rno-miR-675-3p	XM_006246223	Acsl6	TGTATGCCCTAACCGCTCAGT#CTGTAGAACACTACCTAGTACAAGAGAAAGTGGTAGGGCATGA#..((((((((.((((((....#.)))))))))))))).	4846	4889	1	-21.7	1	0.00132461	0.559	0	0	-7.78178	14	16	14	3UTR
rno-miR-294	XM_006246223	Acsl6	CTCAAAATGGAGGCCCTATCT#AGGTAGGGGTTGCATTTA#....(((((.((.((((((((#)))))))).)).))))).	3266	3284	1	-19.3	0	0.00447933	0.603	0	0	-12.0782	15	18	8	3UTR
rno-miR-465-5p	XM_006246223	Acsl6	TATTTAGAACGGTGCTGGTGTG#CACTTCCAGCGCTGTG#........((((((((((.(((#)))..)))))))))).	4349	4365	1	-19.8	0	0.00645396	0.515	0	0	-19.4239	13	16	10	3UTR
rno-miR-761	XM_006246223	Acsl6	GCAGCAGGGTGAAACTGACACA#TGTTTAGTTGCACCCTAAATCTGGGTGCC#(((.(((((((.((((((.(((#))))))))).)))))).......).))).	3719	3748	1	-18.7	0	6.85706e-05	0.588	0	0	-10.3164	19	29	9	3UTR
rno-miR-3546	XM_006246223	Acsl6	ATAACCCGGGCCAAAAGCTCAC#GAGCTTGGCCAGGTGTG#...((((.(((((..(((((..#)))))))))).)).)).	5257	5274	1	-21	0	7.53643e-07	0.409	0	0	-10.4205	14	17	10	3UTR
rno-miR-344b-5p	XM_006246223	Acsl6	AGTCAGGCTGCTGGTTATATTC#GAGTGAACGAGCACCTGATTT#(((((((.((((.(((.(((((#)))))))).))))))))))).	2639	2660	1	-20.8	1	0.00653886	0.559	0	0	-7.54034	19	21	11	3UTR
rno-miR-3557-5p	XM_006246223	Acsl6	GCCTTCTGACTCCAAGTCCAGT#TTGAGAGAAAGGAGTCAGAATGCC#((.((((((((((...(((((.#))).))....)))))))))).)).	2607	2631	1	-21.1	0	0.00814287	0.603	0	0	-7.32045	17	24	10	3UTR
rno-miR-3558-5p	XM_006246223	Acsl6	CCATAGAAGTCATCCCACAGTGCC#GGCCTGTTGGATGGTCTGTGT#.((((((..((((((.((((.(((#))))))).)))))))))))).	4086	4107	1	-23.9	1	8.63248e-05	0.529	0	0	-7.3964	19	21	12	3UTR
rno-miR-3558-3p	XM_006246223	Acsl6	ACTGTGGAGGGTTTCTATGT#CAAGGAGGCCCTTCTCAGC#.(((.(((((((((((.((.#)).))))))))))).))).	2555	2574	1	-21.7	0	0.000574336	0.544	0	0	-7.91236	16	19	11	3UTR
rno-miR-3561-3p	XM_006246223	Acsl6	TATCCAGGGTAGACACTCAGA#TCTTTATCCAAAGCATCGAGATGTCCCCTGGAA#..(((((((..(((((((.((#.))))).))))))))))).	5218	5251	1	-20.3	1	0.00114524	0.5	0	0	-9.02428	16	19	11	3UTR
rno-miR-3564	XM_006246223	Acsl6	TGGGAAATGCAAAGAGGGAAG#TCTTTGCCTTTCCCAC#(((((((.(((((((......#))))))).))))))).	3427	3443	1	-19.7	1	0.0294006	0.515	0	0	-6.48426	14	16	7	3UTR
rno-miR-3574	XM_006246223	Acsl6	TCAGCCGCTGTCACACGCACAG#CTGCTAGAGTCTTTGCCTTTCCCACTCTCAATATGTCTGTGACAGGTCTGGGAAACGCAATACGGCTGAA#(((((((((((((((.(((...#.))).)))))))).................))))))).	3418	3488	1	-24.4	1	0.00589835	0.574	0	0	-4.17062	18	38	8	3UTR
rno-miR-3574	XM_006246223	Acsl6	TCAGCCGCTGTCACACGCACAG#TGTGCGTCGGCGGCG#...(((((((....(((((((.#)))))))))))))).	3319	3334	1	-23.9	0	0.000134313	0.5	0	0	-14.8321	14	15	14	3UTR
rno-miR-3596b	XM_006246223	Acsl6	AACTATGCAACCTACTACCT#AGGTAGGGGTTGCATT#....(((((((((.((((((#))))))))))))))).	3266	3282	1	-21.3	0	0.00395737	0.588	0	0	-10.4034	15	16	15	3UTR
rno-miR-3596c	XM_006246223	Acsl6	ACTATACAACCTCCTACCTCA#AGGTAGGGGTTGC#......(((((.(((((((..#)))))))))))).	3266	3279	1	-18.9	0	0.00363118	0.603	0	0	-18.9134	12	13	12	3UTR
rno-miR-3590-5p	XM_006246223	Acsl6	TGCCCTTTTAACATTGCACTG#GTGCACCTGAGGAGGGGCAA#(((((((((.....(((((..#))))).....))))))))).	3804	3824	1	-19.9	1	0.000884471	0.471	0	0	-13.4976	14	20	9	3UTR
rno-miR-3595	XM_006246223	Acsl6	GTGGATTTTCCTCTACGAT#GTATGGCAGGACAAGAACTCCTTAGCTCTGAGGGAAATCCAA#.((((((((((((...((.#.)).)))))))))))).	3924	3966	1	-17.9	1	0.000269403	0.574	0	0	-5.61866	14	17	12	3UTR
rno-miR-1843a-3p	XM_006246223	Acsl6	TCTGATCGTTCACCTCCATACA#TGTATGTGAGTGAACGTTCTCAGTCAGAA#((((((((((((.(((((((((#)))))).)))))))))......)))))).	4037	4066	1	-22.4	1	0.00439017	0.471	0	0	-5.22671	21	29	9	3UTR
rno-miR-6318	XM_006246223	Acsl6	CTGCCTGGCGCAGGGCCTGTAG#CAGGACCTCGCACAGGCTAGGCAA#.((((((((((.(((((((...#)))).))).))....)))))))).	4306	4330	1	-25.4	1	7.67862e-05	0.426	0	0	-7.14013	17	24	8	3UTR
rno-miR-6321	XM_006246223	Acsl6	TACTGCAGTGAGTTCTATGAAGC#GCAGGACTCTGAAAGTATGCAGAGAACTCGTGCAGG#..(((((.((((((((.((....#.)).))))))))))))).	3856	3892	1	-19.8	0	1.21264e-05	0.485	0	0	-7.27064	15	18	13	3UTR
rno-miR-679	XM_006246223	Acsl6	CAAGGTCTTCCTCACAGTAGC#GAGGAAGACTA#...((((((((((........#)))))))))).	3534	3545	1	-18	0	0.000657305	0.662	0	0	-8.33988	10	11	10	3UTR
rno-miR-1247-3p	XM_006246223	Acsl6	CGGGAACGTCGAGACTGGAGC#GCAACAGTCCGCGTACCCA#.(((.(((.((.(((((..((#))..)))))))))).))).	3394	3413	1	-21.4	0	0.00177743	0.485	0	0	-12.3156	15	19	10	3UTR
rno-miR-1896	XM_006246223	Acsl6	TGGTGGGTGAGGAGGAGG#CCTGCCTCATCCATCAG#(((((((((((((((...#))).)))))))))))).	4066	4083	1	-24.5	1	0.00259109	0.471	0	0	-4.17062	15	17	12	3UTR
rno-miR-3084a-5p	XM_006246223	Acsl6	GTTGAAGGTTAATTAGCAGAGT#GCTCTGCTGAGCTCCACTTCCAGCG#((((.((((...((((((((((#)))))))))).....)))).)))).	4335	4360	1	-21.1	0	0.00134884	0.515	0	0	-15.4707	18	25	10	3UTR
rno-miR-486	XM_006246223	Acsl6	TCCTGTACTGAGCTGCCCCGAG#CTCTTCCGTGGGGGCAGGACTCTGAAAGTATGCAGAGAACTCGTGCAGGT#.(((((((.((((((((((.(.#.).)))))))......................)))))))))).	3843	3893	1	-26.3	1	3.63934e-05	0.5	0	0	-4.84971	18	43	10	3UTR
rno-miR-24-3p	NM_130739	Acsl6	TGGCTCAGTTCAGCAGGAACAG#TTTTTGCAACTGAGCCT#.(((((((((..(((((((...#)))))))))))))))).	2347	2364	1	-21.1	1	0.10898	0.618	0.860646	1.00637	-9.9649	16	17	16	3UTR
rno-miR-30c-1-3p	NM_130739	Acsl6	CTGGGAGAGGGTTGTTTACTCC#GAGTGAACGAGCACCTGATTTTTTTTTTTTGCAACTGAGCCTTTCCTG#..((((((((.((((((((((.#))))))))............................)).)))))))).	2322	2370	1	-20.4	1	0.0721364	0.632	0.691355	1.07604	-7.78178	18	48	8	3UTR
rno-miR-127-3p	NM_130739	Acsl6	TCGGATCCGTCTGAGCTTGGCT#GCCACAGCTCAGAGTGAACGAG#(((..((..((((((((((((.#)))).))))))))..)).))).	2311	2333	1	-24.9	0	0.000632858	0.559	0.69508	0.770313	-14.4587	17	22	8	3UTR
rno-miR-296-3p	NM_130739	Acsl6	GAGGGTTGGGTGGAGGCTCTCC#GGAGGCCCTTCTCAGCCCA#..((((((((.((.(((.((((#))))))))).)))))))).	2241	2260	1	-27.7	1	0.000910116	0.574	0.559283	1.20658	-8.63862	17	19	9	3UTR
rno-miR-298-5p	NM_130739	Acsl6	GGCAGAGGAGGGCTGTTCTTCCC#AAGGAGGCCCTTCTCAGCCC#(((.((((((((((.(((((...#))))))))))))))).))).	2239	2259	1	-26.2	0	0.000666595	0.559	0.609335	1.31412	-7.70505	18	20	15	3UTR
rno-miR-881-3p	NM_130739	Acsl6	TAACTGTGGCATTTCTGAATAG#TTATTCTTGAGAGAAAGGAGTCAGAATGCCACAGC#...((((((((.((((((....#.)))))))))))))).	2284	2319	1	-21.8	0	0.0182489	0.603	1.02598	0.725672	-9.86134	14	16	14	3UTR
rno-miR-344b-5p	NM_130739	Acsl6	AGTCAGGCTGCTGGTTATATTC#GAGTGAACGAGCACCTGATTT#(((((((.((((.(((.(((((#)))))))).))))))))))).	2322	2343	1	-20.8	1	0.00653886	0.559	0.457826	0.905588	-7.54034	19	21	11	3UTR
rno-miR-1912-5p	NM_130739	Acsl6	TGCTCATTGCATGGGCTATGT#AGCCCAGCAAAGTTTGCAGCAA#((((((((((.((((((....#))))))))))....)).)))).	2254	2276	1	-19	1	0.00797124	0.574	0.540796	1.00772	-6.76235	16	22	10	3UTR
rno-miR-1896	NM_130739	Acsl6	TGGTGGGTGAGGAGGAGG#CCTTCTCAGCCCAGCAA#((.((((((((((((...#)))))))).)))).)).	2247	2264	1	-22.7	0	0.00758774	0.559	0.595183	1.29789	-5.72816	14	17	8	3UTR
rno-miR-146b-3p	NM_138907	Acot2	CCTAGGGACTCAGTTCTGGTG#TCGGAGCTGGGGACCG#....((..(((((((((((..#)))))))))))..)).	1864	1880	0.961538	-21.6	0	0.000130413	0.544	0	0.0570514	-13.4039	13	16	11	3UTR
rno-miR-18a-5p	XM_006240320	Acot2	TAAGGTGCATCTAGTGCAGATAG#TGTCTGTGTGGATGCCCA#...((.(((((((..(((((((.#))))))).))))))))).	1941	1959	0.961538	-21.5	0	0.00322622	0.515	0	0	-10.0078	16	18	9	3UTR
rno-miR-448-3p	XM_006240320	Acot2	TTGCATATGTAGGATGTCCCA#GGATGTCTTTACCCATTGCGAG#(((((...(((((((((((..#))))))))).))....))))).	1820	1842	0.961538	-15.4	0	0.0253888	0.515	0	0	-9.69585	16	22	9	3UTR
rno-miR-881-3p	NM_138907	Acot2	TAACTGTGGCATTTCTGAATAG#TCAGAATGCCACTTCAGTTT#.((((((((((.((((((....#))))))))))))...)))).	1577	1597	0.974359	-18	1	0.0522128	0.691	-0.716825	-0.222857	-7.14013	16	20	12	3UTR
rno-miR-3074	NM_138907	Acot2	GATATCAGCTCAGTAGGCACCG#GAAATTAAAACTTCCTTATAAAACTGTGCCTATTGACCTGGTGA#..((((((.(((((((((((..#.))))))))))).)))))).	2066	2110	0.980769	-24.3	1	0.0011884	0.574	0.22272	-0.0137464	-6.01339	17	20	11	3UTR
rno-miR-10a-5p	NM_138907	Acot2	TACCCTGTAGATCCGAATTTGTG#ACAGCTTGAGATTGTCTTTCCCCCAGGATCTACATGGTAG#((((.(((((((((.........#.))))))))).)))).	2147	2187	1	-20.1	0	7.45195e-05	0.515	0.0744236	0.0600388	-9.02511	13	16	9	3UTR
rno-miR-24-1-5p	NM_138907	Acot2	GTGCCTACTGAGCTGATATCAG#CTGAGGATATAGCTTAGTGGCAA#.((((.(((((((((...((((#)))).....))))))))))))).	1983	2006	1	-21.2	0	0.000550719	0.559	-0.0577112	-0.0168081	-5.92733	17	23	13	3UTR
rno-miR-25-5p	NM_138907	Acot2	AGGCGGAGACACGGGCAATTGC#GCCTGAATTCTGAGGTTGGCCGGCCTCTGCCTC#((((((((.(.(((.(((((..#.))))).)))).)))))))).	1764	1797	1	-24.2	1	3.55404e-06	0.382	-0.280464	0.102783	-8.55419	17	21	8	3UTR
rno-miR-33-3p	NM_138907	Acot2	CAATGTTTCCACAGTGCATCA#GTGCCTGTGAGAGACT#....((((((((((.((((..#))))))))).))))).	1969	1985	1	-17.6	0	0.00082108	0.662	0.00256818	-0.00184037	-10.282	14	16	9	3UTR
rno-miR-96-3p	NM_138907	Acot2	CAATCATGTGCAGTGCCAATAT#TGGCAATGCATTTGAC#...(((.(((((.(((((....#))))).))))).))).	2000	2016	1	-17.2	0	0.0114297	0.603	-0.0634764	0.0213895	-9.34736	13	16	5	3UTR
rno-miR-142-5p	NM_138907	Acot2	CATAAAGTAGAAAGCACTACT#AGTGGTGCTTTCTGCC#......(((((((((((((((#))))))))))))))).	2124	2140	1	-23.4	0	0.000697387	0.471	0.0359843	0.140851	-15.5666	15	16	15	3UTR
rno-miR-181b-2-3p	NM_138907	Acot2	CTCACTGGTCAATGAATGCAAA#TGCCTATTGACCTGGTGAGA#((((((((((((((...(((..#))).)))))))).)))))).	2092	2112	1	-21.3	1	0.0591732	0.544	0.0749037	0.108959	-4.90607	17	20	8	3UTR
rno-miR-183-5p	NM_138907	Acot2	TATGGCACTGGTAGAATTCACT#ATTCTCCAGTGCTATAA#(((((((((((.(((((.....#)))))))))))))))).	2040	2057	1	-21.6	1	0.00914699	0.676	-0.0917823	0.0438224	-7.28438	16	17	16	3UTR
rno-miR-184	NM_138907	Acot2	TGGACGGAGAACTGATAAGGGT#GCCCTGAATTCATTCTCCAGTGCT#.(.((((((((.(((..(((((#)))))....))))))))).)).).	2029	2053	1	-19.9	0	0.0115959	0.662	-0.192248	0.0813907	-8.93072	17	24	9	3UTR
rno-miR-192-3p	NM_138907	Acot2	CTGCCAGTTCCATAGGTCACAG#CTGTGCCTATTGACCTGGTGAGA#(((((((.((.(((((.(((((#)))))))))).)).))))).)).	2089	2112	1	-22.2	1	0.0591732	0.544	0.111661	0.0970666	-9.07598	19	23	10	3UTR
rno-miR-196a-5p	NM_138907	Acot2	TAGGTAGTTTCATGTTGTTGGG#CCTGACAGCTTGAGATTGTCTT#.(((((((((((.(((((((((#))))))))).))))))))))).	2143	2165	1	-20.6	1	0.00549119	0.485	0.00256856	0.0432817	-5.08246	20	22	11	3UTR
rno-miR-200a-5p	NM_138907	Acot2	CATCTTACCGGACAGTGCTGG#CCTATTGACCTGGTGAGATGG#(((((((((((.(((((....#.)))))..))))))))))).	2094	2115	1	-19.2	1	0.000123047	0.515	0.193236	0.128419	-7.28438	16	20	11	3UTR
rno-miR-200b-5p	NM_138907	Acot2	CATCTTACTGGGCAGCATTGGA#TCCTTATAAAACTGTGCCTATTGACCTGGTGAGATGG#((((((((((((((((((....#.))))....)).)))))))))))).	2078	2115	1	-21.1	1	0.000123047	0.515	0.0999103	0.0519304	-3.93757	18	25	12	3UTR
rno-miR-217-3p	NM_138907	Acot2	ATCAGTTCCTAATGCATTGCCT#GGCAATGCATTTGACTT#...((((...(((((((((((.#))))))))))).)))).	2001	2018	1	-19.5	0	0.0426839	0.588	-0.0603318	0.0403088	-11.1271	15	17	11	3UTR
rno-miR-296-3p	NM_138907	Acot2	GAGGGTTGGGTGGAGGCTCTCC#GGCCGGCCTCTGCCTCCCA#..(((..(((((((((((..((#))..)))))))))))))).	1781	1800	1	-25.1	0	9.09823e-05	0.412	0.0548503	0.125197	-8.40165	16	19	14	3UTR
rno-miR-297	NM_138907	Acot2	ATGTATGTGTGCATGTATGCATG#TGCACATGCACACAC#.....(((((((((((..(((..#)))))))))))))).	2233	2248	1	-19.9	0	0.00585381	0.588	0.112644	0.116527	-13.6656	14	15	14	3UTR
rno-miR-298-5p	NM_138907	Acot2	GGCAGAGGAGGGCTGTTCTTCCC#GAGGTTGGCCGGCCTCTGCCT#((((((((..(((((.((((...#)))).)))))..)))))))).	1775	1796	1	-27.9	1	2.16126e-06	0.397	0.111584	0.0903873	-6.46952	17	21	8	3UTR
rno-miR-300-3p	NM_138907	Acot2	TATGCAAGGGCAAGCTCTCTTC#GAACCCAGGGCCTTGCGCTTGCT#...(((((.(((((((((....#.))))).)))).))))).	1879	1902	1	-21.7	0	1.82356e-06	0.412	0	0.0355346	-7.57093	14	18	5	3UTR
rno-miR-370-3p	NM_138907	Acot2	GCCTGCTGGGGTGGAACCTGGT#GCTGGGGACCGAACCCAGGGCCTTGCGCTTGCTAGGCA#((((((((((.(((..((((((#))))))..)))..)))))..............))))).	1869	1907	1	-24.9	1	0.000129735	0.412	0	0.0233243	-7.73085	19	38	6	3UTR
rno-miR-540-3p	NM_138907	Acot2	AGGTCAGAGGTCGATCCTGGGC#CCCAGGATCTACATGGTAGGAGAGAACCAACTCTGACA#..(((((((((.(((((((((.#))))))))).))..................))))))).	2168	2206	1	-26.5	1	0.00117614	0.471	0.146497	0.00165929	-8.3038	18	38	9	3UTR
rno-miR-466c-5p	NM_138907	Acot2	TGTGATGTGTGTATGTACATG#TGCACATGCACACACAA#..((.(((((((((((.((..#)).))))))))))))).	2233	2250	1	-17.3	0	0.00565273	0.603	0.112644	0.116527	-9.07604	15	17	13	3UTR
rno-miR-196c-5p	NM_138907	Acot2	TAGGTAGTTTCGTGTTGTTGGG#CCTGACAGCTTGAGATTGTCTT#.(((((((((((.(((((((((#))))))))).))))))))))).	2143	2165	1	-19.6	1	0.00549119	0.485	0.00256856	0.0432817	-5.08246	20	22	11	3UTR
rno-miR-770-5p	NM_138907	Acot2	AGCACCACGTGTCTGGGCCACG#TGGCTCAGTGATAGTGGTGCTT#((((((((....((((((((..#)))))))).....)))))))).	2112	2134	1	-28.1	1	3.80482e-05	0.485	-0.155912	0.160311	-12.408	16	22	8	3UTR
rno-miR-1224	NM_138907	Acot2	GTGAGGACTGGGGAGGTGGAG#CTCTGCCTCCCAAGTGCTGGCA#((.((.(((.(((((((((((#))))))))))).))).)).)).	1788	1810	1	-30.6	0	0.000417671	0.471	0.177047	0.0744068	-8.63858	18	22	11	3UTR
rno-miR-653-3p	NM_138907	Acot2	TTCACTGGGGTTTGTTTCACTA#TGAATTCATTCTCCAGTGC#..((((((((..((.((((...#))))..))..)))))))).	2033	2052	1	-17.1	1	0.0365524	0.647	-0.139695	0.0681472	-11.864	14	19	8	3UTR
rno-miR-875	NM_138907	Acot2	TATACCTCAGTTTTATCAGGTG#GCCTGTGAGAGACTGAGGATATAG#((((((((((((((..(((((.#)))))...)))))))))).)))).	1971	1995	1	-22.9	1	0.0012412	0.632	0.125355	-0.0129255	-4.90607	19	24	10	3UTR
rno-miR-466d	NM_138907	Acot2	ATGTGTGTGTATGTCCTTTTGT#ACATGCACACACAA#.(((((((((((((........#))))))))))))).	2236	2250	1	-19.7	1	0.00565273	0.603	0.155737	0.131662	-4.76182	13	14	13	3UTR
rno-miR-3562	NM_138907	Acot2	TTGGGGCAGTGGCTGGATGGGA#CCGGCCTCTGCCTCC#..(((((((.((((((......#)))))).))))))).	1783	1798	1	-25.9	1	5.35556e-06	0.382	0.351614	0.0719957	-6.19951	13	15	7	3UTR
rno-miR-216b-5p	NM_138907	Acot2	AAATCTCTGCAGGCAAATGTGA#TTAAGTGCCTGTGAGAGAC#...((((((((((((.......#.))))))).))))).	1965	1984	1	-18	0	0.00072823	0.676	0.10584	-0.0230975	-6.74759	12	15	7	3UTR
rno-miR-3569	NM_138907	Acot2	GGAGGACAGCAGACTCAGGTC#ACTCTGACAAGTTGTCCTCCA#((((((((((....((((((.#)).))))...)))))))))).	2197	2218	1	-23	1	0.0032842	0.485	-0.0137464	0.0300384	-12.2551	16	21	10	3UTR
rno-miR-122b	NM_138907	Acot2	AACACCATTGTCACACTCCA#GTGATAGTGGTGC#..((((((((((((......#)))))))))))).	2119	2132	1	-19.5	1	1.55574e-05	0.471	-0.414475	0.109229	-5.9255	12	13	12	3UTR
rno-miR-3593-3p	NM_138907	Acot2	CTTCAACCTTAAGGGGGCCTCA#GAGGCTAGGCCTGAATTCTGAGGTTGGC#..((((((((((((.((((((.#))))))...)))......))))))))).	1756	1784	1	-22.5	1	0.000551203	0.426	-0.156893	0.0763802	-5.69245	18	28	9	3UTR
rno-miR-344g	NM_138907	Acot2	AGTCAGGCTCCTGGCAGGAGTC#GGCTCAGTGATAGTGGTGCTTTCTGCCCAGCCTGACA#.((((((((...(((((((((.#.)))).))))).)))))))).	2113	2150	1	-26.5	1	0.00048259	0.485	-0.376997	0.146797	-11.2074	17	21	8	3UTR
rno-miR-6326	NM_138907	Acot2	CTGGTCTGTAAAGGGACACAGCA#GTTTGTCTGTTTACCCCTGGCTGGCCTGGAACTTGCTTTGTAGACCAGA#(((((((((((((((.(.((((.#.))))))).........))))))))))))).	1709	1758	1	-22.4	1	0.00269968	0.426	-0.0431011	-0.0908402	-4.17062	20	31	13	3UTR
rno-miR-6333	NM_138907	Acot2	TAGGCTGGACTTGAACAGCCCGC#GTGGTGCTTTCTGCCCAGCCTGA#((((((((.(..(((.(((((((#)))).)))))).).)))))))).	2125	2148	1	-24.1	1	0.000262145	0.471	0.0684169	0.0276057	-11.3986	19	23	8	3UTR
rno-miR-301a-5p	XM_006240320	Acot2	GCTCTGACTTTATTGCACTAC#GTTGGGAAAAGAACCTCTTGGTGCGATGAGCTCTGTCATGGCG#(((.((((((((((((((((.#.))))))))))))....)))).))).	1571	1614	1	-21.5	0	1.15055e-05	0.544	0	0	-6.9696	19	26	12	3UTR
rno-miR-326-3p	XM_006240320	Acot2	CCTCTGGGCCCTTCCTCCAGT#CTGTGTGGATGCCCAGAGGC#(((((((((...(((.((((.#))).).))).))))))))).	1944	1964	1	-25.4	1	9.84676e-05	0.5	0	0	-11.5847	16	20	9	3UTR
rno-miR-17-1-3p	XM_006240320	Acot2	ACTGCAGTGAAGGCACTTGTGG#GCTGGGCTTTCTCTGCAGC#.((((((.((((((.((.((..#)).)))))))).)))))).	2076	2095	1	-21.5	1	4.28706e-05	0.574	0	0	-6.84241	16	19	8	3UTR
rno-miR-24-1-5p	XM_006240320	Acot2	GTGCCTACTGAGCTGATATCAG#GGCTCAGTGGTTAAGAGCACT#((((((((((((((........#))))))))))......)))).	2141	2162	1	-20.1	1	2.26996e-05	0.441	0	0	-4.90607	14	21	10	3UTR
rno-miR-24-2-5p	XM_006240320	Acot2	GTGCCTACTGAGCTGAAACAGT#GGCTCAGTGGTTAAGAGCACT#((((((((((((((........#))))))))))......)))).	2141	2162	1	-20.1	1	2.26996e-05	0.441	0	0	-4.90607	14	21	10	3UTR
rno-miR-29c-5p	XM_006240320	Acot2	TGACCGATTTCTCCTGGTGTTC#GAGCACAGGAGGAACGGA#...(((.((((((((.((((((#))))))))))))))))).	1805	1823	1	-22.8	0	0.000121547	0.5	0	0	-8.29128	17	18	17	3UTR
rno-miR-30c-2-3p	XM_006240320	Acot2	CTGGGAGAAGGCTGTTTACTCT#AGGCCACAGCATCTCCCAGT#((((((((..(((((...((..#))...))))).)))))))).	1769	1789	1	-22.1	1	0.0172705	0.456	0	0	-6.46952	15	20	8	3UTR
rno-miR-33-5p	XM_006240320	Acot2	GTGCATTGTAGTTGCATTGCA#TGAAGACAGCTACAGTGTACT#((((((((((((((..((.((#))))..)))))))))))))).	2244	2265	1	-20.3	1	0.00197809	0.706	0	0	-4.90607	18	21	14	3UTR
rno-miR-127-5p	XM_006240320	Acot2	CTGAAGCTCAGAGGGCTCTGATT#CAGAGGCTTGATGGTTTCAGT#((((((((...(((.(((((...#))))).)))...)))))))).	1957	1978	1	-21.6	1	0.000376428	0.485	0	0	-9.79669	16	21	8	3UTR
rno-miR-134-3p	XM_006240320	Acot2	CTGTGGGCCACCTAGTCACCAA#TGGTCCCGAGTTCAAATCCAGCAACCACATGGTGGCTCACAA#.(((((((((((..((......#.))..))))))))))).	2176	2218	1	-22	1	4.60069e-05	0.5	0	0	-5.9393	13	17	11	3UTR
rno-miR-138-1-3p	XM_006240320	Acot2	CGGCTACTTCACAACACCAGGG#TCTGGTGTGTCTGAAGACAGCTA#.((((.(((((..((((((((.#))))))))...)))))..)))).	2233	2256	1	-21.2	0	0.000288959	0.647	0	0	-10.3302	17	23	8	3UTR
rno-miR-143-3p	XM_006240320	Acot2	TGAGATGAAGCACTGTAGCTCA#TGAAGACAGCTACAGTGTACTCATA#....((((.(((((((((((..#.)))))))))))..)))).	2244	2269	1	-20.6	0	0.00281752	0.703	0	0	-10.603	15	19	11	3UTR
rno-miR-212-5p	XM_006240320	Acot2	ACCTTGGCTCTAGACTGCTTACTG#TGAGGGCTGGAGCCATGGC#.((.(((((((((.((.((((...#))))))))))))))).)).	2125	2144	1	-21.8	0	6.60097e-05	0.529	0	0	-7.68219	17	19	15	3UTR
rno-miR-449a-3p	XM_006240320	Acot2	CAGCTAACATGCAACTGCTCTC#GCAGCCTCAGTACCATGTTTAATAAAAACGTTGCATGAGGGCTGG#(((((..((((((((.......#.))))))))..))))).	2090	2135	1	-19.8	0	0.000537787	0.544	0	0	-7.61527	13	17	8	3UTR
rno-miR-451-3p	XM_006240320	Acot2	ATGGTAATGGTTCTCTTGCTGCT#GGCAGTAAAGAGAAAGCCATAGAACCC#..(((.(((((((((((((((((#)))))))).))))..)))))...))).	1873	1900	1	-22.5	0	0.0386036	0.662	0	0	-6.85796	20	27	8	3UTR
rno-miR-363-5p	XM_006240320	Acot2	CGGGTGGATCACGATGCAATTT#GTTGTGAGTCACCCA#.((((((.(((((((.......#))))))).)))))).	2003	2018	1	-18.9	1	2.01347e-05	0.471	0	0	-6.34001	13	15	7	3UTR
rno-miR-664-2-5p	XM_006240320	Acot2	CTGGCTGGGGAAAATGATTGG#CCACAGCATCTCCCAGTCAGC#(((((((((((...((..(((#)))))...)).))))))))).	1772	1793	1	-19	1	0.0029532	0.441	0	0	-9.43035	16	21	9	3UTR
rno-miR-881-3p	XM_006240320	Acot2	TAACTGTGGCATTTCTGAATAG#AGAAAGCCATAGA#...(((((((.(((((......#)))))))))))).	1883	1896	1	-15.1	0	0.0697297	0.647	0	0	-9.33931	12	13	12	3UTR
rno-miR-188-3p	XM_006240320	Acot2	CTCCCACATGCAGGGTTTGC#GCAAACTCTGGTTCTTTGTGGGAGC#((((((((..((((((((((#))))))))))......)))))))).	2034	2059	1	-27.3	1	5.94792e-05	0.515	0	0	-6.23647	18	25	10	3UTR
rno-miR-455-5p	XM_006240320	Acot2	TATGTGCCTTTGGACTACATCG#TAGTCCAGGAGGCAACAG#..(((((((((((((((.....#)))))))).))))).)).	1636	1654	1	-19.1	1	0.00460443	0.529	0	0	-4.957	15	18	8	3UTR
rno-miR-673-5p	XM_006240320	Acot2	CTCACAGCTCCGGTCCTTGGAG#GAGGGCTGGAGCCATGGC#.(((..((((((((((((....#))))))))))))..))).	2126	2144	1	-23.6	0	6.60097e-05	0.529	0	0	-9.81332	15	18	12	3UTR
rno-miR-742-3p	XM_006240320	Acot2	GAAAGCCACCATGTTGGGTAAA#ACCCAACATGGGTGCTG#...(((..(((((((((((...#)))))))))))..))).	2013	2030	1	-24.8	0	6.65664e-06	0.485	0	0	-10.3719	14	17	11	3UTR
rno-miR-742-3p	XM_006240320	Acot2	GAAAGCCACCATGTTGGGTAAA#ACCACATGGTGGCTC#...(((((((((((..(((...#)))))))))))))).	2199	2214	1	-22.4	0	2.11749e-05	0.485	0	0	-7.48304	14	15	14	3UTR
rno-miR-490-5p	XM_006240320	Acot2	CCATGGATCTCCAGGTGGGT#ACCCATTGCGAGATTCATGA#.((((((((((..(((((((#)))))))..)))))))))).	1830	1850	1	-24.3	1	0.0182704	0.5	0	0	-8.42926	17	20	10	3UTR
rno-miR-678	XM_006240320	Acot2	GTCTCGGGGCAAGGACTGGAGG#CCTTCAGACCTTTCTGTGAGACC#((((((.((.((((.(((((((#))))))).)))).)).)))))).	1701	1724	1	-26.7	0	0.000222622	0.485	0	0	-7.45922	19	23	7	3UTR
rno-miR-678	XM_006240320	Acot2	GTCTCGGGGCAAGGACTGGAGG#CTTCCAGTGGTCCCGAGT#..((((((((....((((((((#)))))))).)))))))).	2169	2187	1	-24.4	1	0.000530321	0.471	0	0	-13.2745	16	18	8	3UTR
rno-miR-711	XM_006240320	Acot2	GGGACCCTGGGAGAGATGTAAG#GCTCAGTGGTTAAGAGCACTGACTGCTCTTCCAGTGGTCCCG#(((((((((((((((..((.((#.)).))..))))))))).)))))).	2142	2184	1	-30	1	0.000122607	0.471	0	0	-4.17062	19	25	9	3UTR
rno-miR-3552	XM_006240320	Acot2	AGGCTGCAGGCCCACTTCCCT#GGGAAGCAAACTCTGGTTCTTTGTGGGAGCAGTATATACTCTTAAGGGCTGGGCTTTCTCTGCAGCCTC#((((((((((((((...((((#.)))).))))).....))))))))).	2029	2098	1	-29.7	1	1.57236e-05	0.588	0	0	-4.90607	18	26	9	3UTR
rno-miR-3568	XM_006240320	Acot2	TGTTCTTCCCGTGCAGAAGCAG#GCACAGGAGGAACGG#(((((((((.((((........#)))).))))))))).	1807	1822	1	-20.4	1	0.000128783	0.485	0	0	-6.14858	13	15	9	3UTR
rno-miR-3577	XM_006240320	Acot2	TCTGTCCCTCTTGGCCCTTAG#CCAGGAGGCAACAGAG#(((((.((((((((.......#))))))))..))))).	1640	1656	1	-18.3	0	0.00305206	0.544	0	0	-6.80703	13	16	8	3UTR
rno-miR-133c	XM_006240320	Acot2	CAGCTGGTTGAAGGGGACCAA#TGGTCCCGAGTTCAAATCCAGCA#..((((((((((.(((((((.#)))))))...)))))..))))).	2176	2199	1	-25.2	1	0.0846122	0.485	0	0	-6.24613	17	23	7	3UTR
rno-miR-3586-3p	XM_006240320	Acot2	ATACTAGACTGTGAGCTCCTCGA#GGTGGCTCACAACCATCTGTAATGGGATCTGGTGTG#(((((((((((((((((((....#)).))))))))..............).)))))))).	2206	2242	1	-19.5	1	1.72193e-05	0.544	0	0	-3.93757	19	36	8	3UTR
rno-miR-1843a-5p	XM_006240320	Acot2	TATGGAGGTCTCTGTCTGACT#TCATGACTGAGCCTCCATAA#((((((((.(((.((((((..#))).))).))))))))))).	1844	1864	1	-22.9	1	0.000708979	0.544	0	0	-6.28309	17	20	11	3UTR
rno-miR-6216	XM_006240320	Acot2	GATACACAGAGGCAGGAGGAGAA#TCCATGTGTGTCTGTGTGG#..((((((((.(((.(.(((...#))).).))).)))))))).	1933	1952	1	-21.5	1	3.5754e-05	0.588	0	0	-8.51722	15	19	8	3UTR
rno-miR-6319	XM_006240320	Acot2	TCATTCTCGCTGCTCTGGAGT#GCAACAGAGCAGCTGTGGAAGGGAA#((.((((.(((((((((..((#))..)))))))))...))))..)).	1647	1672	1	-21.1	0	1.58882e-05	0.515	0	0	-7.80875	17	25	9	3UTR
rno-miR-6326	XM_006240320	Acot2	CTGGTCTGTAAAGGGACACAGCA#TGTTGTGTCAACCTTCAGACCT#..((((((..(((((((((((((#)))))))))..)))))))))).	1690	1712	1	-25.1	1	0.00292258	0.529	0	0	-7.2559	19	22	10	3UTR
rno-miR-149-5p	XM_006240320	Acot2	TCTGGCTCCGTGTCTTCACTCCC#TGAGGGCTGGAGCCAT#..((((((((.(((((((.....#))))))))))))))).	2125	2141	1	-23.7	1	0.000645885	0.515	0	0	-7.78178	15	16	15	3UTR
rno-miR-1843b-5p	XM_006240320	Acot2	ATGGAGGTCTCTGTCTGACTTAG#GAGATTCATGACTGAGCCTCCATA#(((((((.(((.(((((((((..#)))..))).))).)))))))))).	1839	1863	1	-21.8	1	0.0007058	0.529	0	0	-9.59801	19	24	10	3UTR
rno-miR-452-5p	XM_006240320	Acot2	AACTGTTTGCAGAGGAAACTGAG#CAGTATATACTCTTAAGGGCTGGGCTTTCTCTGCAGCCTCAGTA#.((((.(((((((((((.((.((#.)).)).)))))))))))...)))).	2058	2102	1	-22.2	0	8.48748e-06	0.559	0	0	-5.69428	19	26	11	3UTR
rno-miR-6216	NM_173094	Hmgcs2	GATACACAGAGGCAGGAGGAGAA#CCTCCCTCTGTGGATCC#((..(((((((...(((((....#))))))))))))..)).	1701	1718	0.984615	-21.2	0	0.000468589	0.368	-0.0676615	-0.00513122	-14.0199	14	17	12	3UTR
rno-miR-140-5p	NM_173094	Hmgcs2	CAGTGGTTTTACCCTATGGTAG#ACCAGAGCCCCCCTGTGGAGAGGGAGAAAGAAAGGGGAGCCGCTGA#(((((((((..((((.......#.))))))))))))).	1764	1810	1	-18.7	1	0.00067916	0.368	0.0441867	-0.116468	-8.2379	13	15	13	3UTR
rno-miR-19b-1-5p	NM_173094	Hmgcs2	AGTTTTGCAGGTTTGCATCCAG#GGAGCCGCTGACCTGCAGGGA#..(((((((((((.((.(((..#)))...)).))))))))))).	1799	1820	1	-21	1	0.000266136	0.368	-0.0732077	-0.0871078	-5.81384	16	21	11	3UTR
rno-miR-124-5p	NM_173094	Hmgcs2	CGTGTTCACAGCGGACCTTGAT#AGGTTCTGCTGTGGACCA#.(.(((((((((((((((....#)))).)))))))))))).	1750	1768	1	-23.1	0	2.26187e-05	0.412	0.0333829	-0.086539	-5.35086	16	18	12	3UTR
rno-miR-210-3p	NM_173094	Hmgcs2	CTGTGCGTGTGACAGCGGCTGA#CAGCCGCCCGTTTGTTGCAGCT#....((.((((((((((((((.#))))))).....))))))))).	1843	1865	1	-22	0	0.00206202	0.456	-0.234631	-0.130195	-11.0902	16	22	9	3UTR
rno-miR-298-5p	NM_173094	Hmgcs2	GGCAGAGGAGGGCTGTTCTTCCC#GGATCTGCTCTGCGGTGAAGGGCCTCCCTCTGTG#.(((((((.(((((.(((..((.#.)).))).))))).))))))).	1679	1713	1	-27.3	1	2.39409e-05	0.382	0.315434	-0.00682266	-5.58516	17	22	7	3UTR
rno-miR-370-3p	NM_173094	Hmgcs2	GCCTGCTGGGGTGGAACCTGGT#CCAAACGGCTTCCACTTAAAATTCCACCCACAGCAGT#..((((((((((((((......#.)))))))).)))))).	1613	1650	1	-25.8	1	0.0167956	0.5	-0.432512	-0.0425746	-4.957	14	17	8	3UTR
rno-miR-133b-5p	NM_173094	Hmgcs2	GCTGGTCAAACGGAACCAAGT#GGTTCTGCTGTGGACCAGA#.((((((...(((((((....#))))))).....)))))).	1751	1770	1	-20.6	1	0.000193332	0.412	0.206874	-0.0843121	-8.40586	13	19	7	3UTR
rno-miR-485-3p	NM_173094	Hmgcs2	CATACACGGCTCTCCTCTCTTC#AAGAAAGGGGAGCCGCTGA#....((((((((((((.((((.#)))).)))))))))).)).	1791	1810	1	-23.2	0	0.00067916	0.368	-0.23426	-0.031438	-9.54656	16	19	10	3UTR
rno-miR-708-5p	NM_173094	Hmgcs2	AAGGAGCTTACAATCTAGCTGGG#CCCGGGGAAAGAATGTGAGCA#.....(((((((.(((..(((((#)))))....))).))))))).	1582	1603	1	-19.3	0	0.00347531	0.5	-0.368053	0.09732	-14.9547	15	21	7	3UTR
rno-miR-760-3p	NM_173094	Hmgcs2	CGGCTCTGGGTCTGTGGGGA#TCCCCGGGGAAAGAATGTGAGCAGAGCCGT#((((((((..(((.((((((#)))))).)))...........)))))))).	1580	1610	1	-28	1	0.00554716	0.515	0.133449	0.012454	-7.09331	17	30	8	3UTR
rno-miR-764-5p	NM_173094	Hmgcs2	GGTGCTCACATGTCCTCCTCCA#GGGGAAAGAATGTGAGCAGAGCCG#(((((((((((....(((((..#)))))....))))))))...))).	1585	1609	1	-22.5	1	0.0063132	0.515	-0.0207525	0.0603857	-10.1658	16	24	8	3UTR
rno-miR-344b-5p	NM_173094	Hmgcs2	AGTCAGGCTGCTGGTTATATTC#GGATACAGACCTTCCCCACAGCCTGGCA#.(((((((((.(((........#.)))))))))))).	1817	1845	1	-21.3	1	0.00012899	0.426	-0.243906	-0.107317	-7.5866	12	14	12	3UTR
rno-miR-344b-5p	NM_173094	Hmgcs2	AGTCAGGCTGCTGGTTATATTC#GAATGTGAGCAGAGCCG#.....((((.(((.((((((((#)))))))).))))))).	1592	1609	1	-19.4	0	0.0063132	0.515	-0.508362	0.121052	-15.7649	15	17	8	3UTR
rno-miR-3579	NM_173094	Hmgcs2	GCGCATGTTCTATGGTCAACCA#TGGGCTATCATAGTTCATGCTCG#(.(((((..(((((((...(((#)))...)))))))..))))).).	1878	1901	1	-19.5	0	0.0194989	0.632	0.0107771	0.0497782	-8.47127	16	23	7	3UTR
rno-miR-3594-5p	NM_173094	Hmgcs2	CCCAGGGCAGAGCAGTGTGAA#CTGCTCTGCGGTGAAGGGCCTCCCTCTGTGGATCCTGGGT#(((((((((((((((......#)))))))))........................)))))).	1683	1723	1	-25.1	1	2.25804e-05	0.368	0.0353971	0.0427616	-4.17062	15	40	9	3UTR
rno-miR-149-5p	NM_173094	Hmgcs2	TCTGGCTCCGTGTCTTCACTCCC#GGGAGAAAGAAAGGGGAGCCGC#..(((((((.(.((((..(((((#))))).))))..).))))))).	1785	1807	1	-24.3	1	0.000941704	0.368	-0.133027	-0.0653736	-9.54631	17	22	7	3UTR
rno-miR-3064-5p	NM_173094	Hmgcs2	TGGCTGTTGTGGTGTGCAAA#CACCCACAGCAGTGAA#(.((((((((((.(((....#))))))))))))).).	1637	1653	1	-20.6	1	0.00265952	0.5	0.473804	-0.0411044	-6.39038	14	16	13	3UTR
