# Supplementary material for: Role of mitochondrial metabolic disorder and immune infiltration in diabetic cardiomyopathy: new insights from bioinformatics analysis
Source: J Transl Med. 2023 Feb 1;21:66. doi: 10.1186/s12967-023-03928-8 (PMC9893675; doi:10.1186/s12967-023-03928-8)
Supplement: Supplementary file 10 — Additional file 10: Table S9. Infiltration of immune cell types compared between the DCM and CON. [file 12967_2023_3928_MOESM10_ESM.xlsx]

## Sheet: ImmuCellAI_group_result（需修改）
Additional file 10: Table S9. Infiltration of immune cell types compared between the DCM and CON.
	DCM	CON	p value
B_cell	0.15455	0.0861	0.01
Dendritic_cells	0.08225	0.16235	0
Granulocytes	0.2625	0.28535	0.02
Macrophage	0.11895	0.1214	0.48
Monocytes	0.1465	0.12	0.08
NK	0.14605	0.18255	0.22
T_cell	0.04595	0.0604	0.63
CD4_T_cell	0.00895	0.01455	0.74
CD8_T_cell	0.0057	0.0135	0.32
NKT	0.00515	0.00355	0.45
Tgd	0.0099	0.01495	0.35
B1_cell	0	0	0.37
Follicular_B	0	0	NA
Germinal_center_B	0.0044	0.00295	0.57
Marginal_Zone_B	0.09785	0.05065	0
Memory_B	0.03255	0.01715	0.03
Plasma_cell	0.02045	0.0211	0.8
cDC1	0.02645	0.0511	0.01
cDC2	0.0032	0.0141	0
MoDC	0.03205	0.0523	0
pDC	0.0238	0.04075	0
Basophil	0.08655	0.08915	0.97
Eosinophil	0.0573	0.0767	0.28
mast_cell	0.0746	0.08905	0.8
Neutrophils	0.0252	0.03145	0.48
M1_macrophage	0.0444	0.05285	0.85
M2_macrophage	0.0836	0.05	0.08
CD4_Tm	0.00175	0.00375	0.33
Naive_CD4_T	0.00325	0.00415	0.62
T_helper_cell	0.00245	0.0038	0.82
Treg	0.00125	0.0012	0.79
CD8_Tc	0.0005	0.00095	0.47
CD8_Tcm	0.00165	0.00495	0.27
CD8_Tem	0.00025	0.0025	0.06
CD8_Tex	0.00115	0.00265	0.47
Naive_CD8_T	0.00095	0.0025	0.21
Infiltration_score	1.449	0.895	0.01
