# Supplementary material for: Role of mitochondrial metabolic disorder and immune infiltration in diabetic cardiomyopathy: new insights from bioinformatics analysis
Source: J Transl Med. 2023 Feb 1;21:66. doi: 10.1186/s12967-023-03928-8 (PMC9893675; doi:10.1186/s12967-023-03928-8)
Supplement: Supplementary file 11 — Additional file 11: Table S10. Relationship between hub MitoDEGs and immune cells. [file 12967_2023_3928_MOESM11_ESM.xlsx]

## Sheet: Sheet1
Additional file 11: Table S10. Relationship between hub MitoDEGs and immune cells.
correlation		B_cell	Dendritic_cells	Granulocytes	Macrophage	Monocytes	NK	T_cell	CD4_T_cell	CD8_T_cell	NKT	Tgd	B1_cell	Germinal_center_B	Marginal_Zone_B	Memory_B	Plasma_cell	cDC1	cDC2	MoDC	pDC	Basophil	Eosinophil	mast_cell	Neutrophils	M1_macrophage	M2_macrophage	CD4_Tm	Naive_CD4_T	T_helper_cell	Treg	CD8_Tc	CD8_Tcm	CD8_Tem	CD8_Tex	Naive_CD8_T
	Pdk4	0.449624	-0.789474	-0.536842	0.222556	0.544361	-0.347368	0.0285714	-0.133835	0.10383	0.176605	-0.189474	0.298393	-0.107579	0.619549	0.406015	0.0661654	-0.771429	-0.601204	-0.730827	-0.639098	-0.130827	-0.0300752	-0.267669	-0.0105263	-0.0330827	0.383459	-0.203913	-0.164033	-0.11132	-0.217539	0.139819	0.083817	-0.102983	0.160014	-0.0426705
	Oxct1	-0.46015	0.341353	0.342857	0.0225564	-0.106767	0.166917	0.00300752	-0.183459	0.457006	-0.109435	0.075188	-0.298393	-0.416679	-0.511278	-0.4	-0.114286	0.285714	0.379985	0.371429	0.592481	-0.150376	0.500752	-0.0676692	0.157895	0.087218	-0.135338	0.0406321	-0.173815	-0.206093	-0.340234	0.418694	0.500616	0.708583	0.416799	0.424419
	Ivd	-0.416541	0.240602	0.336842	-0.0526316	-0.133835	0.206015	0.0917293	-0.136842	0.464585	-0.0852836	0.165414	-0.13925	-0.389405	-0.46015	-0.377444	0.0466165	0.16391	0.353649	0.284211	0.445113	-0.0962406	0.488722	-0.2	0.237594	0.0406015	-0.198496	0.0790068	-0.108352	-0.165476	-0.24539	0.527952	0.550906	0.699361	0.457945	0.448802
	Hsd17b4	0.487218	-0.8	-0.505263	0.46015	0.479699	-0.484211	0.0947368	-0.106767	0.137178	0.192454	-0.0360902	0.258607	-0.0924269	0.669173	0.421053	0.0736842	-0.810526	-0.610986	-0.754887	-0.616541	-0.165414	-0.0661654	-0.174436	-0.0526316	0.17594	0.604511	-0.136945	-0.139202	-0.0872509	-0.224313	0.214695	0.181349	-0.0245929	0.219448	-0.0502902
	Hmgcs2	0.553383	-0.843609	-0.690226	0.445113	0.505263	-0.442105	-0.00902256	0.0526316	-0.135662	0.263398	-0.17594	0.377964	0.178793	0.718797	0.449624	0.105263	-0.827068	-0.65839	-0.842105	-0.833083	-0.129323	-0.428571	0.0195489	-0.0661654	0.177444	0.571429	-0.103085	0.0293454	0.0789771	0.0489274	-0.0893927	-0.1082	-0.423459	-0.0655296	-0.225544
	Gpam	0.203008	-0.610526	-0.642105	0.215038	0.308271	0.0616541	0.087218	-0.0421053	0.259197	0.234719	-0.201504	0.258607	-0.178793	0.240602	0.171429	0.184962	-0.618045	-0.394282	-0.565414	-0.386466	-0.306767	0.148872	-0.165414	-0.0390977	-0.0796992	0.359398	0.00677201	-0.0850264	-0.00752163	-0.243132	0.225392	0.302503	0.106057	0.304027	0.11201
	Decr1	0.466165	-0.837594	-0.571429	0.439098	0.506767	-0.457143	0.0165414	-0.0887218	0.100799	0.134341	-0.16391	0.377964	-0.0333343	0.661654	0.380451	0.0962406	-0.840602	-0.595937	-0.789474	-0.693233	-0.171429	-0.184962	-0.133835	-0.0300752	0.181955	0.56391	-0.185102	-0.102333	-0.0714554	-0.146029	0.156628	0.125725	-0.149863	0.165348	-0.0586719
	Cpt1a	0.368421	-0.744361	-0.512782	0.38797	0.434586	-0.308271	-0.0902256	-0.24812	0.145514	0.0588683	-0.0481203	-0.0198929	-0.293948	0.559398	0.315789	0.00451128	-0.730827	-0.527464	-0.666165	-0.572932	-0.153383	0.0255639	-0.169925	-0.0511278	0.133835	0.451128	-0.310008	-0.273138	-0.188793	-0.362063	0.216987	0.160776	-0.0745473	0.203447	-0.0160014
	Acsl6	-0.403911	0.375329	0.34073	0.0812336	-0.151937	0.172997	-0.0609252	-0.274539	0.404864	-0.0943758	0.0594208	-0.258705	-0.215239	-0.543814	-0.261753	-0.00376081	0.283565	0.341362	0.398646	0.603234	-0.032343	0.594208	0.0759684	-0.142159	0.155698	-0.0534035	-0.0233346	-0.290553	-0.2769	-0.409639	0.366113	0.455831	0.668102	0.385703	0.408571
	Acot2	0.357895	-0.57594	-0.32782	0.384962	0.494737	-0.381955	-0.227068	-0.454135	0.131872	-0.0618872	-0.138346	0.0596786	0.062123	0.378947	0.443609	0.121805	-0.640602	-0.388262	-0.559398	-0.37594	-0.0481203	0.0511278	0.177444	-0.377444	0.190977	0.493233	-0.368698	-0.498119	-0.464836	-0.547987	0.174201	0.144775	0.0353523	0.188969	0.0441944
	Acadsb	-0.136842	0.0300752	0.0616541	-0.121805	-0.210526	0.306767	0.0631579	-0.166917	0.338018	0.0113208	-0.087218	0.13925	-0.277281	-0.126316	-0.138346	0.203008	0.043609	0.136193	0.043609	0.22406	-0.333835	0.374436	-0.278195	0.269173	-0.196992	-0.0947368	-0.0406321	-0.171558	-0.183528	-0.308619	0.366739	0.385558	0.479562	0.336792	0.156966
P value		B_cell	Dendritic_cells	Granulocytes	Macrophage	Monocytes	NK	T_cell	CD4_T_cell	CD8_T_cell	NKT	Tgd	B1_cell	Germinal_center_B	Marginal_Zone_B	Memory_B	Plasma_cell	cDC1	cDC2	MoDC	pDC	Basophil	Eosinophil	mast_cell	Neutrophils	M1_macrophage	M2_macrophage	CD4_Tm	Naive_CD4_T	T_helper_cell	Treg	CD8_Tc	CD8_Tcm	CD8_Tem	CD8_Tex	Naive_CD8_T
	Pdk4	0.0467019	3.4905e-05	0.0146633	0.345621	0.0130826	0.133449	0.904822	0.573756	0.663108	0.456374	0.423665	0.201291	0.65167	0.00357585	0.0756894	0.781664	6.81247e-05	0.0050508	0.000252151	0.00241658	0.582473	0.899837	0.253892	0.964869	0.889876	0.0951244	0.388511	0.489536	0.640328	0.356882	0.55658	0.725345	0.665705	0.500381	0.858235
	Oxct1	0.0412007	0.140765	0.13891	0.924798	0.654142	0.481825	0.98996	0.438795	0.0427887	0.646034	0.752727	0.201291	0.0676083	0.0212206	0.0805539	0.631392	0.222035	0.0984142	0.106871	0.00591047	0.526855	0.0245193	0.776821	0.506147	0.714638	0.569419	0.864946	0.463632	0.38335	0.142157	0.0661568	0.0245644	0.000470659	0.067521	0.0621618
	Ivd	0.067708	0.306861	0.146433	0.825581	0.573756	0.383533	0.700516	0.565096	0.0390394	0.720722	0.485838	0.558204	0.0896805	0.0412007	0.100873	0.84527	0.489867	0.126101	0.224585	0.0492253	0.686487	0.028772	0.397873	0.313131	0.865047	0.401504	0.740572	0.64932	0.485671	0.297038	0.0167268	0.0118213	0.000599891	0.0423093	0.0471543
	Hsd17b4	0.029342	2.29289e-05	0.0230592	0.0412007	0.0323261	0.0305085	0.691153	0.654142	0.564134	0.416273	0.879931	0.270931	0.69834	0.00125275	0.0644881	0.757529	1.46876e-05	0.00421215	0.000119603	0.00378956	0.485838	0.781664	0.462011	0.825581	0.458099	0.0047531	0.5648	0.55834	0.714535	0.341727	0.363357	0.444166	0.91803	0.352572	0.833234
	Hmgcs2	0.0113704	2.96913e-06	0.000756395	0.0492253	0.0230592	0.0509647	0.969885	0.825581	0.568488	0.261836	0.458099	0.100366	0.450723	0.000355919	0.0467019	0.658728	6.88422e-06	0.0015984	3.21749e-06	5.12385e-06	0.586853	0.0593798	0.934803	0.781664	0.454203	0.00848909	0.665391	0.902256	0.740666	0.837695	0.707819	0.649782	0.0628183	0.783714	0.339015
	Gpam	0.390666	0.00424878	0.00226988	0.362574	0.186056	0.796239	0.714638	0.860095	0.269801	0.319196	0.394261	0.270931	0.450723	0.306861	0.469886	0.434986	0.00368142	0.08539	0.00937432	0.0923416	0.188323	0.531043	0.485838	0.870004	0.738374	0.119633	0.977395	0.721532	0.974893	0.301646	0.339349	0.194854	0.656305	0.192503	0.638245
	Decr1	0.0382905	4.07449e-06	0.00848909	0.0527507	0.0225882	0.0427185	0.944817	0.709921	0.672412	0.572295	0.489867	0.100366	0.889043	0.00148622	0.097968	0.686487	3.48378e-06	0.00555654	3.4905e-05	0.000701451	0.469886	0.434986	0.573756	0.899837	0.442621	0.00960697	0.434634	0.667699	0.764662	0.539003	0.509607	0.597387	0.528282	0.486013	0.805911
	Cpt1a	0.109964	0.000167396	0.0207797	0.0909729	0.0555188	0.186056	0.705213	0.291523	0.540452	0.805273	0.840339	0.933658	0.208411	0.0103333	0.174994	0.98494	0.000252151	0.0168463	0.00134213	0.00827879	0.518524	0.914804	0.473849	0.830495	0.573756	0.0458833	0.183459	0.243946	0.425364	0.116717	0.358132	0.498316	0.754772	0.38962	0.946616
	Acsl6	0.0773652	0.102953	0.141539	0.733511	0.522524	0.46577	0.798601	0.241438	0.076603	0.692274	0.803479	0.270745	0.362115	0.0131928	0.264938	0.987445	0.225684	0.140753	0.08168	0.00486628	0.892324	0.00573133	0.750238	0.549929	0.512157	0.823062	0.922211	0.213959	0.237251	0.0728665	0.112382	0.0433939	0.00128397	0.093042	0.07369
	Acot2	0.121301	0.00787094	0.158244	0.0937255	0.0265786	0.0965386	0.335674	0.0442791	0.579437	0.795485	0.560787	0.802643	0.794721	0.0994129	0.0500892	0.608957	0.00234227	0.0907088	0.0103333	0.102349	0.840339	0.830495	0.454203	0.100873	0.419927	0.0271142	0.109676	0.0254046	0.0389193	0.0123711	0.462624	0.542534	0.88237	0.424923	0.853224
	Acadsb	0.565096	0.899837	0.796239	0.608957	0.37297	0.188323	0.791373	0.481825	0.144941	0.962219	0.714638	0.558204	0.236581	0.595654	0.560787	0.390666	0.855148	0.566961	0.855148	0.342286	0.150299	0.103841	0.234974	0.251131	0.405152	0.691153	0.864946	0.469547	0.43862	0.185533	0.111722	0.0931755	0.0323828	0.146497	0.508682
